# Supplementary material for: Integrative functional genomics reveals transcriptional regulatory function of risk alleles for metabolic liver disease
Source: Research Square preprint supplement (doi:10.21203/rs.3.rs-6984670/v1), 2025-10-23
Supplement: Supplementary file 1 [file 05c95998495329ab00c3344b.xlsx]

## Sheet: Source_of_SNPs
Table S1. Origin of selected noncoding variants for MPRA.
Reference	GWAS catalog ID	Type of GWAS trait	Number of selected SNPs
Fairfield CJ, et al., Hepatol Commun, 2022 [1]	GCST90054782	MASLD	598 (p < 1e -06)
Ghodsian N, et al., Cell Rep Med, 2021 [2]	GCST90091033	MASLD	320 (p < 1e -06)
Anstee QM, et al., J Hepatol, 2020 [3]	GCST90011885/ pub ID 32298765	MASLD	441 (p < 1e -06)
Namjou B, et al., BMC Med, 2019 [4]	31311600/GCST008468	MASLD	99 (p < 1e -06)
Gao C, et al., Genet Epidemiol, 2021 [5]	GCST90025866	ALT	300 (p < 5e-08)
Miao Z, et al., HGG Adv, 2021 [6]	GCST90094907,GCST90094908, GCST90094909	MASLD	5187 (p < 5e-08)
Vujkovic M, et al., Nat Genet, 2022 [7]		MASLD	77 (p< 5e -08)
Emdin CA, et al., Gastroenterology, 2021 [8]		Cirrhosis	rs12904, rs888655, rs9398804, rs1799992,rs28929474, rs1027087
Emdin CA, et al., PLoS Genet, 2020 [9]		Cirrhosis	rs641738, rs72613567, rs1800562
References
[1] Fairfield CJ, Drake TM, Pius R, Bretherick AD, Campbell A, Clark DW, Fallowfield JA, Hayward C, Henderson NC, Joshi PK, Mills NL, Porteous DJ, Ramachandran P, Semple RK, Shaw CA, Sudlow CLM, Timmers PRHJ, Wilson JF, Wigmore SJ, Harrison EM, Spiliopoulou A. Genome-Wide Association Study of NAFLD Using Electronic Health Records. Hepatol Commun. 2022 Feb;6(2):297-308. doi: 10.1002/hep4.1805. Epu…
[2] Ghodsian N, Abner E, Emdin CA, Gobeil É, Taba N, Haas ME, Perrot N, Manikpurage HD, Gagnon É, Bourgault J, St-Amand A, Couture C, Mitchell PL, Bossé Y, Mathieu P, Vohl MC, Tchernof A, Thériault S, Khera AV, Esko T, Arsenault BJ. Electronic health record-based genome-wide meta-analysis provides insights on the genetic architecture of non-alcoholic fatty liver disease. Cell Rep Med. 2021 Nov 3;…
[3] Anstee QM, Darlay R, Cockell S, Meroni M, Govaere O, Tiniakos D, Burt AD, Bedossa P, Palmer J, Liu YL, Aithal GP, Allison M, Yki-Järvinen H, Vacca M, Dufour JF, Invernizzi P, Prati D, Ekstedt M, Kechagias S, Francque S, Petta S, Bugianesi E, Clement K, Ratziu V, Schattenberg JM, Valenti L, Day CP, Cordell HJ, Daly AK; EPoS Consortium Investigators. Genome-wide association study of non-alcohol…
[4] Namjou B, Lingren T, Huang Y, Parameswaran S, Cobb BL, Stanaway IB, Connolly JJ, Mentch FD, Benoit B, Niu X, Wei WQ, Carroll RJ, Pacheco JA, Harley ITW, Divanovic S, Carrell DS, Larson EB, Carey DJ, Verma S, Ritchie MD, Gharavi AG, Murphy S, Williams MS, Crosslin DR, Jarvik GP, Kullo IJ, Hakonarson H, Li R; eMERGE Network; Xanthakos SA, Harley JB. GWAS and enrichment analyses of non-alcoholic…
[5] Gao C, Marcketta A, Backman JD, O'Dushlaine C, Staples J, Ferreira MAR, Lotta LA, Overton JD, Reid JG, Mirshahi T, Regeneron Genetics Center, Geisinger Regeneron Discovehr Collaboration, Baras A, Abecasis G, Shuldiner AR, Van Hout CV, McCarthy S. Genome-wide association analysis of serum alanine and aspartate aminotransferase, and the modifying effects of BMI in 388k European individuals. Gen…
[6] Miao Z, Garske KM, Pan DZ, Koka A, Kaminska D, Männistö V, Sinsheimer JS, Pihlajamäki J, Pajukanta P. Identification of 90 NAFLD GWAS loci and establishment of NAFLD PRS and causal role of NAFLD in coronary artery disease. HGG Adv. 2021 Aug 24;3(1):100056. doi: 10.1016/j.xhgg.2021.100056. PMID: 35047847; PMCID: PMC8756520.
[7] Vujkovic M, Ramdas S, Lorenz KM, Guo X, Darlay R, Cordell HJ, He J, Gindin Y, Chung C, Myers RP, Schneider CV, Park J, Lee KM, Serper M, Carr RM, Kaplan DE, Haas ME, MacLean MT, Witschey WR, Zhu X, Tcheandjieu C, Kember RL, Kranzler HR, Verma A, Giri A, Klarin DM, Sun YV, Huang J, Huffman JE, Creasy KT, Hand NJ, Liu CT, Long MT, Yao J, Budoff M, Tan J, Li X, Lin HJ, Chen YI, Taylor KD, Chang …
[8] Emdin CA, Haas M, Ajmera V, Simon TG, Homburger J, Neben C, Jiang L, Wei WQ, Feng Q, Zhou A, Denny J, Corey K, Loomba R, Kathiresan S, Khera AV. Association of Genetic Variation With Cirrhosis: A Multi-Trait Genome-Wide Association and Gene-Environment Interaction Study. Gastroenterology. 2021 Apr;160(5):1620-1633.e13. doi: 10.1053/j.gastro.2020.12.011. Epub 2020 Dec 11. PMID: 33310085; PMCID…
[9] Emdin CA, Haas ME, Khera AV, Aragam K, Chaffin M, Klarin D, Hindy G, Jiang L, Wei WQ, Feng Q, Karjalainen J, Havulinna A, Kiiskinen T, Bick A, Ardissino D, Wilson JG, Schunkert H, McPherson R, Watkins H, Elosua R, Bown MJ, Samani NJ, Baber U, Erdmann J, Gupta N, Danesh J, Saleheen D, Chang KM, Vujkovic M, Voight B, Damrauer S, Lynch J, Kaplan D, Serper M, Tsao P; Million Veteran Program; Merc…
