# Supplementary material for: Integrative functional genomics reveals transcriptional regulatory function of risk alleles for metabolic liver disease
Source: Research Square preprint supplement (doi:10.21203/rs.3.rs-6984670/v1), 2025-10-23
Supplement: Supplementary file 2 [file 0e6f1ca9a88f1a8c74d6d346.xlsx]

## Sheet: Sheet1
Table S7. Effect size weight of 114 LD-independent DAVs for PRS construction
rsid	chr	pos	atac_region	NEA	EA	GWAS_beta	GWAS_p	MPRA_beta	MPRA_p	MPRA_FDR
rs76875252	1	2235370	chr1:2235307-2235433	C	T	-0.00445035	0.0094	0.93028	0.00133091	0.00934361
rs17037388	1	11797979	chr1:11797916-11798042	A	G	0.0033722	0.006	0.367232	0.00109145	0.00842713
rs6603891	1	16195503	chr1:16195440-16195566	G	A	-0.0078757	4.4e-14	1.43357	0.00046568	0.0059558
rs116399264	1	23172908	chr1:23172845-23172971	C	T	-0.0018451	0.12	-1.52264	6.50111e-05	0.00292033
rs502273	1	28263808	chr1:28263745-28263871	T	C	-0.000265106	0.78	-1.24171	2.03919e-05	0.00213102
rs28699363	1	50649136	chr1:50649073-50649199	C	T	0.00293909	0.0014	-1.03993	0.00104088	0.00837531
rs10889356	1	62689678	chr1:62689615-62689741	G	A	0.00538476	1.7e-08	-1.753	4.97316e-06	0.00134275
rs7530690	1	88654015	chr1:88653952-88654078	G	A	0.00534318	1.2e-08	-1.8104	8.88165e-06	0.00179853
rs11164897	1	93304815	chr1:93304752-93304878	C	G	-0.000716574	0.56	-0.574293	0.000909419	0.00783649
rs10796939	1	155116319	chr1:155116256-155116382	C	T	0.00340219	0.00029	-0.866245	0.000572905	0.00643202
rs1647284	2	27385248	chr2:27385185-27385311	C	T	0.00404075	1.4e-05	-1.34376	1.31427e-05	0.0018918
rs75331444	2	43842633	chr2:43842570-43842696	G	A	-7.35407e-05	0.97	-1.05332	1.33826e-05	0.0018918
rs6543007	2	101047122	chr2:101047059-101047185	T	C	0.00276185	0.0031	-0.282728	0.000474166	0.00596871
rs3752659	2	102385138	chr2:102385075-102385201	A	G	-0.00285938	0.026	-4.4795	0.00081116	0.0076105
rs4468823	2	111926794	chr2:111926731-111926857	T	C	0.00156789	0.094	0.640503	0.000373968	0.00564436
rs6722922	2	113083938	chr2:113083875-113084001	C	T	0.00251723	0.0069	-0.875715	0.00105255	0.00837698
rs6739861	2	113818741	chr2:113818678-113818804	C	T	0.00577559	0.00069	-0.227217	0.000256242	0.00489585
rs355871	2	164775558	chr2:164775495-164775621	A	G	0.00602401	2.7e-07	-0.486908	0.00118249	0.00881426
rs10803839	2	169761698	chr2:169761635-169761761	G	A	0.00201594	0.04	0.500945	0.000355695	0.00550535
rs11895224	2	226058142	chr2:226058079-226058205	T	C	0.0061756	1.5e-08	-0.386727	0.00100911	0.00822866
rs201212687	2	232651824	chr2:232651761-232651887	A	C	NA	NA	-0.771222	0.00143528	0.00976958
rs113843561	3	12363497	chr3:12363434-12363560	G	T	NA	NA	-1.18678	0.00109586	0.00842713
rs57440162	3	29318461	chr3:29318398-29318524	T	C	-0.00224198	0.019	-0.535404	0.00019296	0.00422497
rs3821826	3	37032877	chr3:37032814-37032940	C	G	0.003249	0.00037	-0.452555	0.000590816	0.00643804
rs9864630	3	113284226	chr3:113284163-113284289	G	A	-0.00187414	0.58	-0.880025	0.000159681	0.00400331
rs143319532	3	142167926	chr3:142167863-142167989	C	T	-0.00181163	0.2	-0.47319	0.000185991	0.00418481
rs12330903	3	142946133	chr3:142946070-142946196	T	C	0.0023284	0.011	-1.907	3.6714e-05	0.0023525
rs12633863	3	149493725	chr3:149493662-149493788	G	A	-0.000797944	0.39	0.568413	0.00131356	0.00934361
rs4679903	3	160610780	chr3:160610717-160610843	C	A	-0.00203145	0.043	0.65238	0.000275976	0.00505154
rs7656630	4	87252540	chr4:87252477-87252603	T	C	0.00342757	0.00021	1.29253	4.03999e-05	0.0023525
rs7665143	4	99527065	chr4:99527002-99527128	C	G	0.00239299	0.022	0.811433	0.000192992	0.00422497
rs4835265	4	145900258	chr4:145900195-145900321	C	A	-0.0126852	5.6e-24	0.973414	0.000123918	0.00371753
rs10075805	5	31021251	chr5:31021188-31021314	A	G	0.00803412	1.9e-15	-0.989956	0.000338837	0.00544627
rs3936511	5	56564954	chr5:56564891-56565017	A	G	-0.00821542	1.5e-12	-0.315473	0.000223901	0.00453399
rs62375243	5	133097605	chr5:133097542-133097668	G	A	0.00545619	1.9e-07	-1.09512	0.000346264	0.00546377
rs2289850	5	157326276	chr5:157326213-157326339	T	C	0.0069677	0.00051	1.49746	0.000443564	0.00589035
rs72657622	6	21939692	chr6:21939629-21939755	C	A	0.00152983	0.13	-0.173641	0.000110105	0.00371753
rs9271609	6	32623820	chr6:32623757-32623883	T	C	-0.00445397	3.1e-06	-0.98016	3.1892e-05	0.00234841
rs151214526	6	34260472	chr6:34260409-34260535	G	A	-0.01553	7.1e-13	0.366313	0.000900189	0.00783376
rs201125744	6	35317121	chr6:35317058-35317184	A	T	NA	NA	1.07688	0.00044426	0.00589035
rs2274514	6	42966762	chr6:42966699-42966825	C	T	3.03687e-05	0.97	-1.21275	3.1834e-05	0.00234841
rs75940653	6	80713021	chr6:80712958-80713084	C	T	-0.00903871	5.9e-08	-1.31117	0.000136841	0.00376965
rs608662	6	139518307	chr6:139518244-139518370	G	A	0.00569448	4.7e-10	-0.681947	6.82737e-05	0.00296259
rs3127188	6	158801512	chr6:158801449-158801575	A	G	0.00262539	0.0053	0.727244	4.10695e-05	0.0023525
rs13235365	7	6416460	chr7:6416397-6416523	C	T	0.000685461	0.5	-0.335838	0.000992531	0.00817576
rs12531540	7	28123055	chr7:28122992-28123118	C	T	0.006573	5.5e-13	-0.193459	0.000119634	0.00371753
rs35866503	7	73591446	chr7:73591383-73591509	C	T	0.00888535	6.5e-15	-0.510101	0.00112299	0.00852774
rs10452935	7	87464931	chr7:87464868-87464994	A	T	0.00232544	0.049	-0.569575	0.000316502	0.00527665
rs11770163	7	116777794	chr7:116777731-116777857	G	C	-0.00553974	1.1e-08	1.09137	2.4555e-05	0.00213102
rs34282904	7	130749770	chr7:130749707-130749833	G	A	0.00510401	2.5e-08	0.373863	0.000400866	0.00583295
rs11979450	7	135258305	chr7:135258242-135258368	C	T	0.00194845	0.048	-1.58077	0.000903061	0.00783376
rs2169387	8	9323885	chr8:9323822-9323948	A	G	0.00376244	0.013	0.479899	0.000839	0.00772261
rs4128744	8	20062144	chr8:20062081-20062207	C	T	0.00790953	3.1e-09	-0.199529	0.000696714	0.00711351
rs28571765	8	54536721	chr8:54536658-54536784	T	C	-0.00319441	0.0044	-0.470024	0.00131538	0.00934361
rs12675900	8	71557070	chr8:71557007-71557133	A	G	-0.00946273	4e-09	-0.777551	0.00108793	0.00842713
rs4734654	8	102657763	chr8:102657700-102657826	A	G	0.00171508	0.069	0.690512	4.46336e-05	0.0023525
rs6982502	8	125467120	chr8:125467057-125467183	C	T	0.0105278	9e-31	-0.52699	0.000493925	0.00602137
rs72697645	8	144489722	chr8:144489659-144489785	G	A	-0.00167698	0.069	-0.505855	3.60482e-05	0.0023525
rs1658973	9	6665097	chr9:6665034-6665160	A	T	-0.00107689	0.41	-2.23876	2.37249e-06	0.000960857
rs60150206	9	95499941	chr9:95499878-95500004	G	A	0.00279299	0.08	0.914477	0.000257888	0.00489585
rs3793569	9	109386034	chr9:109385971-109386097	A	G	0.00078241	0.54	-0.575631	0.000307913	0.00525947
rs7470777	9	133239789	chr9:133239726-133239852	A	G	-0.00456635	0.017	0.548502	0.000135721	0.00376965
rs10764006	10	34790946	chr10:34790883-34791009	A	T	-0.00484764	2.7e-06	0.283554	6.95707e-07	0.000422642
rs11818687	10	77877951	chr10:77877888-77878014	C	T	-0.00580842	1.5e-09	-0.234824	0.00142588	0.0097328
rs780156	10	79145276	chr10:79145213-79145339	C	T	-0.00568256	1.1e-09	-0.566221	0.000853452	0.00778079
rs7908382	10	88028881	chr10:88028818-88028944	T	C	-0.00350384	0.00078	0.31614	0.000882819	0.00783376
rs45587331	10	96700824	chr10:96700761-96700887	G	A	-0.000431808	0.71	-0.193752	0.000726893	0.00723914
rs7906181	10	100061926	chr10:100061863-100061989	T	C	0.00462339	4.2e-07	-0.441815	0.000177258	0.0041235
rs79356410	10	102347434	chr10:102347371-102347497	C	T	0.000600361	0.74	-0.206152	2.22929e-05	0.00213102
rs55645497	10	112225671	chr10:112225608-112225734	T	A	0.00146787	0.22	0.555556	0.000891493	0.00783376
rs4128598	10	113026180	chr10:113026117-113026243	A	G	-0.00527637	7.7e-09	1.25868	0.000109883	0.00371753
rs10128627	11	65403129	chr11:65403066-65403192	T	C	0.000714602	0.56	0.997731	0.000904424	0.00783376
rs61905078	11	116725593	chr11:116725530-116725656	A	C	-0.0124737	1e-12	-1.19642	7.65328e-05	0.00320512
rs2509121	11	119057542	chr11:119057479-119057605	C	T	-0.00135789	0.15	0.279947	0.000607193	0.00655218
rs2417886	12	20897063	chr12:20897000-20897126	C	T	-0.00496595	0.00011	-0.998884	0.00147929	0.00988057
rs7132434	12	26319629	chr12:26319566-26319692	A	G	0.00490526	4.1e-06	-1.21065	0.000309119	0.00525947
rs7302145	12	52880989	chr12:52880926-52881052	G	A	0.000181547	0.85	0.394376	0.000457856	0.00594968
rs2686380	12	121179904	chr12:121179841-121179967	C	T	-0.000318866	0.73	-2.14493	1.59289e-05	0.00193536
rs28639626	12	122114495	chr12:122114432-122114558	T	C	0.00205483	0.024	0.689716	1.24897e-05	0.0018918
rs11621792	14	24402720	chr14:24402657-24402783	C	T	-0.000973611	0.29	0.553166	0.00137717	0.00950713
rs12898346	15	78761775	chr15:78761712-78761838	T	C	0.000993832	0.29	0.333967	0.000104126	0.00371753
rs7201850	16	53787950	chr16:53787887-53788013	C	T	0.000611161	0.51	0.547378	6.09971e-05	0.00285044
rs113599059	16	56615072	chr16:56615009-56615135	C	A	3.30744e-05	0.98	-0.67557	0.000180951	0.00414821
rs113571835	16	58589374	chr16:58589311-58589437	A	G	-0.00112236	0.22	0.471514	0.00129202	0.00934361
rs73575083	16	79713958	chr16:79713895-79714021	A	G	-0.0018181	0.063	-0.348895	0.00041536	0.00584091
rs12939020	17	18046849	chr17:18046786-18046912	G	A	0.00364957	0.00023	1.20979	0.000417452	0.00584091
rs2727318	17	63883024	chr17:63882961-63883087	C	T	0.000706644	0.47	-2.47868	4.25116e-07	0.000414882
rs76375367	17	66142666	chr17:66142603-66142729	G	A	-0.00426852	0.034	-0.812154	0.00118941	0.00883874
rs3936134	17	67818266	chr17:67818203-67818329	C	G	-0.007403	3.3e-07	-1.33405	2.31945e-05	0.00213102
rs4793265	17	70484701	chr17:70484638-70484764	G	A	0.00382003	2.9e-05	-0.433709	2.12627e-05	0.00213102
rs9900122	17	75845621	chr17:75845558-75845684	T	C	0.00167036	0.09	0.346046	0.000117247	0.00371753
rs10153315	17	81514746	chr17:81514683-81514809	T	C	-0.00454387	9.6e-07	0.726617	0.000720039	0.00721988
rs4640266	18	58464633	chr18:58464570-58464696	T	G	0.00804682	1.4e-14	0.732439	0.00010753	0.00371753
rs2033493	19	10230178	chr19:10230115-10230241	A	C	0.000577673	0.62	1.03299	4.04406e-05	0.0023525
rs7252638	19	15870215	chr19:15870152-15870278	G	C	0.00215473	0.024	0.174696	0.000387861	0.00571214
rs12986046	19	17749239	chr19:17749176-17749302	T	C	-0.00212967	0.02	0.273362	0.0013273	0.00934361
rs60321073	19	19388789	chr19:19388726-19388852	A	G	-0.00441036	0.00021	-0.291516	2.00947e-05	0.00213102
rs10425678	19	33486490	chr19:33486427-33486553	T	C	0.00585192	1.7e-10	0.52969	4.93769e-05	0.00244869
rs73045269	19	41319286	chr19:41319223-41319349	C	T	-0.00530153	1.2e-05	-0.489302	4.44148e-05	0.0023525
rs11667244	19	47076928	chr19:47076865-47076991	A	G	0.00218092	0.031	0.531193	0.00035194	0.0054909
rs427248	19	48737758	chr19:48737695-48737821	C	T	-0.00591891	1.1e-10	-0.952109	6.07513e-06	0.00147626
rs6058059	20	34482354	chr20:34482291-34482417	C	T	-0.00301311	0.00095	-0.910298	5.122e-07	0.000414882
rs1883711	20	40551182	chr20:40551119-40551245	G	C	-0.00841141	0.0016	-1.40595	0.000270984	0.00505154
rs6063046	20	46967739	chr20:46967676-46967802	A	G	0.00577901	1.2e-08	0.733585	0.000644807	0.00672481
rs2427301	20	62374286	chr20:62374223-62374349	G	A	-0.00335194	0.00097	-0.272723	0.000191981	0.00422497
rs7280960	21	29034026	chr21:29033963-29034089	G	A	0.00484982	0.00097	-0.806165	0.00010656	0.00371753
rs7275247	21	32426548	chr21:32426485-32426611	A	G	-0.0018442	0.23	0.317626	0.000928161	0.00794166
rs4817988	21	39096912	chr21:39096849-39096975	G	A	-0.0020289	0.049	-0.949192	0.000174777	0.00412337
rs12158906	22	17954616	chr22:17954553-17954679	A	G	0.00916166	9.6e-18	-1.96882	2.50327e-08	6.08295e-05
rs131468	22	24669229	chr22:24669166-24669292	T	C	0.00663706	1.3e-10	-0.899197	1.85217e-05	0.00213102
rs4352308	22	28735800	chr22:28735737-28735863	C	T	-0.00525993	1.3e-07	-0.277459	0.000743244	0.0073183
rs133024	22	38178059	chr22:38177996-38178122	A	G	0.00310433	0.00067	0.800144	0.000320127	0.00529189
rs11090620	22	43979862	chr22:43979799-43979925	C	T	-0.005147	6.7e-07	0.983869	1.47918e-05	0.0018918
rs10854887	22	50424794	chr22:50424731-50424857	T	C	0.000251841	0.79	0.957925	0.000246239	0.0048255
