# Supplementary material for: Integrative functional genomics reveals transcriptional regulatory function of risk alleles for metabolic liver disease
Source: Research Square preprint supplement (doi:10.21203/rs.3.rs-6984670/v1), 2025-10-23
Supplement: Supplementary file 3 [file 1c9a19d6407d26f71bfc6201.xlsx]

## Sheet: 9 missense
Table S8. Nine well known missense variants for PRS construction
									histology-defined NAFLD cohorts						radiologic imaging cohorts				chronic ALT cohorts
Gene	Coding	Consequence	AA.change	chr	bp_38	EA	NEA	EAF	Beta	SE	P-value	Control	Case	N	Beta	SE	P-value	N	Beta	SE	P-value	Control	Case	N
PNPLA3	rs738409	MISSENSE	p.Ile148Met	22	43928847	G	C	0.2921	0.6863	0.0254	9.96e-161	7397	56785	64182	0.1249	0.0047	5.4e-155	44289	0.2667	0.0076	3.99e-273	90408	128187	218595
ERLIN1	rs2862954	MISSENSE	p.Ile291Val	10	100152307	C	T	0.4625	-0.1247	0.0236	1.337e-07	7397	56785	64182	0.005	0.0047	0.2931	44289	-0.1519	0.0067	2.65e-112	90408	128187	218595
SERPINA1	rs28929474	MISSENSE	p.Glu366Lys	14	94378610	T	C	0.0213	0.5428	0.0757	7.277e-13	7397	56785	64182	-0.0038	0.0047	0.4186	44289	0.4915	0.0272	9.007e-73	90408	128187	218595
TM6SF2	rs58542926	MISSENSE	p.Glu167Lys	19	19268740	T	C	0.0813	0.5324	0.042	8.227e-37	7397	56785	64182	0.106	0.0047	3.38e-112	44289	0.2091	0.0126	6.539e-62	90408	128187	218595
MTARC1	rs2642438	MISSENSE	p.Thr165Ala	1	220796686	A	G	0.2784	-0.18	0.0267	1.502e-11	7397	56785	64182	-0.033	0.0047	2.258e-12	44289	-0.0747	0.0074	6.648e-24	90408	128187	218595
GPAM	rs2792751	MISSENSE	p.Ile43Val	10	112180571	T	C	0.2994	0.1268	0.0251	4.184e-07	7397	56785	64182	0.0376	0.0047	1.462e-15	44289	0.0766	0.0077	1.749e-23	90408	128187	218595
APOE	rs429358	MISSENSE	p.Cys130Arg	19	44908684	C	T	0.2157	-0.1554	0.0292	1.053e-07	7397	56785	64182	-0.0388	0.0047	1.844e-16	44289	-0.0722	0.0078	2.21e-20	90408	128187	218595
PPARG	rs1801282	MISSENSE	p.Pro12Ala	3	12351626	G	C	0.117	-0.0816	0.0364	2.5E-02	7397	56785	64182	-0.0176	0.0047	0.0001859	44289	-0.0675	0.0108	3.39e-10	90408	128187	218595
APOH	rs1801689	MISSENSE	p.Cys325Gly	17	66214462	C	A	0.0307	0.2604	0.0647	5.645e-05	7397	56785	64182	0.0229	0.0047	1.243e-06	44289	0.1699	0.0193	1.462e-18	90408	128187	218595
AA.change, Amino Acid Change
chr, Chromosome
bp_38, Base Pair Position (GRCh38/hg38 genome build)
EA, Effect Allele
NEA, Non-Effect Allele
EAF, Effect Allele Frequency
Beta, Effect Size Estimate
SE, Standard Error of Beta
N, Number
