# Supplementary material for: Integrative functional genomics reveals transcriptional regulatory function of risk alleles for metabolic liver disease
Source: Research Square preprint supplement (doi:10.21203/rs.3.rs-6984670/v1), 2025-10-23
Supplement: Supplementary file 4 [file 253bcc974497f7bd2049a765.xlsx]

## Sheet: Lx2_TGFb_DAVs
Table S5. DAVs identified in LX-2 treated with TGFb.
coordination	log2(Fold change)	pValue	FDR	rsid
chr1:11820611-11820737	0.365045	0.0012257	0.0067422	rs149764880
chr1:16146956-16147082	0.418713	0.000192937	0.00245296	rs1566145
chr1:16173355-16173481	-0.696498	0.000172221	0.00229417	rs6661012
chr1:16198991-16199117	-0.216455	0.00108066	0.00620215	rs221032
chr1:16199329-16199455	0.580229	0.000786735	0.00528177	rs221033
chr1:16293602-16293728	0.659024	1.99646e-05	0.000777389	rs2994142
chr1:203577162-203577288	-3.97995	1.26958e-05	0.000684404	rs2821220
chr1:2222428-2222554	-0.148269	0.0014693	0.00746932	rs183072420
chr1:2234416-2234542	0.309234	0.00217269	0.00924213	rs12061341
chr1:23164159-23164285	-0.680453	0.000481699	0.00394762	rs140552475
chr1:23172845-23172971	-1.39815	1.38751e-05	0.000684404	rs116399264
chr1:28287896-28288022	0.851099	0.000733533	0.00511218	rs61551936
chr1:50424899-50425025	-0.478812	0.000302256	0.00307891	rs1278529
chr1:62458129-62458255	-0.333487	0.000976886	0.00584515	rs12037659
chr1:62689615-62689741	-1.63223	1.70467e-05	0.000738924	rs10889356
chr1:62705329-62705455	3.19635	3.5824e-05	0.00108289	rs6682423
chr1:88653952-88654078	-1.25372	5.26894e-05	0.00125808	rs7530690
chr1:88818362-88818488	0.503984	0.00154827	0.00765366	rs1085563
chr1:93287362-93287488	-0.408207	5.03179e-05	0.00124433	rs61799516
chr10:100080299-100080425	2.23186	0.000278986	0.00294214	rs11596211
chr10:100095411-100095537	1.39328	4.82778e-05	0.00124433	rs12765091
chr10:100095603-100095729	0.690114	7.76866e-05	0.00158568	rs4375373
chr10:100111928-100112054	-1.13376	0.00015783	0.00218288	rs12783521
chr10:100140046-100140172	-1.01436	0.00051997	0.00407444	rs12413812
chr10:102347371-102347497	-0.437642	5.03863e-07	0.000255055	rs79356410
chr10:102438708-102438834	-1.5713	0.000146833	0.00209478	rs117793008
chr10:112143006-112143132	-0.425324	0.000202653	0.00247785	rs2803606
chr10:112240595-112240721	0.341584	0.00011695	0.00187342	rs12416473
chr10:112924155-112924281	-0.474824	0.00172336	0.00803281	rs12255439
chr10:113017574-113017700	-0.557831	0.000172009	0.00229417	rs7918599
chr10:113026117-113026243	0.413865	0.000400777	0.00362274	rs4128598
chr10:113053225-113053351	-0.395511	0.00166167	0.00793526	rs12718338
chr10:113057187-113057313	-2.71981	6.42524e-06	0.000577386	rs11196211
chr10:34790883-34791009	0.246384	0.000609984	0.00456766	rs10764006
chr10:72906244-72906370	2.86449	7.59053e-06	0.000586532	rs2394931
chr10:77822358-77822484	-0.312678	0.00048699	0.00394762	rs10430528
chr10:77920578-77920704	1.20906	8.23988e-05	0.00160806	rs2278218
chr10:79145213-79145339	-0.589023	0.00124401	0.00675663	rs780156
chr10:99848910-99849036	-0.939978	1.21875e-05	0.000684404	rs111866537
chr11:116859959-116860085	-0.214998	0.00111836	0.00633238	rs567312
chr11:117010019-117010145	0.244657	0.00190855	0.00856477	rs7127881
chr11:117030770-117030896	-4.40859	3.03442e-05	0.000997418	rs11216242
chr11:117121297-117121423	-0.355925	0.00237461	0.00985269	rs7106437
chr11:119068714-119068840	0.307712	0.000485124	0.00394762	rs10892327
chr11:119083293-119083419	0.415152	0.00170794	0.00803281	rs7938944
chr11:57794634-57794760	2.28346	4.45911e-06	0.000577386	rs11229130
chr11:61775964-61776090	0.136986	0.000922224	0.00579193	rs174528
chr11:61781490-61781616	-0.251744	0.000229866	0.00268106	rs174533
chr12:10464069-10464195	-2.7272	0.000196467	0.00245296	rs7342353
chr12:121168193-121168319	0.544514	0.000299809	0.00307405	rs2857590
chr12:121171042-121171168	-1.21791	3.16935e-05	0.00102746	rs2567989
chr12:121172087-121172213	0.657615	3.57765e-05	0.00108289	rs2686374
chr12:121176471-121176597	0.308076	0.00162702	0.00785516	rs2686376
chr12:121176472-121176598	0.268172	0.000494526	0.0039609	rs2686377
chr12:121177920-121178046	0.270741	0.000949286	0.00579883	rs7137047
chr12:121179841-121179967	-0.955698	5.06387e-05	0.00124433	rs2686380
chr12:121182900-121183026	2.15766	4.55084e-07	0.000255055	rs2915641
chr12:122116679-122116805	-0.595653	0.000125381	0.00193499	rs28737311
chr12:122123545-122123671	-0.912377	4.65197e-05	0.00122647	rs11608788
chr12:123266138-123266264	0.148495	0.000293798	0.00303512	rs4553407
chr12:123332966-123333092	-0.606483	0.000119638	0.00188773	rs11611680
chr12:20897000-20897126	-0.604479	0.000415527	0.00369017	rs2417886
chr12:52901547-52901673	2.96202	1.54146e-05	0.000722488	rs1799872
chr15:78683450-78683576	-0.560371	0.00186515	0.00844488	rs72743199
chr15:78738288-78738414	0.832603	2.62464e-06	0.00049841	rs11853608
chr15:78761606-78761732	-0.309123	0.00152995	0.00759276	rs12916326
chr15:89804044-89804170	-0.292409	0.00151893	0.00758356	rs41276914
chr16:53786091-53786217	2.53304	5.22271e-06	0.000577386	rs11075992
chr16:53786838-53786964	0.426747	0.000782543	0.0052676	rs9937709
chr16:58568098-58568224	-2.74197	4.92165e-05	0.00124433	rs112412326
chr16:58576290-58576416	-1.53737	0.000134414	0.00201266	rs9936144
chr17:18030649-18030775	0.15962	0.00212423	0.00914358	rs28555361
chr17:18051351-18051477	1.00959	0.0017024	0.00803281	rs8080602
chr17:18063147-18063273	0.401419	0.00220189	0.00932943	rs1597700112
chr17:63685762-63685888	4.43759	2.86873e-06	0.00049841	rs3785574
chr17:63882961-63883087	-1.46812	0.000336905	0.00327964	rs2727318
chr17:63899825-63899951	0.373438	0.000189786	0.00245296	rs2854160
chr17:66194739-66194865	0.607235	3.28173e-05	0.00103826	rs9906486
chr17:67818203-67818329	-1.18157	1.83928e-05	0.000738924	rs3936134
chr17:67851146-67851272	0.985885	0.000284468	0.00296292	rs7212293
chr17:67852815-67852941	0.357162	0.000214209	0.00254536	rs4791048
chr17:67884360-67884486	0.629814	0.000424135	0.00374037	rs115210018
chr17:68043439-68043565	-0.319865	0.0017751	0.0082135	rs35594666
chr17:68052500-68052626	-0.612723	9.762e-06	0.000607728	rs34503060
chr17:68065005-68065131	-0.729707	3.207e-05	0.00102746	rs62084740
chr17:68084035-68084161	0.491142	9.94791e-05	0.00176071	rs62084748
chr17:75313194-75313320	0.395368	4.84396e-05	0.00124433	rs55762977
chr17:75313211-75313337	0.503351	0.000463695	0.0038872	rs55653371
chr17:75368481-75368607	-0.723599	0.000253817	0.00279309	rs2385266
chr17:75403454-75403580	0.275977	0.00165745	0.00793009	rs12604003
chr17:75845558-75845684	-0.30007	0.00221997	0.009349	rs9900122
chr18:58473892-58474018	-0.437222	0.00141962	0.00734776	rs12455073
chr18:58474383-58474509	-1.64912	4.16104e-05	0.00114474	rs7234605
chr18:58487169-58487295	-1.46182	4.76184e-07	0.000255055	rs4384677
chr19:15870152-15870278	0.193012	0.000199866	0.00245564	rs7252638
chr19:17733765-17733891	0.727898	8.01775e-05	0.00160629	rs3787026
chr19:17743651-17743777	1.36431	4.27746e-05	0.00116411	rs9630902
chr19:19172832-19172958	0.995699	0.000208567	0.00252739	rs60636572
chr19:19209953-19210079	1.80645	9.84466e-06	0.000607728	rs150057262
chr19:19262817-19262943	-0.599327	0.000193838	0.00245296	rs2074296
chr19:19325982-19326108	0.211165	0.00145795	0.00744298	rs62135552
chr19:19373136-19373262	0.130431	0.00190584	0.00856477	rs59148799
chr19:19429019-19429145	0.21317	0.000221708	0.00262217	rs8182472
chr19:19441752-19441878	-0.45641	0.00102827	0.00601506	rs10408401
chr19:33403877-33404003	-1.89762	2.15462e-05	0.000826265	rs10422861
chr19:33415154-33415280	-1.19244	1.43317e-05	0.000684404	rs4805885
chr19:33503448-33503574	0.236261	0.00134908	0.00712843	rs3786920
chr19:48706019-48706145	-1.44719	5.99113e-06	0.000577386	rs2548459
chr19:48711775-48711901	-0.191733	0.00235222	0.00978012	rs4002471
chr19:48716139-48716265	0.195412	0.00044156	0.00384051	rs660745
chr19:48721646-48721772	0.536484	0.000105477	0.00182775	rs519757
chr19:48737695-48737821	-0.871587	2.33133e-06	0.00049841	rs427248
chr2:101011950-101012076	-2.78602	1.16982e-05	0.000684404	rs72821050
chr2:111941710-111941836	1.52244	1.92637e-06	0.00049841	rs10207820
chr2:113818678-113818804	-0.236819	0.000262228	0.00286077	rs6739861
chr2:164702311-164702437	-0.492434	0.000812822	0.00534589	rs13000026
chr2:164774250-164774376	-1.5083	2.30708e-06	0.00049841	rs355866
chr2:226059455-226059581	-0.541839	0.000193866	0.00245296	rs1522810
chr2:27385185-27385311	-1.45156	0.000534751	0.00413901	rs1647284
chr2:27424646-27424772	1.33907	7.6474e-06	0.000586532	rs11691432
chr2:27479096-27479222	-1.19749	0.000119199	0.00188773	rs780115
chr20:34330429-34330555	-0.59539	0.000753954	0.00513755	rs1205344
chr20:34334109-34334235	0.945722	0.000184885	0.00242458	rs551094207
chr20:34408820-34408946	0.256825	0.000737788	0.00511218	rs3761147
chr20:34410315-34410441	2.37523	6.98966e-05	0.0014928	rs1978829484
chr20:34477415-34477541	3.51788	0.000110227	0.0018599	rs6058057
chr20:34522935-34523061	0.382166	7.07766e-05	0.0014928	rs2378205
chr20:40551119-40551245	-1.19338	0.000224961	0.00264826	rs1883711
chr20:40601676-40601802	-0.225353	0.000146479	0.00209478	rs6102060
chr20:46967676-46967802	1.16763	6.95121e-05	0.0014928	rs6063046
chr20:62374223-62374349	-1.11259	0.000678569	0.00487914	rs2427301
chr21:39093545-39093671	-0.491103	0.000309084	0.0030949	rs2836878
chr22:17956409-17956535	0.465829	0.00139318	0.00726355	rs2003617
chr22:17975157-17975283	-1.50302	0.000877221	0.00559509	rs5992137
chr22:17975792-17975918	-0.374659	0.000114495	0.00187342	rs5992138
chr22:17975807-17975933	-0.421619	0.000318524	0.00312702	rs5992139
chr22:17976829-17976955	-1.71494	1.43999e-06	0.00049841	rs9605461
chr22:17977030-17977156	-1.02622	2.92235e-06	0.00049841	rs9605462
chr22:17980779-17980905	-0.512402	0.000616537	0.00460312	rs8140977
chr22:24599671-24599797	-0.598928	5.65887e-05	0.00132044	rs112403677
chr22:24613700-24613826	0.361433	0.000807518	0.00534589	rs5760498
chr22:24669154-24669280	-0.659563	8.2924e-05	0.00160806	rs131467
chr22:24669166-24669292	-0.503549	0.000380857	0.00351583	rs131468
chr22:28569997-28570123	3.58312	1.6982e-05	0.000738924	rs34593692
chr22:38174119-38174245	1.05929	0.00154112	0.00763321	rs133010
chr22:38174842-38174968	-0.479858	0.000243069	0.00273228	rs133013
chr22:43928733-43928859	-0.36215	0.000405294	0.00363758	rs139051
chr22:43975064-43975190	1.70872	1.29877e-05	0.000684404	rs79564131
chr22:43975087-43975213	3.21482	7.28934e-05	0.00152474	rs117130990
chr22:50420321-50420447	-0.595138	1.64046e-05	0.000738924	rs7410608
chr22:50424731-50424857	1.30632	9.63639e-06	0.000607728	rs10854887
chr3:12229818-12229944	-0.152376	0.0007007	0.00500981	rs56268840
chr3:12347346-12347472	1.76704	0.00065393	0.00478351	rs2048359876
chr3:12363434-12363560	-0.824466	0.00181017	0.00826993	rs113843561
chr3:12397825-12397951	0.185955	0.000434008	0.00381415	rs2938387
chr3:12654871-12654997	0.452129	8.86544e-06	0.000607728	rs7637392
chr3:157079373-157079499	0.275534	0.00087371	0.00559509	rs56082403
chr3:36978396-36978522	-0.328193	0.000504508	0.00400285	rs7615360
chr3:37034430-37034556	-0.160624	0.000147322	0.00209478	rs6784088
chr3:37051510-37051636	2.88186	8.68325e-05	0.0016401	rs1558529
chr3:37167393-37167519	-0.460558	1.40249e-05	0.000684404	rs11706079
chr3:37183284-37183410	-1.11848	9.81211e-05	0.0017489	rs11711937
chr3:37217115-37217241	-0.662723	5.14789e-05	0.00125282	rs1399178
chr4:87238156-87238282	-0.328991	0.000867163	0.00557053	rs35844368
chr4:87252477-87252603	1.15935	0.000107804	0.00183122	rs7656630
chr4:87309925-87310051	-0.165298	0.00156211	0.00770704	rs10433879
chr4:99360007-99360133	-1.16869	0.000116544	0.00187342	rs1229860
chr4:99546402-99546528	1.72062	0.000139987	0.00205993	rs6532820
chr4:99580470-99580596	-1.53715	0.000229382	0.00268106	rs6841211
chr5:133044529-133044655	-0.566692	0.000269075	0.00288572	rs6874885
chr5:157309540-157309666	-0.455079	1.90179e-08	4.81342e-05	rs17051932
chr5:31020351-31020477	1.76681	3.02675e-05	0.000997418	rs6888304
chr5:56500186-56500312	1.37885	2.70899e-05	0.00093924	rs72754139
chr6:139513669-139513795	-0.292024	0.000150121	0.00211032	rs654689
chr6:139514199-139514325	0.280109	0.000501421	0.00400285	rs2908522
chr6:139518244-139518370	-0.870543	0.000993755	0.0059181	rs608662
chr6:158799423-158799549	-2.42406	3.7651e-05	0.00108289	rs3102994
chr6:160347765-160347891	0.231166	0.000637121	0.00471507	rs551032
chr6:160349217-160349343	0.352682	0.00102658	0.00601506	rs474513
chr6:31400530-31400656	1.79255	0.000976845	0.00584515	rs2596539
chr6:31750556-31750682	0.754912	6.34969e-05	0.00142222	rs3117573
chr6:32400622-32400748	0.177871	0.0014586	0.00744298	rs3129956
chr6:32467716-32467842	0.217081	6.88644e-06	0.000580986	rs28895224
chr6:32475611-32475737	-0.622726	0.000309368	0.0030949	rs9378264
chr6:32478170-32478296	-2.74689	3.15075e-06	0.00049841	rs17209873
chr6:32484062-32484188	-0.419407	0.000958085	0.00582117	rs71565333
chr6:32538954-32539080	2.19046	2.43032e-05	0.000891469	rs75499602
chr6:32548889-32549015	-3.61723	0.000488189	0.00394762	rs62405640
chr6:32584337-32584463	-0.529055	9.41594e-05	0.00170701	rs9269962
chr6:32593094-32593220	-4.44048	1.59721e-05	0.000735008	rs28366302
chr6:32600306-32600432	-0.685149	6.60719e-05	0.00146422	rs35117964
chr6:32607056-32607182	-0.187366	0.000278759	0.00294214	rs7770010
chr6:32611727-32611853	1.74984	1.42413e-05	0.000684404	rs583177
chr6:32614772-32614898	-0.385449	0.00013328	0.00200793	rs3104414
chr6:32616079-32616205	-3.39724	5.69888e-06	0.000577386	rs33964890
chr6:32622661-32622787	-0.825875	2.97674e-06	0.00049841	rs9271573
chr6:32625990-32626116	0.674507	0.000150915	0.00211032	rs9271748
chr6:32626086-32626212	0.25407	0.00189153	0.0085338	rs9271755
chr6:32636759-32636885	-0.418153	0.000305116	0.00308899	rs9272364
chr6:32638787-32638913	2.11685	3.89514e-05	0.00110771	rs9272530
chr6:32640864-32640990	3.05782	7.2088e-06	0.000586532	rs9272663
chr6:32645391-32645517	-2.30593	1.00857e-05	0.000607781	rs9273173
chr6:34199861-34199987	-0.608621	0.000458853	0.0038872	rs373112324
chr6:34210013-34210139	-0.174729	0.00115256	0.00645383	rs185139895
chr6:34269543-34269669	0.300954	0.000579682	0.00439274	rs534912145
chr6:35317058-35317184	4.78105	0.000713704	0.00507412	rs201125744
chr6:42952168-42952294	0.363828	0.00213616	0.00916378	rs2104616
chr6:42956101-42956227	1.30133	0.000105211	0.00182775	rs12524845
chr6:42956240-42956366	-0.410678	0.00103136	0.00601506	rs112122607
chr6:42966699-42966825	-0.944536	1.32041e-05	0.000684404	rs2274514
chr6:80602660-80602786	-4.53383	2.20996e-05	0.000834836	rs76207624
chr7:130739148-130739274	3.68433	2.66107e-06	0.00049841	rs6973807
chr7:28118280-28118406	-0.349623	0.0004359	0.00381752	rs6945413
chr7:28122992-28123118	-0.247402	0.000106961	0.00182918	rs12531540
chr7:28216558-28216684	-1.37849	3.32596e-05	0.00103926	rs498475
chr7:6422220-6422346	-0.766155	0.00062093	0.00462227	rs12532493
chr7:6437442-6437568	-0.758061	9.2659e-05	0.00169942	rs13221129
chr7:73631090-73631216	0.925958	1.75664e-05	0.000738924	rs7784668
chr8:115602253-115602379	2.917	6.02282e-06	0.000577386	rs2737207
chr8:125467057-125467183	-0.431841	0.00136211	0.0071573	rs6982502
chr8:19992415-19992541	-0.993225	4.6855e-07	0.000255055	rs114964604
chr8:20005933-20006059	0.529986	0.000647083	0.00477483	rs2119689
chr8:20072204-20072330	2.73207	5.77681e-06	0.000577386	rs13439782
chr8:71523206-71523332	-0.432875	5.54238e-05	0.00131101	rs71525127
chr8:71548316-71548442	4.01778	5.26735e-05	0.00125808	rs10112467
chr8:94914599-94914725	-0.387013	0.000863922	0.00557053	rs13262110
chr9:6664645-6664771	0.226559	0.00112515	0.00634244	rs1755618
chr9:95484859-95484985	-3.33649	8.06528e-06	0.000600389	rs28474857
chr9:95510960-95511086	-0.474995	0.00031335	0.00309879	rs145965565
chr6:32531310-32531436	1.09381	1.33364e-05	0.000684404	rs75901433
chr12:123366389-123366515	-0.894212	0.000933613	0.00579883	rs1593441316
chr11:57871482-57871608	0.216565	0.00134356	0.00712843	rs7936998
chr6:32640821-32640947	1.18777	0.000115235	0.00187342	rs9272659
chr14:103098970-103099096	-0.407751	0.000242597	0.00273228	rs62006947
chr3:37159564-37159690	0.877226	0.00023987	0.00273228	rs2175881
chr17:75321500-75321626	-1.95744	0.000252407	0.00279309	rs12946365
chr2:226059430-226059556	-0.534765	0.000793803	0.0052914	rs62189028
chr10:113013786-113013912	0.53325	0.00119099	0.00659608	rs55899248
chr6:32625793-32625919	-2.04473	0.000135184	0.00201266	rs9271733
chr15:66569931-66570057	0.263073	0.00148599	0.00753715	rs58507315
chr11:47366600-47366726	-0.654428	0.000389346	0.00356283	rs12801188
chr8:19992183-19992309	0.561132	9.41282e-06	0.000607728	rs17091905
chr6:34260409-34260535	0.42085	2.48208e-05	0.000897448	rs151214526
chr1:88896021-88896147	2.15932	1.78654e-05	0.000738924	rs10922504
chr17:18046786-18046912	1.25792	0.000602988	0.00452868	rs12939020
chr8:54509146-54509272	0.528332	0.000812535	0.00534589	rs56204645
chr4:87310650-87310776	-0.308437	0.000341892	0.00328254	rs28636836
chr3:37219842-37219968	-1.50039	1.78789e-05	0.000738924	rs11708049
chr19:17734022-17734148	0.2816	0.000469249	0.0039197	rs7253117
chr6:158777635-158777761	0.433789	2.35133e-05	0.000875177	rs3102971
chr6:42960957-42961083	0.226599	0.00163217	0.00785516	rs2296805
chr2:111983457-111983583	-0.220198	5.73879e-05	0.00132044	rs10188640
chr6:32622623-32622749	0.299123	0.00040387	0.00363758	rs9271568
chr8:19958045-19958171	0.518832	9.50962e-05	0.00170701	rs289
chr2:27388539-27388665	3.18329	0.000112371	0.00187113	rs7594812
chr20:40602403-40602529	2.85969	4.9591e-05	0.00124433	rs6124255
chr6:31384237-31384363	0.820935	0.000128996	0.0019668	rs28752475
chr1:16209990-16210116	-0.21948	0.00235326	0.00978012	rs221062
chr6:32635686-32635812	1.03176	0.00173976	0.00807952	rs9272271
chr19:17747488-17747614	-0.367734	0.000949831	0.00579883	rs28403253
chr6:32622642-32622768	-0.437447	0.000976841	0.00584515	rs2395224
chr22:43975463-43975589	0.552073	0.000211942	0.0025423	rs61473277
chr6:34259643-34259769	0.20199	0.00240466	0.00991237	rs115450053
chr6:42973009-42973135	1.01583	0.00117055	0.00651004	rs9296406
chr18:58464570-58464696	0.487686	4.59379e-05	0.00122388	rs4640266
chr15:89804037-89804163	0.194523	0.000524369	0.00409623	rs55977698
chr1:16102414-16102540	-0.976804	0.000167617	0.00228283	rs4434833
chr7:73467414-73467540	-0.230584	0.000461617	0.0038872	rs71556715
chr22:38175987-38176113	-0.406999	0.0010338	0.00601506	rs75387
chr6:31384936-31385062	1.58361	0.000353754	0.00334783	rs28366096
chr16:53787887-53788013	0.678194	0.000234512	0.00269795	rs7201850
chr22:43949828-43949954	-0.361125	0.00101452	0.00599939	rs13054885
chr19:17392545-17392671	-1.371	0.000562498	0.00431419	rs8107160
chr17:68004424-68004550	-2.00162	0.000111623	0.00187097	rs62086889
chr6:80480577-80480703	-0.30051	0.00152707	0.00759276	rs983211
chr14:24402657-24402783	2.09628	9.82371e-06	0.000607728	rs11621792
chr12:121173484-121173610	0.380255	0.00188454	0.00851746	rs1718160
chr21:39096849-39096975	-1.47906	2.52327e-05	0.000899492	rs4817988
chr8:71557752-71557878	-1.00258	0.00135262	0.00713224	rs28578663
chr3:12460381-12460507	0.537285	0.00076476	0.00517542	rs73029216
chr6:32634028-32634154	-0.111189	0.000940422	0.00579883	rs9272200
chr3:160610717-160610843	0.678344	0.000449436	0.00385601	rs4679903
chr8:94961346-94961472	-1.46658	8.88538e-05	0.00165913	rs28591375
chr3:12348922-12349048	0.23967	4.41389e-05	0.00118846	rs17036328
chr7:73637664-73637790	-1.72302	0.000756791	0.00513755	rs799165
chr3:37224571-37224697	0.545752	0.00125116	0.00678089	rs11926827
chr19:33444706-33444832	-0.703795	0.000329822	0.00322309	rs10402950
chr10:100053982-100054108	-2.05412	5.85146e-05	0.00133424	rs7084921
chr9:109371068-109371194	-1.17746	0.000739257	0.00511218	rs12551180
chr22:24599633-24599759	0.250924	0.00182314	0.00830073	rs2003757
chr19:19360369-19360495	0.469521	0.000591394	0.00446811	rs10419672
chr7:73633127-73633253	-0.47521	5.04493e-05	0.00124433	rs34899589
chr11:117095656-117095782	-1.48448	0.000463079	0.0038872	rs900012
chr11:57685508-57685634	-0.329669	1.81037e-05	0.000738924	rs12362166
chr6:31383341-31383467	0.246383	0.000171122	0.00229417	rs2523642
chr8:20009920-20010046	-0.886801	1.40188e-05	0.000684404	rs34327087
chr8:102657700-102657826	0.426677	0.00095005	0.00579883	rs4734654
chr8:22062478-22062604	-0.196346	0.00112512	0.00634244	rs12543764
chr10:99922094-99922220	-1.03598	0.000677955	0.00487914	rs72840103
chr7:135257518-135257644	1.59225	5.38336e-06	0.000577386	rs67633646
chr2:164755031-164755157	0.549007	0.00198795	0.00876568	rs1828213
chr14:94361253-94361379	-1.76143	5.83879e-06	0.000577386	rs72706230
chr12:272859-272985	-1.89371	0.000143335	0.00207304	rs1026172082
chr3:37134406-37134532	0.324642	0.00071988	0.0050819	rs9832138
chr2:201352130-201352256	1.04112	8.27392e-05	0.00160806	rs6726823
chr1:16117432-16117558	0.76346	0.00211129	0.00911294	rs61156959
chr10:69334685-69334811	1.00961	1.33229e-06	0.00049841	rs17476364
chr16:3056862-3056988	-0.409037	0.000513106	0.00405835	rs76385413
chr22:17932329-17932455	2.27783	0.000445558	0.00384883	rs5992904
chr6:32390361-32390487	-0.816606	9.48308e-05	0.00170701	rs3129950
chr11:94137109-94137235	-0.415441	0.000744086	0.00511762	rs7117339
chr5:133074244-133074370	0.459636	0.000344863	0.00328477	rs72801456
chr10:112922731-112922857	0.497658	0.00213373	0.00916378	rs3862012
chr19:33472797-33472923	-0.265574	0.00239579	0.00990919	rs10408013
chr12:26319566-26319692	-0.542987	0.000721519	0.0050819	rs7132434
chr21:29011143-29011269	0.436759	0.00106527	0.00614167	rs13048501
chr6:32642415-32642541	0.541497	0.000308722	0.0030949	rs9272774
chr6:32375396-32375522	1.30817	0.000165246	0.00227303	rs2894251
chr3:12355351-12355477	0.918019	0.000877618	0.00559509	rs71304101
chr19:19285744-19285870	-0.50837	0.00123197	0.0067422	rs188247550
chr10:77830083-77830209	0.988509	0.00083724	0.00543347	rs55854323
chr5:157326213-157326339	0.832023	0.00161315	0.00783661	rs2289850
chr11:22158698-22158824	0.512057	0.00171685	0.00803281	rs12290197
chr1:28263745-28263871	-0.666158	0.00037288	0.0034697	rs502273
chr3:155844548-155844674	1.14326	6.61565e-06	0.000577386	rs6441019
chr17:68047359-68047485	-0.30774	1.87538e-05	0.000741656	rs7405743
chr10:100046506-100046632	1.31407	3.70629e-05	0.00108289	rs7897739
chr12:122132149-122132275	-0.285313	0.00158998	0.00776951	rs7955571
chr2:168947101-168947227	1.82716	3.6008e-05	0.00108289	rs853784
chr6:32615259-32615385	-1.24998	0.000196741	0.00245296	rs6605556
chr19:19307994-19308120	-0.503867	0.00130496	0.00698278	rs73001020
chr8:8782599-8782725	-0.780051	0.000115482	0.00187342	rs693109
chr6:80643854-80643980	1.66944	0.000662431	0.00480405	rs77999505
chr19:15869810-15869936	0.394369	0.00149566	0.0075559	rs7256877
chr6:31387685-31387811	-1.0961	0.000153878	0.00213991	rs2596558
chr12:122139740-122139866	-0.772268	0.000276353	0.00293887	rs4758653
chr7:73562856-73562982	-0.427191	0.000243973	0.00273228	rs34594435
chr3:37193816-37193942	-0.597749	0.000142031	0.00207304	rs6762716
chr8:102676090-102676216	-0.390266	0.000198388	0.00245564	rs10106298
chr6:31759634-31759760	1.00323	0.00028354	0.00296292	rs3117577
chr3:37010516-37010642	0.556922	0.000934996	0.00579883	rs113956733
chr3:37006223-37006349	-0.495812	0.000990185	0.00591075	rs113479434
chr17:18049070-18049196	1.39606	0.000195853	0.00245296	rs8070731
chr2:113109214-113109340	0.76395	0.000250375	0.00279163	rs7580634
chr19:47076865-47076991	0.755903	4.08855e-05	0.00114133	rs11667244
chr2:111976057-111976183	-2.72292	6.71077e-05	0.00146422	rs66477683
chr14:103098644-103098770	0.757523	0.000722568	0.0050819	rs56956502
chr4:99350835-99350961	0.330979	0.00123401	0.0067422	rs1662047
chr1:219536121-219536247	-0.361286	0.00239606	0.00990919	rs1415290
chr11:119083421-119083547	-1.6968	0.000120286	0.00188773	rs7952700
chr2:111986277-111986403	-0.646551	0.000809806	0.00534589	rs1554214
chr5:131678627-131678753	-0.313282	0.000961734	0.00582117	rs250887
chr6:32619972-32620098	-2.2112	7.88162e-05	0.00159587	rs9271416
chr6:158775055-158775181	0.174174	6.25779e-06	0.000577386	rs3123105
chr20:34435942-34436068	2.04698	0.000741321	0.00511249	rs6120644
chr7:130749707-130749833	0.142565	0.00196015	0.00870375	rs34282904
chr19:19153250-19153376	0.802742	0.000124376	0.00193125	rs60450968
chr22:17980387-17980513	0.716434	0.00179384	0.00822503	rs9605472
chr3:125207841-125207967	-0.463137	0.00207635	0.00902962	rs9872582
chr6:158780738-158780864	-0.623646	0.000128353	0.0019668	rs3123108
chr2:226099183-226099309	-0.70933	8.43841e-05	0.00160806	rs13430421
chr1:23140505-23140631	0.51578	0.000490175	0.00395106	rs74902245
chr8:125447685-125447811	-1.23076	8.41589e-05	0.00160806	rs4871598
chr6:32645433-32645559	-0.749908	0.00136577	0.0071573	rs9273175
chr19:19367150-19367276	0.0641915	0.00228462	0.00955763	rs2905426
chr22:43958655-43958781	1.2541	7.72529e-05	0.00158568	rs9626064
chr4:145860532-145860658	-1.37782	0.000389927	0.00356283	rs4835261
chr5:56512525-56512651	-0.301445	0.00204145	0.0089393	rs60803019
chr6:31383293-31383419	-1.32594	0.000914478	0.00575757	rs2244490
chr6:32343023-32343149	1.96369	0.000503225	0.00400285	rs2849018
chr5:131984706-131984832	-1.01556	0.000241701	0.00273228	rs253942
chr3:37076187-37076313	1.37078	0.000494193	0.0039609	rs726769
chr19:17392852-17392978	1.10115	0.000422759	0.00374037	rs8108364
chr19:19179565-19179691	0.509272	0.00132293	0.00704912	rs10854010
chr7:6427757-6427883	-1.21319	0.000790752	0.0052914	rs12537894
chr2:164653006-164653132	-0.575076	0.000357632	0.00335247	rs7607886
chr6:31978997-31979123	0.782419	0.000532928	0.00413755	rs386480
chr2:100986224-100986350	-0.161719	0.00157326	0.00771979	rs72818971
chr16:79711712-79711838	0.341148	0.000310961	0.00309859	rs1916161596
chr20:34437303-34437429	0.709923	0.000553891	0.00426109	rs6120645
chr2:112017569-112017695	-0.251478	0.000302903	0.00307891	rs77120804
chr7:28192775-28192901	0.12857	0.00216645	0.00924191	rs849327
chr4:99537228-99537354	0.522736	0.00127689	0.00687618	rs10000018
chr16:53766779-53766905	-1.09079	7.56145e-05	0.00156869	rs9940128
chr4:76497752-76497878	1.42899	9.15531e-06	0.000607728	rs11730486
chr10:102232598-102232724	0.859949	7.06006e-05	0.0014928	rs140312320
chr6:32543144-32543270	0.843166	0.000391416	0.00356358	rs559903629
chr10:77817587-77817713	0.581755	0.000368509	0.00344168	rs10824577
chr6:32635616-32635742	-1.26598	9.1747e-05	0.00169498	rs115852844
chr1:93409751-93409877	-0.531707	0.00159841	0.00777997	rs2162276
chr22:24651469-24651595	1.02533	0.000131194	0.00198834	rs28448295
chr18:58444298-58444424	-0.876493	0.000930293	0.00579883	rs7234602
chr7:36045469-36045595	0.788029	2.90959e-05	0.00099516	rs2700938
chr4:87292593-87292719	-0.961316	3.67489e-05	0.00108289	rs6834314
chr6:32479082-32479208	0.35792	0.00113422	0.00637934	rs17203619
chr1:101193724-101193850	-1.96815	0.000282273	0.00296292	rs77666400
chr10:100082949-100083075	-0.394595	0.000865791	0.00557053	rs4606421
chr17:67884188-67884314	0.172977	0.0023346	0.00973456	rs6504545
chr11:108522775-108522901	0.992901	2.9526e-05	0.000996403	rs4753844
chr6:32490674-32490800	-2.67695	0.000438035	0.00382299	rs190685297
chr9:95453286-95453412	0.368047	0.000900437	0.00568331	rs28583690
chr6:32605722-32605848	0.384022	0.00121188	0.00669707	rs602457
chr19:10230115-10230241	1.19314	0.000264228	0.00287022	rs2033493
chr2:27487035-27487161	-0.875082	0.000599592	0.00451657	rs809059
chr7:73591995-73592121	-0.469083	8.91511e-05	0.00165913	rs13225660
chr5:133097863-133097989	-1.50862	0.000382004	0.00351583	rs4705880
chr8:19996926-19997052	0.533256	0.000414674	0.00369017	rs4425772
chr6:32640454-32640580	-1.76413	0.000444557	0.00384883	rs9272641
chr20:34399797-34399923	-0.425437	0.000960308	0.00582117	rs7271970
chr6:21921715-21921841	-1.66558	0.00018709	0.00244084	rs113214005
chr2:226227371-226227497	0.590208	0.000688457	0.00493622	rs2972149
chr8:94962082-94962208	0.865394	0.000231952	0.00269298	rs4735339
chr19:15872716-15872842	-0.665595	0.000896359	0.00568331	rs62107768
chr1:16120422-16120548	0.507652	0.000817938	0.00534935	rs17416878
chr12:52873773-52873899	-0.382125	0.000265957	0.00287131	rs10876379
chr2:113083892-113084018	0.259147	0.000485978	0.00394762	rs6750559
chr12:122141382-122141508	0.347773	0.000184529	0.00242458	rs7953704
chr3:12630988-12631114	0.736181	0.000649394	0.00477796	rs5746182
chr6:32593798-32593924	0.34473	0.00136585	0.0071573	rs35371668
chr4:145866026-145866152	0.322026	0.000116711	0.00187342	rs35146602
chr10:77921686-77921812	-0.563656	0.000342391	0.00328254	rs12220311
chr19:19472120-19472246	-0.693874	0.000709249	0.00505665	rs73002960
chr7:73628708-73628834	-0.887197	5.34374e-06	0.000577386	rs34958196
chr19:19510132-19510258	0.435995	0.000291217	0.00302078	rs56273306
chr10:102415829-102415955	-0.401886	0.00226842	0.00952135	rs79931565
chr3:12303168-12303294	0.441515	0.000106156	0.00182775	rs11712037
chr19:19606184-19606310	-0.653899	0.00203704	0.00893657	rs73004967
chr16:3055939-3056065	0.620813	0.00162555	0.00785516	rs55999592
chr13:106544491-106544617	1.05643	5.93515e-05	0.00134124	rs1594186659
chr15:78668124-78668250	-0.645665	0.000794442	0.0052914	rs6495314
chr10:102186660-102186786	-0.511304	0.00210687	0.00911294	rs75398587
chr6:32592064-32592190	-0.737398	0.00129546	0.00694665	rs35743245
chr16:58038603-58038729	0.257432	0.00183235	0.00832618	rs1436426
chr19:19346045-19346171	-0.18046	0.000120827	0.00188773	rs58489806
chr6:31834261-31834387	0.911121	0.00180334	0.00825362	rs3130476
chr6:32641862-32641988	-0.609933	0.000477193	0.00394698	rs9272741
chr6:32640381-32640507	0.510747	0.000737033	0.00511218	rs9272640
chr11:116930164-116930290	0.83791	0.000479025	0.00394762	rs10790167
chr3:36970545-36970671	-0.72336	0.000196536	0.00245296	rs11718237
chr10:34737150-34737276	-0.962487	0.000834643	0.00543055	rs10450314
chr22:17938992-17939118	-1.21958	0.00157385	0.00771979	rs7291304
chr2:226155874-226156000	0.687532	0.000661359	0.00480405	rs7578326
chr20:34502850-34502976	0.236066	8.45008e-05	0.00160806	rs6120666
chr6:130048663-130048789	1.83344	0.00150517	0.00757374	rs4279458
chr17:18016372-18016498	-0.619481	0.000299996	0.00307405	rs9913277
chr2:201313972-201314098	-0.278299	0.00133942	0.00712198	rs12612166
chr6:31392832-31392958	-0.788496	0.00065146	0.00477926	rs3094591
chr19:19184684-19184810	-0.523704	0.00149042	0.0075445	rs11668300
chr10:100278821-100278947	-0.624704	0.00134828	0.00712843	rs61871342
chr6:32618597-32618723	1.14365	0.00102004	0.00601506	rs562462
chr12:122057788-122057914	0.498093	0.00202903	0.00893125	rs28759327
chr15:78731361-78731487	0.578574	0.000573623	0.00435988	rs11639166
chr6:31902486-31902612	0.333163	0.00103289	0.00601506	rs558702
chr19:19348928-19349054	0.535658	0.00194746	0.00866258	rs12982276
chr11:94190332-94190458	0.230739	0.00140584	0.00730635	rs10765656
chr21:39092771-39092897	-0.433965	0.00126987	0.00685299	rs982411422
chr6:80765799-80765925	0.138762	0.00143308	0.00738286	rs77510078
chr2:27390101-27390227	0.612576	0.00025272	0.00279309	rs12476704
chr2:111987474-111987600	0.499102	0.000463822	0.0038872	rs13394651
chr3:36970070-36970196	0.0554956	0.000448563	0.00385601	rs58129217
chr19:54173244-54173370	-0.395813	0.000815296	0.00534589	rs626283
chr7:135258242-135258368	-0.861221	0.000392829	0.00356362	rs11979450
chr9:95482633-95482759	0.368374	0.000211625	0.0025423	rs28372566
chr1:16203260-16203386	-1.0567	0.000137187	0.00203053	rs221042
chr1:11067751-11067877	0.704745	0.00164693	0.00789465	rs2791658
chr12:52889351-52889477	0.353981	0.00122993	0.0067422	rs1907671
chr1:23185447-23185573	0.382177	0.0019301	0.00861879	rs55696148
chr19:18107737-18107863	-0.550735	0.000570985	0.0043529	rs67234314
chr6:32644197-32644323	0.41463	0.000568844	0.00434968	rs9273051
chr19:33482944-33483070	-2.41741	0.000148208	0.00209562	rs10420551
chr3:12273284-12273410	1.20759	0.00177149	0.00821182	rs4279078
chr22:43937751-43937877	-1.4719	3.74993e-05	0.00108289	rs2896019
chr8:20007935-20008061	-0.92573	0.000193691	0.00245296	rs35495249
chr5:157295355-157295481	-1.08847	0.00010086	0.00177275	rs17054431
chr10:77876340-77876466	0.672685	0.00214931	0.00918905	rs11002319
chr19:19325357-19325483	-0.461131	0.00221119	0.00933779	rs111234557
chr10:113036226-113036352	0.31841	0.00205848	0.00897376	rs7100927
chr22:17951209-17951335	-0.596095	0.000318755	0.00312702	rs35972244
chr9:133268952-133269078	-1.05848	0.00116181	0.00648913	rs8176663
chr4:87293073-87293199	-0.54445	0.00110794	0.00628743	rs4546210
chr2:168935848-168935974	0.200626	0.000813242	0.00534589	rs472614
chr3:12256752-12256878	0.271487	4.27439e-06	0.000577386	rs66615477
chr5:131865323-131865449	0.28594	0.000782532	0.0052676	rs1580878829
chr7:73573676-73573802	-0.629442	0.00168653	0.00802157	rs35659126
chr2:164651816-164651942	-0.348567	0.00143515	0.00738286	rs10184004
chr6:32619805-32619931	1.70296	0.000169261	0.0022909	rs9271410
chr17:75841167-75841293	0.432281	0.000963678	0.00582117	rs8074963
chr1:16125643-16125769	0.919817	5.73082e-05	0.00132044	rs11800805
chr6:32597933-32598059	0.784193	8.06002e-05	0.00160629	rs9270645
chr6:42947220-42947346	0.327763	0.00219539	0.00932306	rs9471972
chr1:16104215-16104341	-0.571693	0.000725072	0.00508354	rs61769926
chr10:17834641-17834767	1.42035	0.000266597	0.00287131	rs545193344
chr6:158777165-158777291	-0.32039	0.000354491	0.00334783	rs3127203
chr8:19997647-19997773	-0.503183	0.000271345	0.00289778	rs34564316
chr11:116927765-116927891	-0.439219	0.00163479	0.00785516	rs1446105
chr6:32625760-32625886	-0.970888	2.58609e-05	0.000909083	rs9271729
chr3:155848692-155848818	-0.931587	0.00178931	0.00822503	rs62286778
chr6:34254361-34254487	1.51939	0.000672562	0.00486358	rs116141873
chr1:16195711-16195837	1.40038	0.00161937	0.00785176	rs1985166
chr8:19986865-19986991	-1.54037	0.00113926	0.00639351	rs115129770
chr6:116006635-116006761	-0.631023	0.00205069	0.00896424	rs2351285
chr6:80712958-80713084	-0.455758	0.00211351	0.00911294	rs75940653
chr13:28448682-28448808	-1.24265	0.00031343	0.00309879	rs7985584
chr5:31035474-31035600	-0.591188	0.00196669	0.00871749	rs56318422
chr3:37105804-37105930	0.823104	0.00107106	0.00616105	rs6550455
chr6:31378650-31378776	0.532989	0.000937205	0.00579883	rs2523626
chr8:54524014-54524140	-0.199296	0.00139474	0.00726355	rs28387039
chr6:15464825-15464951	1.15569	0.00034239	0.00328254	rs2237137
chr1:88722798-88722924	0.503284	0.00226672	0.00952135	rs7533835
chr1:88745113-88745239	-0.681112	0.000213422	0.00254536	rs305219
chr19:47069667-47069793	-0.930423	0.0016907	0.00802157	rs2241388
chr6:32591167-32591293	-0.79721	0.00109092	0.00623279	rs9270475
chr1:11798837-11798963	1.36117	0.00171386	0.00803281	rs45553335
chr10:77769424-77769550	-0.506339	0.00198544	0.00876568	rs2579177
chr6:15476325-15476451	0.26131	0.000459823	0.0038872	rs2064097
chr6:80624669-80624795	0.689091	0.00131616	0.00702785	rs77615508
chr8:94933869-94933995	-0.90296	0.000199518	0.00245564	rs62523081
chr7:101233547-101233673	0.244797	0.00169242	0.00802157	rs1164681557
chr19:19554709-19554835	0.59289	0.00178067	0.00822104	rs34755166
chr2:112015154-112015280	0.753076	0.00121785	0.00671541	rs4525705
chr20:14690504-14690630	0.944429	0.001721	0.00803281	rs6110389
chr7:73615782-73615908	-0.716937	0.00106089	0.00613037	rs13229619
chr6:31973057-31973183	0.909306	0.000519805	0.00407444	rs389884
chr3:160631594-160631720	-0.56979	0.000174865	0.00231719	rs11711447
chr10:99849842-99849968	-0.699001	0.00037433	0.00347043	rs72838150
chr8:115583898-115584024	1.01204	0.00193117	0.00861879	rs6469603
chr15:51207285-51207411	0.433063	0.00172126	0.00803281	rs7167936
chr1:23145492-23145618	-0.506123	0.000357383	0.00335247	rs1200993
chr10:100285639-100285765	0.896095	0.00182347	0.00830073	rs61871345
chr10:113002415-113002541	0.509585	0.00145616	0.00744298	rs6585198
chr8:20011365-20011491	-0.584876	0.00075569	0.00513755	rs1441754
chr13:28450916-28451042	0.420413	0.00227373	0.00952784	rs6490304
chr6:32645170-32645296	0.579312	0.00149881	0.00755675	rs9273150
chr2:226034075-226034201	-0.965486	0.000898382	0.00568331	rs62189000
chr11:116862531-116862657	0.459971	0.000970791	0.00584515	rs6589575
chr1:50425478-50425604	-0.527426	0.000345219	0.00328477	rs1278526
chr1:62608708-62608834	0.240761	0.000408024	0.00364915	rs6678483
chr19:19401785-19401911	0.869501	0.00110564	0.00628743	rs10408596
chr20:34694913-34695039	-0.47592	0.000519926	0.00407444	rs8115656
chr9:109339961-109340087	0.891114	0.000456566	0.0038872	rs75835593
chr6:158824070-158824196	-0.471692	0.00173343	0.00806492	rs3123140
chr6:32490424-32490550	-0.228814	0.00172008	0.00803281	rs77311114
chr6:32606902-32607028	-1.49037	4.10354e-05	0.00114133	rs515185
chr8:6729446-6729572	0.241504	0.000142791	0.00207304	rs79128718
chr6:32483511-32483637	0.128009	0.00108494	0.00621261	rs28454881
chr11:47406125-47406251	-0.418477	0.000341886	0.00328254	rs11039221
chr22:24596236-24596362	0.14697	0.000928444	0.00579883	rs5751901
chr20:14701154-14701280	-1.36001	0.000208702	0.00252739	rs1932951
chr20:34338860-34338986	0.0920326	0.00179072	0.00822503	rs1008496455
chr6:163692667-163692793	0.545664	0.000856398	0.00554359	rs73029263
chr6:32613510-32613636	-0.166592	0.00214315	0.00917818	rs9271292
chr21:32432009-32432135	-0.910972	0.000242651	0.00273228	rs4817490
chr11:116834737-116834863	-0.316011	0.000233158	0.00269462	rs525028
chr10:34763970-34764096	-0.271811	0.000746386	0.00511952	rs11009925
chr3:37052051-37052177	0.916942	0.0012798	0.00687724	rs4678930
chr8:71600872-71600998	0.302786	0.00141534	0.00734064	rs13253114
chr10:96717601-96717727	-0.723208	0.00125581	0.00679155	rs61856817
chr5:133106508-133106634	0.497651	0.00152764	0.00759276	rs56083805
chr1:219568415-219568541	-0.989856	0.000732735	0.00511218	rs2820444
chr16:58631422-58631548	-0.228624	0.00104628	0.0060737	rs244908
chr8:20023484-20023610	0.825692	0.0010311	0.00601506	rs78404258
chr4:99545415-99545541	0.682057	0.00146966	0.00746932	rs11946292
chr2:168938410-168938536	-0.3981	0.0024001	0.00990971	rs482508
chr19:33365447-33365573	-0.583436	0.00171255	0.00803281	rs1559191
chr1:23171296-23171422	-0.650178	0.0018548	0.00841309	rs533778
chr10:100278865-100278991	0.390403	0.000255322	0.00279748	rs12254005
chr12:10431530-10431656	1.25871	0.000722831	0.0050819	rs76478238
chr2:111986873-111986999	0.605176	0.000483036	0.00394762	rs1996326
chr7:73633455-73633581	-0.566708	0.00123869	0.0067422	rs35703204
chr1:219463388-219463514	-0.850038	0.0019796	0.00875937	rs7546202
chr17:66142603-66142729	-0.903261	0.00220427	0.00932943	rs76375367
chr17:18010127-18010253	0.0713461	0.000529563	0.00412407	rs7212167
chr1:88797590-88797716	-0.22761	0.0016654	0.00793811	rs786909
chr11:57772923-57773049	0.468296	0.000475797	0.00394698	rs17455520
chr2:164775633-164775759	0.332935	0.000167762	0.00228283	rs355872
chr3:12226085-12226211	-1.03645	0.00047358	0.00394287	rs7616006
chr16:58568789-58568915	-0.529444	0.00105735	0.00612392	rs72790266
chr12:20887257-20887383	0.971851	0.000757135	0.00513755	rs34061909
chr16:58589311-58589437	0.193183	0.00192928	0.00861879	rs113571835
chr6:32621400-32621526	0.335244	0.00178323	0.00822104	rs9271494
chr11:116899738-116899864	0.540083	0.00221362	0.00933779	rs609177
chr6:32616313-32616439	0.995641	0.000626616	0.00465093	rs28383233
chr6:32538926-32539052	-0.266193	0.00193421	0.00861879	rs72853912
chr11:116729785-116729911	0.541983	0.00216898	0.00924191	rs61905081
chr5:157309912-157310038	-0.335872	0.000950816	0.00579883	rs2288070
chr9:133268834-133268960	0.283739	0.00100689	0.00596825	rs576125
chr3:149403414-149403540	0.801767	6.6885e-05	0.00146422	rs1576862467
chr10:100143138-100143264	0.701885	0.00163559	0.00785516	rs12354860
chr12:122104744-122104870	0.587655	0.00159259	0.00776951	rs36157560
chr22:24627314-24627440	1.00093	0.00116399	0.00648913	rs554654292
chr3:12611671-12611797	0.461941	0.000943451	0.00579883	rs3730269
chr8:20019020-20019146	0.209866	0.00054175	0.00418039	rs76737188
chr3:160514389-160514515	-0.580478	0.000823682	0.00537304	rs73875290
chr22:28248830-28248956	0.839084	0.00151216	0.00758356	rs134188
chr1:11064792-11064918	-0.255836	0.00142865	0.00737944	rs55924558
chr6:35289094-35289220	-0.213646	0.00123613	0.0067422	rs729925
chr19:15871785-15871911	0.400682	0.0015932	0.00776951	rs62107764
chr22:17951165-17951291	0.438383	0.0020853	0.00905298	rs5992134
chr19:33354474-33354600	0.229062	0.000656177	0.00478612	rs7248901
chr3:149387974-149388100	0.51181	0.00110698	0.00628743	rs4130915
chr1:11142291-11142417	-0.537754	0.00117289	0.00651004	rs12239187
chr6:31385955-31386081	0.2763	0.00144825	0.00743513	rs2596564
chr8:71575888-71576014	-0.65581	0.0020373	0.00893657	rs28837692
chr5:56506529-56506655	-0.597327	0.000929655	0.00579883	rs27984
chr6:32321112-32321238	-0.377183	0.00138035	0.0072183	rs7751715
chr12:10482799-10482925	-0.56323	0.00205996	0.00897376	rs7303771
chr10:112268659-112268785	-0.342027	0.00232449	0.00970839	rs17672352
chr1:16103342-16103468	-0.235733	0.000897087	0.00568331	rs4661696
chr8:54508991-54509117	-0.611505	0.00190387	0.00856477	rs10102164
chr3:136579342-136579468	0.305823	0.00157167	0.00771979	rs1576628366
chr1:16195898-16196024	0.747624	0.0009978	0.00592824	rs221026
chr17:47469412-47469538	-0.453625	0.00211332	0.00911294	rs67688344
chr22:43989640-43989766	0.422099	0.00151355	0.00758356	rs112902984
chr6:31384834-31384960	-0.647345	0.00151911	0.00758356	rs28366093
