# Supplementary material for: Integrative functional genomics reveals transcriptional regulatory function of risk alleles for metabolic liver disease
Source: Research Square preprint supplement (doi:10.21203/rs.3.rs-6984670/v1), 2025-10-23
Supplement: Supplementary file 5 [file 28ed16c000678dd7abbf266a.xlsx]

## Sheet: HepG2_Ctrl_DAVs
Table S2. DAVs identified in HepG2 cells.
coordination	log2(Fold change)	pValue	FDR	rsid
chr1:11820611-11820737	0.166366	0.00077609	0.0074248	rs149764880
chr1:16101748-16101874	-0.47888	0.000476807	0.00596871	rs79596669
chr1:16199329-16199455	0.429423	0.000411546	0.00584091	rs221033
chr1:23172845-23172971	-1.52264	6.50111e-05	0.00292033	rs116399264
chr1:28263696-28263822	0.188846	0.00016145	0.00400331	rs503048
chr1:28263745-28263871	-1.24171	2.03919e-05	0.00213102	rs502273
chr1:28287896-28288022	1.11444	0.000138065	0.00376965	rs61551936
chr1:62458129-62458255	-0.604988	0.000183792	0.00417398	rs12037659
chr1:88653952-88654078	-1.8104	8.88165e-06	0.00179853	rs7530690
chr1:93304752-93304878	-0.574293	0.000909419	0.00783648	rs11164897
chr10:100037127-100037253	-0.818782	7.60943e-06	0.00168099	rs11190375
chr10:100095603-100095729	0.790144	3.93175e-06	0.00119427	rs4375373
chr10:102347371-102347497	-0.206152	2.22929e-05	0.00213102	rs79356410
chr10:113026117-113026243	1.25868	0.000109883	0.00371753	rs4128598
chr10:34790883-34791009	0.283554	6.95707e-07	0.000422642	rs10764006
chr10:79145213-79145339	-0.566221	0.000853452	0.00778079	rs780156
chr10:88028818-88028944	0.31614	0.000882819	0.00783376	rs7908382
chr10:99844661-99844787	0.265103	0.000525588	0.00618171	rs72838129
chr11:116725530-116725656	-1.19642	7.65328e-05	0.00320512	rs61905078
chr11:117033578-117033704	-0.98857	2.43434e-05	0.00213102	rs4575311
chr11:119057479-119057605	0.279947	0.000607193	0.00655218	rs2509121
chr12:122114432-122114558	0.689716	1.24897e-05	0.0018918	rs28639626
chr12:122124026-122124152	0.549802	0.00042218	0.00584091	rs11057654
chr12:26319566-26319692	-1.21065	0.000309119	0.00525947	rs7132434
chr15:78760879-78761005	0.69559	0.000245668	0.0048255	rs4887096
chr15:78761409-78761535	-0.997757	0.00028565	0.00510389	rs1809419
chr16:58576290-58576416	-1.82937	1.31489e-05	0.0018918	rs9936144
chr17:17997613-17997739	-0.342169	0.00147195	0.00988057	rs8071238
chr17:63882961-63883087	-2.47868	4.25116e-07	0.000414882	rs2727318
chr17:63899825-63899951	0.58016	2.06658e-06	0.000960857	rs2854160
chr17:67818203-67818329	-1.33405	2.31945e-05	0.00213102	rs3936134
chr17:67852815-67852941	0.677212	0.000624015	0.00662634	rs4791048
chr17:67884360-67884486	0.25323	0.00109567	0.00842713	rs115210018
chr17:68052500-68052626	-0.33647	0.000686642	0.00704026	rs34503060
chr17:68084035-68084161	0.429703	0.000121612	0.00371753	rs62084748
chr17:75313211-75313337	0.861521	0.000431534	0.00589035	rs55653371
chr17:75845558-75845684	0.346046	0.000117247	0.00371753	rs9900122
chr17:81514683-81514809	0.726617	0.000720039	0.00721988	rs10153315
chr19:10230115-10230241	1.03299	4.04406e-05	0.00235251	rs2033493
chr19:18993971-18994097	-0.385607	0.000981576	0.00814241	rs73006908
chr19:19307994-19308120	-0.583725	6.4489e-05	0.00292033	rs73001020
chr19:33415154-33415280	-1.21838	3.78374e-05	0.00235251	rs4805885
chr19:47076865-47076991	0.531193	0.00035194	0.0054909	rs11667244
chr19:48737695-48737821	-0.952109	6.07513e-06	0.00147626	rs427248
chr2:101047059-101047185	-0.282728	0.000474166	0.00596871	rs6543007
chr2:164775495-164775621	-0.486908	0.00118249	0.00881426	rs355871
chr2:169761635-169761761	0.500945	0.000355695	0.00550535	rs10803839
chr20:34482291-34482417	-0.910298	5.122e-07	0.000414882	rs6058059
chr20:40551119-40551245	-1.40595	0.000270984	0.00505154	rs1883711
chr21:29011143-29011269	0.606331	0.000624458	0.00662634	rs13048501
chr22:17954553-17954679	-1.96882	2.50327e-08	6.08295e-05	rs12158906
chr22:17963489-17963615	0.285451	0.000803863	0.00760073	rs1079576
chr22:17976829-17976955	-2.12473	4.35206e-05	0.00235251	rs9605461
chr22:17977030-17977156	-0.507828	0.000940525	0.00799117	rs9605462
chr22:17980779-17980905	-0.489943	0.00020234	0.00439005	rs8140977
chr22:24599671-24599797	-0.863838	6.60981e-05	0.00292033	rs112403677
chr22:24610886-24611012	0.507289	0.000423045	0.00584091	rs370160909
chr22:24631227-24631353	0.464702	0.000978878	0.00814241	rs11090329
chr22:24669154-24669280	-0.680789	0.000223536	0.00453399	rs131467
chr22:24669166-24669292	-0.899197	1.85217e-05	0.00213102	rs131468
chr22:38174842-38174968	-0.531817	0.000346185	0.00546377	rs133013
chr22:38175987-38176113	-0.365691	0.000999837	0.00818048	rs75387
chr22:43979799-43979925	0.983869	1.47918e-05	0.0018918	rs11090620
chr22:50424731-50424857	0.957925	0.000246239	0.0048255	rs10854887
chr3:12229818-12229944	-0.272398	0.000263579	0.00496509	rs56268840
chr3:149493662-149493788	0.568413	0.00131356	0.00934361	rs12633863
chr3:160610717-160610843	0.65238	0.000275976	0.00505154	rs4679903
chr4:145900195-145900321	0.973414	0.000123918	0.00371753	rs4835265
chr4:87252477-87252603	1.29253	4.03999e-05	0.00235251	rs7656630
chr5:133097542-133097668	-1.09512	0.000346264	0.00546377	rs62375243
chr5:56500186-56500312	0.947144	1.4433e-05	0.0018918	rs72754139
chr6:139518244-139518370	-0.681947	6.82737e-05	0.00296259	rs608662
chr6:139518760-139518886	0.558592	0.00142477	0.0097328	rs589235
chr6:158775055-158775181	0.18866	0.000136081	0.00376965	rs3123105
chr6:158780738-158780864	-0.618894	0.000431977	0.00589035	rs3123108
chr6:31395649-31395775	-0.354921	0.000298202	0.00521318	rs2523464
chr6:31793373-31793499	-2.62342	2.95122e-05	0.00234841	rs2607014
chr6:31978997-31979123	0.683831	0.000326669	0.00532756	rs386480
chr6:32467716-32467842	-0.270488	3.05278e-05	0.00234841	rs28895224
chr6:32485496-32485622	2.10882	0.000391118	0.0057254	rs34036879
chr6:32543144-32543270	0.921842	0.000333777	0.00540719	rs559903629
chr6:32604032-32604158	-0.821167	0.00053943	0.006302	rs9270894
chr6:32614810-32614936	-0.302127	0.00121816	0.00894302	rs3104413
chr6:32614832-32614958	-0.309098	0.000307195	0.00525947	rs9271331
chr6:32614838-32614964	0.406562	0.000152279	0.00393657	rs9271333
chr6:32622588-32622714	0.192878	0.000217267	0.00453399	rs9271563
chr6:32625990-32626116	0.760779	0.000123426	0.00371753	rs9271748
chr6:34269543-34269669	-0.595008	0.00090588	0.00783376	rs534912145
chr6:42956623-42956749	0.233736	0.00145321	0.00982384	rs4714640
chr7:135258242-135258368	-1.58077	0.000903061	0.00783376	rs11979450
chr7:28122992-28123118	-0.193459	0.000119634	0.00371753	rs12531540
chr7:6416397-6416523	-0.335838	0.000992531	0.00817576	rs13235365
chr7:6422271-6422397	-0.597507	0.00134166	0.00934361	rs12537483
chr8:125467057-125467183	-0.52699	0.000493925	0.00602137	rs6982502
chr8:144489659-144489785	-0.505855	3.60482e-05	0.00235251	rs72697645
chr8:19958045-19958171	0.715093	0.000157906	0.00400331	rs289
chr8:20003652-20003778	0.422767	0.000514759	0.00616403	rs4083261
chr8:71523206-71523332	-1.36321	4.84088e-05	0.00244869	rs71525127
chr9:133239726-133239852	0.548502	0.000135721	0.00376965	rs7470777
chr9:6665034-6665160	-2.23876	2.37249e-06	0.000960857	rs1658973
chr9:95499878-95500004	0.914477	0.000257888	0.00489585	rs60150206
chr6:34276292-34276418	-0.134773	0.00129811	0.00934361	rs115245297
chr1:62689615-62689741	-1.753	4.97316e-06	0.00134275	rs10889356
chr5:56508662-56508788	0.765698	3.71692e-05	0.00235251	rs40270
chr22:17963661-17963787	0.402996	0.000499865	0.00604314	rs1076543
chr15:78761712-78761838	0.333967	0.000104126	0.00371753	rs12898346
chr2:113816645-113816771	0.415563	0.0014831	0.00988057	rs13009468
chr2:164755031-164755157	0.472014	0.000699724	0.00711435	rs1828213
chr19:19348343-19348469	-0.161739	0.000220491	0.00453399	rs968525
chr5:133054828-133054954	-0.77423	0.000470987	0.00596093	rs62375202
chr20:34399797-34399923	-0.356597	0.00130199	0.00934361	rs7271970
chr6:32475611-32475737	-1.31219	0.000168625	0.00405702	rs9378264
chr3:29318398-29318524	-0.535404	0.00019296	0.00422497	rs57440162
chr17:75316040-75316166	-0.470019	0.000149093	0.00389565	rs8072449
chr12:20897000-20897126	-0.998884	0.00147929	0.00988057	rs2417886
chr3:37047951-37048077	0.376877	0.000896099	0.00783376	rs1194703990
chr2:226227371-226227497	0.89154	8.97474e-05	0.00346169	rs2972149
chr17:18046786-18046912	1.20979	0.000417452	0.00584091	rs12939020
chr3:36978396-36978522	-0.512204	4.49524e-05	0.00235251	rs7615360
chr6:42966699-42966825	-1.21275	3.1834e-05	0.00234841	rs2274514
chr2:113841359-113841485	-0.659444	0.000126446	0.00374712	rs12995205
chr7:73637664-73637790	-1.03902	0.000144458	0.00381559	rs799165
chr17:75368481-75368607	-0.572611	0.000277628	0.00505154	rs2385266
chr7:6437442-6437568	-0.884468	0.0012319	0.00901665	rs13221129
chr1:62440159-62440285	-0.426125	0.000952328	0.00806327	rs10493322
chr2:27525694-27525820	0.848241	0.000495005	0.00602137	rs1260333
chr6:32625996-32626122	0.671688	0.000406082	0.00584091	rs9271749
chr2:100982813-100982939	-0.841868	0.000340672	0.00544627	rs6543004
chr3:37183284-37183410	-0.73305	0.000588751	0.00643804	rs11711937
chr19:15877094-15877220	-1.32807	0.000220367	0.00453399	rs3093211
chr21:32426485-32426611	0.317626	0.000928161	0.00794166	rs7275247
chr2:226058622-226058748	-0.953605	3.96077e-05	0.00235251	rs7597168
chr15:78728632-78728758	0.973812	0.000178176	0.0041235	rs2869554
chr19:19584356-19584482	-0.750645	0.00119855	0.00885252	rs73004951
chr3:37217115-37217241	-0.785322	0.00089225	0.00783376	rs1399178
chr2:113818678-113818804	-0.227217	0.000256242	0.00489585	rs6739861
chr17:70443456-70443582	-0.590519	0.000367195	0.00564436	rs2159437
chr12:121168193-121168319	0.452628	0.000447998	0.00589035	rs2857590
chr8:20062081-20062207	-0.199529	0.000696714	0.00711351	rs4128744
chr14:24402657-24402783	0.553166	0.00137717	0.00950713	rs11621792
chr10:77877888-77878014	-0.234824	0.00142587	0.0097328	rs11818687
chr18:58464570-58464696	0.732439	0.00010753	0.00371753	rs4640266
chr19:19457787-19457913	-0.944107	0.000721988	0.00721988	rs4808203
chr18:58444298-58444424	-1.17393	0.000241824	0.00481665	rs7234602
chr22:28735737-28735863	-0.277459	0.000743244	0.0073183	rs4352308
chr5:157326213-157326339	1.49746	0.000443564	0.00589035	rs2289850
chr10:112990558-112990684	0.640829	0.000789656	0.00749556	rs61875119
chr19:19510132-19510258	0.567494	0.00098178	0.00814241	rs56273306
chr22:38177996-38178122	0.800144	0.000320127	0.00529189	rs133024
chr19:47081920-47082046	0.454812	0.000859558	0.00778079	rs6509311
chr6:31392832-31392958	-1.00299	0.0011027	0.00842713	rs3094591
chr16:53766779-53766905	-1.61403	9.52473e-05	0.00361642	rs9940128
chr1:62590378-62590504	-2.18631	0.000418429	0.00584091	rs1748197
chr21:39096849-39096975	-0.949192	0.000174777	0.00412337	rs4817988
chr10:100140046-100140172	-1.0818	0.00131751	0.00934361	rs12413812
chr6:32600599-32600725	3.65772	0.000129922	0.00375846	rs34331363
chr10:100038125-100038251	-0.350937	0.000411057	0.00584091	rs12415923
chr6:31387685-31387811	-1.37754	0.000856207	0.00778079	rs2596558
chr19:19290346-19290472	-0.847012	0.00086133	0.00778079	rs4808938
chr17:66194739-66194865	0.504529	0.00133598	0.00934361	rs9906486
chr8:20021130-20021256	0.441625	0.000769682	0.0074248	rs112994260
chr2:226059455-226059581	-0.385031	0.00121735	0.00894302	rs1522810
chr2:27493564-27493690	0.846024	0.00111142	0.00846633	rs704795
chr7:73573676-73573802	-0.777337	0.00106177	0.00837698	rs35659126
chr10:34746336-34746462	1.94311	0.000889637	0.00783376	rs11009914
chr19:19553205-19553331	-0.908671	0.000578143	0.00643202	rs17216588
chr3:37052051-37052177	0.621531	0.00109638	0.00842713	rs4678930
chr22:17983282-17983408	1.59887	0.000434431	0.00589035	rs5992946
chr10:100061863-100061989	-0.441815	0.000177258	0.0041235	rs7906181
chr10:112227727-112227853	0.490407	0.00106124	0.00837698	rs4573621
chr6:42973009-42973135	1.16081	0.000770506	0.0074248	rs9296406
chr12:52880926-52881052	0.394376	0.000457856	0.00594968	rs7302145
chr10:99922094-99922220	-1.45439	0.000381444	0.00567986	rs72840103
chr2:226058079-226058205	-0.386727	0.00100911	0.00822866	rs11895224
chr20:34334109-34334235	0.884317	0.000206819	0.00444753	rs551094207
chr2:232651761-232651887	-0.771222	0.00143528	0.00976958	rs201212687
chr19:19285744-19285870	-0.833006	0.00056397	0.00643202	rs188247550
chr6:32640821-32640947	0.990408	3.14935e-06	0.00109328	rs9272659
chr2:27466770-27466896	0.982971	0.00132732	0.00934361	rs1406295
chr2:226151483-226151609	-0.65295	0.00058497	0.00643202	rs4675056
chr16:58036997-58037123	0.518009	0.000447048	0.00589035	rs12928392
chr6:31382982-31383108	-0.937344	0.000164622	0.00404073	rs2596566
chr16:79713895-79714021	-0.348895	0.00041536	0.00584091	rs73575083
chr22:28719015-28719141	-0.228646	0.00130076	0.00934361	rs4822983
chr1:88770283-88770409	-0.40216	0.0001613	0.00400331	rs7541301
chr5:31021188-31021314	-0.989956	0.000338837	0.00544627	rs10075805
chr2:113083875-113084001	-0.875715	0.00105255	0.00837698	rs6722922
chr7:135257518-135257644	0.729538	0.000297361	0.00521318	rs67633646
chr10:99848910-99849036	-0.808049	1.01878e-05	0.0018918	rs111866537
chr6:32641814-32641940	0.843085	0.00109431	0.00842713	rs9272734
chr17:68065005-68065131	-0.652457	0.000136005	0.00376965	rs62084740
chr3:37103620-37103746	0.865728	3.6376e-05	0.00235251	rs4678937
chr10:113031668-113031794	-1.04423	0.0011622	0.00871652	rs12260037
chr6:32637238-32637364	0.470189	0.000422498	0.00584091	rs9272417
chr19:41319223-41319349	-0.489302	4.44148e-05	0.00235251	rs73045269
chr1:62490128-62490254	0.407236	0.000959165	0.00809295	rs1690761
chr6:32307781-32307907	-0.701924	0.000442528	0.00589035	rs9268178
chr10:100099385-100099511	-0.367767	0.000450866	0.00589035	rs9888058
chr7:87464868-87464994	-0.569575	0.000316502	0.00527665	rs10452935
chr8:125453000-125453126	-0.414984	0.00052659	0.00618171	rs17730649
chr2:111981842-111981968	0.963693	0.000765081	0.0074248	rs4848918
chr6:34260409-34260535	0.366313	0.000900189	0.00783376	rs151214526
chr6:32390361-32390487	-0.749803	0.000103827	0.00371753	rs3129950
chr9:95453286-95453412	0.669045	0.00110281	0.00842713	rs28583690
chr2:111995457-111995583	0.579986	0.000108557	0.00371753	rs6726639
chr12:52901547-52901673	1.01919	0.000891211	0.00783376	rs1799872
chr17:63685762-63685888	1.41398	2.89866e-05	0.00234841	rs3785574
chr3:142167863-142167989	-0.47319	0.000185991	0.00418481	rs143319532
chr19:15872716-15872842	-0.468817	0.000465593	0.0059558	rs62107768
chr1:23141256-23141382	0.429084	0.000637774	0.00670905	rs2867314
chr16:53786091-53786217	1.7397	8.55577e-05	0.00335331	rs11075992
chr19:19151428-19151554	0.520306	0.00104817	0.00837698	rs11672862
chr10:77856457-77856583	0.320602	0.000118114	0.00371753	rs1248694
chr6:31384237-31384363	0.686433	0.00107373	0.00841665	rs28752475
chr7:73591383-73591509	-0.510101	0.00112299	0.00852774	rs35866503
chr2:43842570-43842696	-1.05332	1.33826e-05	0.0018918	rs75331444
chr2:164706320-164706446	0.260919	0.00143955	0.00977126	rs13017482
chr3:37224571-37224697	1.10782	0.000468549	0.00596093	rs11926827
chr6:80712958-80713084	-1.31117	0.000136841	0.00376965	rs75940653
chr10:100130510-100130636	0.756825	0.000143206	0.00381559	rs1324692
chr9:95468562-95468688	-0.4506	5.68897e-05	0.00271063	rs28711421
chr8:102657700-102657826	0.690512	4.46336e-05	0.00235251	rs4734654
chr5:56564891-56565017	-0.315473	0.000223901	0.00453399	rs3936511
chr10:96700761-96700887	-0.193752	0.000726893	0.00723914	rs45587331
chr19:15870152-15870278	0.174696	0.000387861	0.00571214	rs7252638
chr6:31378004-31378130	-0.469066	0.000219698	0.00453399	rs2523632
chr1:155116256-155116382	-0.866245	0.000572905	0.00643202	rs10796939
chr1:88662547-88662673	-2.33696	0.00134411	0.00934361	rs7355064
chr10:100236466-100236592	-0.560697	0.00115562	0.00869401	rs7905395
chr2:102385075-102385201	-4.4795	0.00081116	0.0076105	rs3752659
chr7:130749707-130749833	0.373863	0.000400866	0.00583295	rs34282904
chr6:139513669-139513795	-0.136775	0.00145943	0.00982384	rs654689
chr20:46967676-46967802	0.733585	0.000644807	0.00672481	rs6063046
chr22:43966235-43966361	-0.297203	0.000838777	0.00772261	rs9626073
chr1:28262761-28262887	-0.44131	5.16067e-05	0.00250809	rs12127864
chr8:19996926-19997052	1.08065	0.00032358	0.00531284	rs4425772
chr6:32623757-32623883	-0.98016	3.1892e-05	0.00234841	rs9271609
chr11:119083421-119083547	-1.74878	4.55011e-05	0.00235251	rs7952700
chr2:164651816-164651942	-0.926373	0.000865542	0.00778988	rs10184004
chr15:78685959-78686085	-0.203033	0.000583612	0.00643202	rs4887077
chr4:87282613-87282739	2.18383	8.2153e-05	0.00327265	rs13150068
chr19:33486427-33486553	0.52969	4.93769e-05	0.00244869	rs10425678
chr17:18046624-18046750	0.267174	0.000937329	0.00799117	rs12940282
chr2:27385185-27385311	-1.34376	1.31427e-05	0.0018918	rs1647284
chr3:12587358-12587484	0.230294	7.78197e-05	0.00320512	rs2290159
chr2:226155874-226156000	0.631762	0.000602508	0.00653614	rs7578326
chr6:32524398-32524524	-0.870671	0.000495586	0.00602137	rs78098131
chr7:116777731-116777857	1.09137	2.4555e-05	0.00213102	rs11770163
chr6:42953043-42953169	-0.099459	0.000783875	0.00746986	rs4469287
chr10:100277164-100277290	-0.216838	0.000974036	0.00814241	rs2862956
chr20:34375057-34375183	0.285061	0.000118712	0.00371753	rs2378135
chr22:17964868-17964994	-0.391145	0.00118249	0.00881426	rs5992925
chr6:42956821-42956947	0.282544	0.000278562	0.00505154	rs4714641
chr12:122056840-122056966	0.761442	0.00017365	0.00412337	rs11835818
chr6:139513154-139513280	-2.56812	0.00054316	0.0063152	rs796804594
chr12:121179841-121179967	-2.14493	1.59289e-05	0.00193536	rs2686380
chr1:50649073-50649199	-1.03993	0.00104088	0.00837531	rs28699363
chr6:32625997-32626123	0.299483	0.000352502	0.0054909	rs9271750
chr5:56512585-56512711	0.136692	0.000989706	0.00817576	rs465002
chr19:19179565-19179691	0.244643	0.000998261	0.00818048	rs10854010
chr11:116712906-116713032	-0.635763	0.00060938	0.00655218	rs74849419
chr19:33392228-33392354	-0.646307	0.00101385	0.00823966	rs10775579
chr7:73631090-73631216	0.521461	0.00141535	0.00971556	rs7784668
chr16:53787887-53788013	0.547378	6.09971e-05	0.00285044	rs7201850
chr6:32531310-32531436	0.189585	0.00102346	0.00826832	rs75901433
chr11:65403066-65403192	0.997731	0.000904424	0.00783376	rs10128627
chr20:62374223-62374349	-0.272723	0.000191981	0.00422497	rs2427301
chr19:19411685-19411811	-0.750499	0.000317034	0.00527665	rs2965188
chr6:42952168-42952294	0.54873	0.000372438	0.00564436	rs2104616
chr1:11797916-11798042	0.367232	0.00109145	0.00842713	rs17037388
chr8:9323822-9323948	0.479899	0.000839	0.00772261	rs2169387
chr19:19388726-19388852	-0.291516	2.00947e-05	0.00213102	rs60321073
chr5:157295355-157295481	-0.278549	0.000669932	0.00692738	rs17054431
chr2:111997569-111997695	-0.452136	0.00115111	0.00868694	rs3811636
chr12:122116679-122116805	-0.312856	0.00104458	0.00837698	rs28737311
chr6:32631463-32631589	-0.858056	0.000462898	0.0059558	rs9272063
chr1:11142291-11142417	-0.637577	0.000570914	0.00643202	rs12239187
chr17:66142603-66142729	-0.812154	0.00118941	0.00883874	rs76375367
chr1:2235307-2235433	0.93028	0.00133091	0.00934361	rs76875252
chr1:16195440-16195566	1.43357	0.00046568	0.0059558	rs6603891
chr7:116759014-116759140	-0.289585	0.000256532	0.00489585	rs10215153
chr22:43951490-43951616	-0.891013	0.000449931	0.00589035	rs9614293
chr5:56565896-56566022	-0.341129	0.000836288	0.00772261	rs9686661
chr19:19303075-19303201	0.397309	0.00105585	0.00837698	rs2301786
chr19:17749176-17749302	0.273362	0.0013273	0.00934361	rs12986046
chr2:226124549-226124675	0.70618	0.00134307	0.00934361	rs1403356
chr1:16203266-16203392	-0.553124	0.000114332	0.00371753	rs221043
chr6:32621465-32621591	1.11112	0.000760532	0.0074248	rs9271502
chr6:21926698-21926824	0.838419	0.00138969	0.00956639	rs28431967
chr11:116930164-116930290	0.665289	0.000297717	0.00521318	rs10790167
chr17:68099702-68099828	1.3904	0.000309508	0.00525947	rs62084755
chr16:56615009-56615135	-0.67557	0.000180951	0.00414821	rs113599059
chr8:71557007-71557133	-0.777551	0.00108793	0.00842713	rs12675900
chr6:32626312-32626438	0.547637	0.00113851	0.00861864	rs4645458
chr1:11825527-11825653	0.745574	0.000372497	0.00564436	rs56153133
chr12:122132149-122132275	-0.24848	0.000144342	0.00381559	rs7955571
chr16:58568789-58568915	-0.770876	0.000561844	0.00643202	rs72790266
chr3:37068079-37068205	-0.937159	0.000685468	0.00704026	rs56180213
chr3:12363434-12363560	-1.18678	0.00109586	0.00842713	rs113843561
chr2:111991871-111991997	-0.284927	0.000584838	0.00643202	rs7571009
chr1:16102200-16102326	-0.777141	0.000119184	0.00371753	rs61769924
chr6:32633920-32634046	0.904905	0.000275425	0.00505154	rs9272190
chr2:111926731-111926857	0.640503	0.000373968	0.00564436	rs4468823
chr1:88896021-88896147	1.61636	0.00119499	0.00885252	rs10922504
chr6:80676755-80676881	-0.812244	0.000743877	0.0073183	rs80189833
chr3:37080059-37080185	-1.3739	0.00133167	0.00934361	rs9814918
chr6:35317058-35317184	1.07688	0.00044426	0.00589035	rs201125744
chr2:43846454-43846580	-0.503192	0.000714768	0.00721988	rs41360247
chr2:112015154-112015280	0.891621	0.000584237	0.00643202	rs4525705
chr10:100285639-100285765	0.804668	0.00056864	0.00643202	rs61871345
chr10:112987455-112987581	-1.06251	0.000768457	0.0074248	rs4073288
chr17:75841875-75842001	-0.250711	0.00134579	0.00934361	rs9894291
chr17:67934758-67934884	-1.21606	0.00137651	0.00950713	rs4791299
chr7:73615782-73615908	-0.934874	0.000483883	0.00596871	rs13229619
chr8:54536658-54536784	-0.470024	0.00131538	0.00934361	rs28571765
chr6:32593819-32593945	-0.307337	0.000651716	0.00676782	rs28366325
chr12:52878580-52878706	0.392908	0.000516012	0.00616403	rs1941030142
chr16:53786838-53786964	0.335232	0.000847416	0.00777065	rs9937709
chr6:158801449-158801575	0.727244	4.10695e-05	0.00235251	rs3127188
chr10:99854313-99854439	0.963643	0.000255673	0.00489585	rs113741841
chr10:112225608-112225734	0.555556	0.000891493	0.00783376	rs55645497
chr10:77900113-77900239	-0.485751	8.12844e-05	0.00327265	rs61855849
chr1:62455688-62455814	-1.58284	0.000739865	0.0073183	rs634341
chr2:101020484-101020610	1.08447	0.000922937	0.00792486	rs17663443
chr3:37159564-37159690	0.383691	0.000114588	0.00371753	rs2175881
chr6:32607056-32607182	-0.289559	0.00145848	0.00982384	rs7770010
chr17:75838460-75838586	0.325546	0.000166935	0.00405653	rs7217432
chr22:50424642-50424768	-0.258274	0.000631552	0.00667249	rs11091016
chr11:117025376-117025502	-1.26289	0.000644189	0.00672481	rs10892063
chr10:77785533-77785659	1.77468	0.000283605	0.00510389	rs2812436
chr6:32440657-32440783	0.605813	0.00107075	0.00841665	rs3135394
chr9:6672947-6673073	0.817683	0.000216094	0.00453399	rs1003178091
chr6:32538181-32538307	-1.07418	0.000719229	0.00721988	rs548623104
chr21:29033963-29034089	-0.806165	0.00010656	0.00371753	rs7280960
chr3:160514389-160514515	-0.996004	0.000314147	0.00527665	rs73875290
chr17:70484638-70484764	-0.433709	2.12627e-05	0.00213102	rs4793265
chr6:32623726-32623852	0.487942	0.000483448	0.00596871	rs9271607
chr20:40602403-40602529	1.33933	0.00127668	0.00928842	rs6124255
chr6:32631512-32631638	0.910019	0.00148412	0.00988057	rs9272065
chr11:117029003-117029129	-0.598523	0.000549765	0.00636157	rs7926104
chr3:37032814-37032940	-0.452555	0.000590816	0.00643804	rs3821826
chr6:80616530-80616656	-1.02029	0.000383332	0.00567986	rs112104284
chr10:112141816-112141942	-0.713233	0.00124643	0.00909556	rs58175211
chr6:21939629-21939755	-0.173641	0.000110105	0.00371753	rs72657622
chr10:99855195-99855321	0.479686	0.00102418	0.00826832	rs11816708
chr7:130739148-130739274	1.08023	0.000621542	0.00662634	rs6973807
chr3:142946070-142946196	-1.907	3.6714e-05	0.00235251	rs12330903
chr16:58589311-58589437	0.471514	0.00129201	0.00934361	rs113571835
chr15:78674250-78674376	0.363891	0.000517474	0.00616403	rs11639372
chr1:88913141-88913267	-0.435693	0.000822397	0.00768625	rs9787246
chr19:19308199-19308325	-0.537568	7.48787e-05	0.0031922	rs739846
chr9:109385971-109386097	-0.575631	0.000307913	0.00525947	rs3793569
chr6:32637176-32637302	0.637813	0.000483325	0.00596871	rs9272415
chr6:32605722-32605848	0.105735	0.000581613	0.00643202	rs602457
chr6:158815289-158815415	0.413378	0.000807779	0.00760815	rs3102967
chr7:73493066-73493192	-0.846438	0.000233984	0.00469901	rs111837003
chr3:113284163-113284289	-0.880025	0.000159681	0.00400331	rs9864630
chr22:43963786-43963912	0.360558	0.000896705	0.00783376	rs12170274
chr6:31973057-31973183	0.577433	0.000379387	0.00567986	rs389884
chr6:32589423-32589549	0.803699	0.000128043	0.00374873	rs28366213
chr6:32556044-32556170	0.251993	0.000963362	0.00810024	rs71536538
chr19:19554709-19554835	0.330815	0.000522734	0.00618171	rs34755166
chr4:99527002-99527128	0.811433	0.000192992	0.00422497	rs7665143
chr3:113278833-113278959	0.649806	0.000773706	0.0074248	rs9853439
chr6:31439918-31440044	-0.684643	0.000829022	0.00771848	rs2844520
