# Supplementary material for: Integrative functional genomics reveals transcriptional regulatory function of risk alleles for metabolic liver disease
Source: Research Square preprint supplement (doi:10.21203/rs.3.rs-6984670/v1), 2025-10-23
Supplement: Supplementary file 6 [file 480c242b324269e5b55c5bbc.xlsx]

## Sheet: HepG2_PAOA_DAVs
Table S4. DAVs identified in HepG2 treated with PAOA.
coordination	log2(Fold change)	pValue	FDR	rsid
chr1:16101748-16101874	-0.594503	0.000268375	0.00449856	rs79596669
chr1:16102770-16102896	0.234308	0.000410655	0.00543749	rs28791627
chr1:16206547-16206673	-0.347535	0.000517079	0.00593032	rs221054
chr1:16293602-16293728	0.553885	0.00114483	0.0088808	rs2994142
chr1:2267555-2267681	0.44518	0.00108102	0.00863732	rs11588312
chr1:23172845-23172971	-1.59289	0.000414322	0.00543749	rs116399264
chr1:28263745-28263871	-1.1404	0.000194708	0.00377991	rs502273
chr1:28287896-28288022	1.1991	0.0002859	0.00459934	rs61551936
chr1:50424899-50425025	-0.562886	0.000689634	0.00685914	rs1278529
chr1:62440159-62440285	-0.42414	0.0013117	0.00962864	rs10493322
chr1:62458129-62458255	-0.591281	0.000312988	0.0047483	rs12037659
chr1:62590378-62590504	-2.36079	0.000880279	0.00787324	rs1748197
chr1:62689615-62689741	-1.78264	0.000100872	0.00300025	rs10889356
chr1:88653952-88654078	-1.85672	5.66415e-07	0.00053209	rs7530690
chr1:93304752-93304878	-0.579376	0.000303911	0.00468671	rs11164897
chr10:100037127-100037253	-0.730723	0.000123399	0.00321508	rs11190375
chr10:100095603-100095729	0.844069	3.28082e-05	0.0019278	rs4375373
chr10:100104353-100104479	-0.362421	0.000638177	0.00651596	rs2862948
chr10:100111928-100112054	-0.399512	0.0011008	0.00867966	rs12783521
chr10:100223996-100224122	0.141993	0.000344128	0.00499923	rs34027394
chr10:100236466-100236592	-0.557418	0.000171607	0.00367917	rs7905395
chr10:113026117-113026243	1.2668	0.000121845	0.00320947	rs4128598
chr10:34790883-34791009	0.302098	5.68964e-05	0.00241597	rs10764006
chr10:79145213-79145339	-0.543294	8.59339e-05	0.00281322	rs780156
chr10:88028818-88028944	0.288452	0.0003012	0.00468671	rs7908382
chr10:99833930-99834056	0.436433	0.00058729	0.00641276	rs56050010
chr10:99844661-99844787	0.28648	0.000638479	0.00651596	rs72838129
chr10:99848910-99849036	-0.853955	0.000958629	0.00810691	rs111866537
chr11:116725530-116725656	-1.09511	0.000195774	0.00377991	rs61905078
chr11:116859959-116860085	-0.405366	1.57167e-05	0.00163345	rs567312
chr11:117033578-117033704	-0.997991	1.83993e-05	0.00163345	rs4575311
chr11:119057479-119057605	0.336967	3.81822e-05	0.00212844	rs2509121
chr11:47377988-47378114	-0.196703	0.000118855	0.00316552	rs2278890
chr11:61781490-61781616	-0.311213	0.000427692	0.00543749	rs174533
chr12:121179841-121179967	-2.02348	3.25124e-06	0.00111332	rs2686380
chr12:122114432-122114558	0.542088	2.64048e-05	0.00186154	rs28639626
chr12:122124026-122124152	0.550895	2.50021e-05	0.00186154	rs11057654
chr12:123266138-123266264	0.194832	0.00109458	0.00867966	rs4553407
chr12:26319566-26319692	-1.11564	0.000180016	0.00372351	rs7132434
chr12:52867827-52867953	-0.153674	0.000337192	0.00494	rs10783544
chr12:52872846-52872972	-0.2145	0.000670383	0.00672347	rs11829175
chr14:24402657-24402783	0.550432	0.000937406	0.0080826	rs11621792
chr15:66569660-66569786	-0.185146	0.0008728	0.00783559	rs57117342
chr15:78728632-78728758	0.891451	2.94382e-05	0.0019278	rs2869554
chr15:78761409-78761535	-1.06808	0.000280262	0.00457826	rs1809419
chr15:78761712-78761838	0.345147	0.000160395	0.00366159	rs12898346
chr16:53766779-53766905	-1.51681	1.77899e-05	0.00163345	rs9940128
chr16:58042455-58042581	-0.460302	0.000453353	0.00546074	rs2118018
chr16:58576290-58576416	-1.73348	0.000352291	0.00503716	rs9936144
chr17:17997613-17997739	-0.377983	0.000170223	0.00367917	rs8071238
chr17:18046786-18046912	1.14717	0.000495769	0.00574086	rs12939020
chr17:2074977-2075103	0.616232	0.000150727	0.00349986	rs8078625
chr17:63882961-63883087	-2.29685	1.21226e-05	0.00161433	rs2727318
chr17:63899825-63899951	0.658651	0.000184569	0.00377991	rs2854160
chr17:67818203-67818329	-1.22142	1.16994e-05	0.00161433	rs3936134
chr17:67851146-67851272	1.34528	4.39802e-05	0.00234268	rs7212293
chr17:67852815-67852941	0.645567	0.00037329	0.00511301	rs4791048
chr17:68065005-68065131	-0.668486	4.71617e-05	0.00240525	rs62084740
chr17:68084035-68084161	0.410562	0.0012011	0.00908217	rs62084748
chr17:75313211-75313337	0.847457	3.18108e-05	0.0019278	rs55653371
chr17:75845141-75845267	-0.25898	0.000404276	0.00543749	rs2410859
chr17:75845558-75845684	0.490211	0.000656273	0.00660961	rs9900122
chr17:81514683-81514809	0.740905	2.04093e-05	0.00168694	rs10153315
chr19:15870152-15870278	0.096342	0.00106738	0.00855689	rs7252638
chr19:19044800-19044926	-0.488998	0.00136857	0.00976331	rs73008942
chr19:19172832-19172958	0.397243	0.000195971	0.00377991	rs60636572
chr19:19285744-19285870	-0.872001	3.20409e-05	0.0019278	rs188247550
chr19:19307994-19308120	-0.548437	1.82131e-05	0.00163345	rs73001020
chr19:19348928-19349054	-0.406272	0.000827652	0.00765977	rs12982276
chr19:19457787-19457913	-0.964352	0.000372803	0.00511301	rs4808203
chr19:33415154-33415280	-1.1871	6.4883e-05	0.00251944	rs4805885
chr19:33503448-33503574	0.559932	0.000112151	0.00310078	rs3786920
chr19:44891649-44891775	0.557365	0.000704113	0.00694551	rs184017
chr19:47076865-47076991	0.610932	0.000867666	0.00783419	rs11667244
chr19:47081379-47081505	-0.198913	0.000438201	0.00543749	rs3745619
chr19:48737695-48737821	-0.966519	5.45022e-06	0.00130642	rs427248
chr2:101047059-101047185	-0.324371	0.000363549	0.00503716	rs6543007
chr2:102385075-102385201	-4.9633	5.08024e-05	0.00241597	rs3752659
chr2:113816645-113816771	0.420901	0.00102039	0.00837628	rs13009468
chr2:113818678-113818804	-0.316855	8.35344e-06	0.00143023	rs6739861
chr2:113841359-113841485	-0.619902	2.62685e-05	0.00186154	rs12995205
chr2:164775495-164775621	-0.520852	0.00140656	0.00997493	rs355871
chr2:169761635-169761761	0.568441	0.000473101	0.00558632	rs10803839
chr2:226058622-226058748	-1.03266	0.000128601	0.00325989	rs7597168
chr2:226059430-226059556	-0.360648	0.000624627	0.00649113	rs62189028
chr2:226059455-226059581	-0.42108	0.0002032	0.00383519	rs1522810
chr2:232655481-232655607	1.08273	0.000130955	0.00326978	rs13395911
chr2:27525694-27525820	0.834005	0.000101385	0.00300025	rs1260333
chr20:34482291-34482417	-0.887187	8.87927e-07	0.00053209	rs6058059
chr20:40551119-40551245	-1.36703	0.000176344	0.00371014	rs1883711
chr21:29011143-29011269	0.595513	0.000449155	0.00543749	rs13048501
chr22:17954553-17954679	-1.89022	4.08845e-05	0.00222728	rs12158906
chr22:17976829-17976955	-2.20411	1.90616e-07	0.000456907	rs9605461
chr22:17977030-17977156	-0.374528	0.000423697	0.00543749	rs9605462
chr22:17980779-17980905	-0.477968	0.000337989	0.00494	rs8140977
chr22:24599633-24599759	0.497089	0.000291708	0.0046409	rs2003757
chr22:24599671-24599797	-1.00322	1.91864e-05	0.00164249	rs112403677
chr22:24620707-24620833	-0.229214	0.000707803	0.0069533	rs5760505
chr22:24669154-24669280	-0.618401	0.000401049	0.00543115	rs131467
chr22:24669166-24669292	-1.09069	1.75567e-05	0.00163345	rs131468
chr22:28719015-28719141	-0.199497	0.000795329	0.0075452	rs4822983
chr22:28735737-28735863	-0.270731	0.00137406	0.00977334	rs4352308
chr22:38172936-38173062	0.284463	9.02399e-05	0.00284612	rs738322
chr22:38174842-38174968	-0.531074	0.000239421	0.004189	rs133013
chr22:38177996-38178122	0.835587	0.00013591	0.00334663	rs133024
chr22:43979799-43979925	1.12896	0.000272913	0.00454287	rs11090620
chr3:142931386-142931512	-1.13745	0.000757985	0.00735583	rs9838306
chr3:155849537-155849663	-0.347732	0.0012765	0.00947856	rs7616842
chr3:160610717-160610843	0.696309	7.62751e-05	0.00276089	rs4679903
chr3:36978396-36978522	-0.434718	0.000146004	0.00349971	rs7615360
chr3:37217115-37217241	-0.746145	0.000432947	0.00543749	rs1399178
chr4:145900195-145900321	1.15266	1.60388e-05	0.00163345	rs4835265
chr4:87252477-87252603	1.22905	1.07276e-05	0.00161433	rs7656630
chr5:133097542-133097668	-1.0897	0.000885064	0.00788661	rs62375243
chr5:157326213-157326339	1.65957	2.49879e-05	0.00186154	rs2289850
chr5:56500186-56500312	0.911166	1.19368e-05	0.00161433	rs72754139
chr5:56508662-56508788	0.735335	0.000361109	0.00503716	rs40270
chr5:56564891-56565017	-0.36115	0.000112279	0.00310078	rs3936511
chr6:139518760-139518886	0.622812	9.68137e-05	0.00297516	rs589235
chr6:158780738-158780864	-0.521682	0.000197117	0.00377991	rs3123108
chr6:160347765-160347891	0.697602	0.000225515	0.00409515	rs551032
chr6:160349217-160349343	0.790731	8.68496e-05	0.00281322	rs474513
chr6:31387685-31387811	-1.34009	1.28979e-05	0.00162717	rs2596558
chr6:31793373-31793499	-2.6869	3.77817e-05	0.00212844	rs2607014
chr6:31978997-31979123	0.705818	0.000433467	0.00543749	rs386480
chr6:32484062-32484188	-0.357749	0.00132763	0.00970221	rs71565333
chr6:32485496-32485622	2.04396	1.61755e-05	0.00163345	rs34036879
chr6:32543144-32543270	0.987814	0.000176452	0.00371014	rs559903629
chr6:32600599-32600725	4.11361	6.54277e-05	0.00251944	rs34331363
chr6:32604032-32604158	-1.10978	0.000438057	0.00543749	rs9270894
chr6:32614832-32614958	-0.326511	5.14958e-05	0.00241597	rs9271331
chr6:32614838-32614964	0.366657	1.85254e-06	0.000888106	rs9271333
chr6:32625946-32626072	-0.246164	0.000136825	0.00334663	rs9271745
chr6:32625990-32626116	0.68247	0.000448981	0.00543749	rs9271748
chr6:32637238-32637364	0.517739	0.000112544	0.00310078	rs9272417
chr6:32637251-32637377	0.531657	5.74511e-05	0.00241597	rs9272418
chr6:34223691-34223817	0.268003	3.29745e-05	0.0019278	rs116836493
chr6:34269543-34269669	-0.589499	0.00058217	0.00641276	rs534912145
chr6:34276292-34276418	-0.16038	0.000607669	0.00644506	rs115245297
chr6:42952168-42952294	0.392752	0.00044144	0.00543749	rs2104616
chr6:42956623-42956749	0.244554	0.00103907	0.00841304	rs4714640
chr6:42966699-42966825	-1.32367	0.000111817	0.00310078	rs2274514
chr6:80624266-80624392	-0.587014	0.000417482	0.00543749	rs116452316
chr7:28110126-28110252	0.346106	0.000306973	0.00468671	rs11767776
chr7:28122992-28123118	-0.15667	0.00104109	0.00841304	rs12531540
chr7:6416397-6416523	-0.297004	0.000142292	0.0034452	rs13235365
chr7:6422220-6422346	-0.591708	6.62181e-05	0.00251944	rs12532493
chr7:6422271-6422397	-0.714896	0.00101562	0.00836582	rs12537483
chr7:6437442-6437568	-0.83524	0.000211335	0.00392689	rs13221129
chr8:102676090-102676216	-0.334314	0.000487653	0.00567429	rs10106298
chr8:125467057-125467183	-0.476882	0.00119244	0.00905973	rs6982502
chr8:144489659-144489785	-0.514602	8.211e-07	0.00053209	rs72697645
chr8:19958045-19958171	0.728377	0.000149719	0.00349986	rs289
chr8:71523206-71523332	-1.36721	4.02234e-06	0.00120519	rs71525127
chr9:133239726-133239852	0.766713	8.13868e-05	0.00278692	rs7470777
chr9:6664645-6664771	0.25201	7.84473e-05	0.00276089	rs1755618
chr9:6665034-6665160	-2.45478	4.8703e-06	0.00129712	rs1658973
chr9:95499878-95500004	1.04628	7.78237e-05	0.00276089	rs60150206
chr9:95510960-95511086	-0.426254	0.000127466	0.00325989	rs145965565
chr10:34746336-34746462	2.32971	0.000594376	0.00641276	rs11009914
chr19:44917934-44918060	-0.57197	0.0003234	0.00485442	rs12721046
chr7:135258242-135258368	-1.535	0.000355225	0.00503716	rs11979450
chr2:226227371-226227497	1.00213	0.000235783	0.00415568	rs2972149
chr8:19991698-19991824	0.702897	0.00111427	0.00873594	rs17410996
chr18:58444298-58444424	-1.20488	6.42228e-06	0.00137453	rs7234602
chr15:78760879-78761005	0.623463	0.000952931	0.00810691	rs4887096
chr18:58464570-58464696	0.756685	5.01945e-05	0.00241597	rs4640266
chr2:100982813-100982939	-1.02167	6.44427e-05	0.00251944	rs6543004
chr5:31021188-31021314	-1.02435	5.73588e-05	0.00241597	rs10075805
chr6:32623757-32623883	-0.860081	0.000165017	0.00367917	rs9271609
chr16:53782300-53782426	-1.69806	2.59006e-05	0.00186154	rs8050136
chr19:19365648-19365774	-0.563255	0.00118781	0.00905973	rs4808196
chr12:52901547-52901673	0.952566	0.00127725	0.00947856	rs1799872
chr2:232651761-232651887	-0.790957	7.67002e-05	0.00276089	rs201212687
chr6:31392832-31392958	-1.17395	0.00108493	0.00863983	rs3094591
chr2:113083875-113084001	-1.02251	0.000164561	0.00367917	rs6722922
chr12:20897000-20897126	-0.938379	0.000284794	0.00459934	rs2417886
chr19:19510132-19510258	0.65903	0.000443611	0.00543749	rs56273306
chr19:10230115-10230241	0.952961	0.000264666	0.00449416	rs2033493
chr7:73631090-73631216	0.609504	0.000329748	0.00487905	rs7784668
chr1:155116256-155116382	-0.977158	0.000266237	0.00449416	rs10796939
chr7:73573676-73573802	-0.647002	7.26759e-06	0.00137453	rs35659126
chr6:42956821-42956947	0.279015	1.47679e-05	0.00163345	rs4714641
chr7:87464868-87464994	-0.670516	0.000327991	0.00487905	rs10452935
chr22:17963661-17963787	0.327089	0.00131354	0.00962864	rs1076543
chr19:15877094-15877220	-1.31175	0.000948532	0.00810691	rs3093211
chr2:164706320-164706446	0.222084	0.000193116	0.00377991	rs13017482
chr1:11797916-11798042	0.461003	8.82046e-05	0.00281902	rs17037388
chr10:100140046-100140172	-1.14919	5.71765e-05	0.00241597	rs12413812
chr6:42973009-42973135	1.24358	7.9475e-05	0.00276089	rs9296406
chr7:116777731-116777857	1.10092	9.90031e-05	0.00300025	rs11770163
chr10:77781148-77781274	-0.548873	0.00100149	0.00830607	rs10824573
chr10:100145801-100145927	0.62906	0.000576055	0.00641276	rs4919426
chr19:19553205-19553331	-0.993416	0.00097112	0.00813907	rs17216588
chr20:34437303-34437429	-0.342679	0.000356373	0.00503716	rs6120645
chr6:31383293-31383419	-1.02147	0.000445393	0.00543749	rs2244490
chr21:39096849-39096975	-1.07066	0.000195475	0.00377991	rs4817988
chr6:31382982-31383108	-1.18051	0.00054085	0.00614416	rs2596566
chr12:123254068-123254194	0.440202	0.000924242	0.0080826	rs1568427
chr22:17983282-17983408	1.6553	0.000324033	0.00485442	rs5992946
chr2:43842570-43842696	-1.06962	3.02295e-05	0.0019278	rs75331444
chr11:117010019-117010145	0.151647	0.00106349	0.00855429	rs7127881
chr1:219540325-219540451	-0.626038	0.000247621	0.00430108	rs10779358
chr7:116885384-116885510	-0.342568	0.000129199	0.00325989	rs7800249
chr22:50424731-50424857	0.761915	0.00084588	0.00773883	rs10854887
chr2:111995457-111995583	0.557548	0.00085204	0.00776555	rs6726639
chr22:17979198-17979324	0.393823	0.000504411	0.00581285	rs34364976
chr6:31373758-31373884	1.60663	7.16239e-05	0.00268254	rs2853980
chr6:31384237-31384363	0.680556	0.000678289	0.00677441	rs28752475
chr6:32390361-32390487	-0.888637	0.000231228	0.00413622	rs3129950
chr19:19606184-19606310	-0.850947	0.00130993	0.00962864	rs73004967
chr2:164651816-164651942	-0.892317	0.00133481	0.00972504	rs10184004
chr8:20021130-20021256	0.394969	0.00136321	0.00976331	rs112994260
chr2:27385185-27385311	-1.37406	0.00011824	0.00316552	rs1647284
chr15:78683450-78683576	-0.495624	0.000216522	0.00399233	rs72743199
chr10:100130510-100130636	0.555591	0.000458909	0.00550002	rs1324692
chr17:63810138-63810264	0.547188	0.000169383	0.00367917	rs2584630
chr14:103103732-103103858	0.664711	0.00103657	0.00841304	rs151184170
chr3:37052051-37052177	0.644149	0.000831193	0.00766296	rs4678930
chr10:100038125-100038251	-0.505668	0.00136522	0.00976331	rs12415923
chr22:17980437-17980563	-0.825271	0.000807825	0.00759355	rs9605473
chr10:112227727-112227853	0.52229	0.000779657	0.00744557	rs4573621
chr6:32479082-32479208	0.527184	0.000996864	0.00829681	rs17203619
chr1:62436073-62436199	-0.616078	0.000595185	0.00641276	rs631106
chr3:37103620-37103746	0.968946	0.00018988	0.00377991	rs4678937
chr22:24608578-24608704	0.58194	0.00089324	0.00790073	rs4822516
chr12:122056840-122056966	0.658359	0.00104242	0.00841304	rs11835818
chr22:28569997-28570123	0.331117	0.000960518	0.00810691	rs34593692
chr1:16203266-16203392	-0.710081	0.00015185	0.00349986	rs221043
chr16:53786091-53786217	1.34502	0.000303168	0.00468671	rs11075992
chr10:99848081-99848207	-0.647286	0.000105099	0.00307222	rs72838138
chr3:12348922-12349048	0.776008	0.000568262	0.00636507	rs17036328
chr7:73591383-73591509	-0.602977	0.000996228	0.00829681	rs35866503
chr1:16102148-16102274	0.308759	0.000772829	0.00744557	rs78157057
chr12:123332966-123333092	-0.77838	4.68747e-05	0.00240525	rs11611680
chr2:111981842-111981968	0.926517	0.000396951	0.0054062	rs4848918
chr4:87293073-87293199	-0.840011	0.000815739	0.00763349	rs4546210
chr1:88896021-88896147	1.7269	5.70074e-05	0.00241597	rs10922504
chr8:19996926-19997052	1.19856	2.76632e-06	0.00110515	rs4425772
chr2:226099183-226099309	0.399747	0.000869376	0.00783419	rs13430421
chr6:32307781-32307907	-0.547426	0.000486483	0.00567429	rs9268178
chr17:67934758-67934884	-1.40139	0.000464287	0.00550939	rs4791299
chr6:32545535-32545661	-0.13763	0.00115644	0.00894187	rs74950807
chr2:27466770-27466896	0.976057	0.000150412	0.00349986	rs1406295
chr6:32524398-32524524	-0.931019	0.000564989	0.00635811	rs78098131
chr8:19958797-19958923	0.63269	0.00126666	0.00947856	rs297
chr6:32640821-32640947	1.01418	0.000621287	0.00649113	rs9272659
chr6:80712958-80713084	-1.5299	6.04538e-05	0.00249841	rs75940653
chr2:226155874-226156000	0.666348	9.24577e-05	0.0028782	rs7578326
chr11:116930164-116930290	0.678444	0.000582056	0.00641276	rs10790167
chr17:68054732-68054858	-0.544857	0.000733997	0.007152	rs62084711
chr20:34375057-34375183	0.284853	0.00116462	0.00897619	rs2378135
chr16:53787887-53788013	0.516069	0.00112252	0.00873594	rs7201850
chr4:99580470-99580596	1.10404	0.000169137	0.00367917	rs6841211
chr5:133048934-133049060	1.46671	0.00136735	0.00976331	rs4574536
chr12:123262351-123262477	-0.419489	0.000642525	0.00651596	rs10773002
chr2:226151483-226151609	-0.659934	5.35424e-05	0.00241597	rs4675056
chr2:27388539-27388665	0.869744	0.000292355	0.0046409	rs7594812
chr2:27448327-27448453	1.01675	0.00046151	0.00550367	rs7580759
chr1:28262761-28262887	-0.443846	0.000599273	0.00641276	rs12127864
chr10:113034897-113035023	-0.32871	0.000443592	0.00543749	rs7919152
chr10:102438708-102438834	-0.503253	0.000897837	0.00791219	rs117793008
chr6:32631974-32632100	-0.536437	0.00129139	0.00955388	rs9272100
chr1:2235307-2235433	1.26195	0.000796385	0.0075452	rs76875252
chr11:94083466-94083592	-1.71014	0.000442807	0.00543749	rs72968738
chr12:121182900-121183026	1.04098	0.0001146	0.00312155	rs2915641
chr9:6669999-6670125	-0.279978	0.000230994	0.00413622	rs820506
chr12:122123545-122123671	-0.698787	0.000714351	0.00698898	rs11608788
chr6:32631463-32631589	-0.931031	0.0011847	0.00905973	rs9272063
chr6:32634002-32634128	0.400035	0.000821935	0.00763635	rs9272198
chr19:19411685-19411811	-0.660095	0.000419876	0.00543749	rs2965188
chr17:75838460-75838586	0.401629	8.54117e-05	0.00281322	rs7217432
chr11:65403066-65403192	0.887771	0.000280769	0.00457826	rs10128627
chr2:226124549-226124675	0.65391	0.000774123	0.00744557	rs1403356
chr15:78734032-78734158	-0.782819	0.000361939	0.00503716	rs2869565
chr6:21926698-21926824	0.968908	0.000279273	0.00457826	rs28431967
chr6:31384709-31384835	0.437091	0.000613232	0.00647541	rs28366092
chr2:111997569-111997695	-0.483008	0.000970579	0.00813907	rs3811636
chr8:54536658-54536784	-0.373419	0.00017191	0.00367917	rs28571765
chr22:24589711-24589837	-0.480199	0.00135584	0.00976331	rs200426740
chr22:17967780-17967906	-0.224045	0.0010983	0.00867966	rs11704636
chr1:16144442-16144568	0.415407	0.000934559	0.0080826	rs12406250
chr1:16199408-16199534	0.487275	0.000625553	0.00649113	rs221034
chr10:112987455-112987581	-0.938332	0.000642365	0.00651596	rs4073288
chr6:32623726-32623852	0.53483	0.000587177	0.00641276	rs9271607
chr6:32538181-32538307	-1.13071	0.000478717	0.00562493	rs548623104
chr1:16191954-16192080	0.404554	0.00121734	0.00917584	rs6702866
chr6:32605425-32605551	-0.381453	0.000410072	0.00543749	rs601148
chr1:16195440-16195566	1.51484	0.000362826	0.00503716	rs6603891
chr13:27864994-27865120	1.37113	0.00062461	0.00649113	rs4769576
chr8:10713918-10714044	0.492641	7.45471e-06	0.00137453	rs4484649
chr11:116729785-116729911	0.615501	0.000225258	0.00409515	rs61905081
chr6:80765799-80765925	-0.576074	0.00111601	0.00873594	rs77510078
chr10:100285639-100285765	0.827624	0.00135167	0.00976331	rs61871345
chr11:57832750-57832876	-1.68117	0.000295195	0.00465515	rs12807250
chr6:158801449-158801575	0.892099	0.000112226	0.00310078	rs3127188
chr11:116756318-116756444	0.453715	0.000180195	0.00372351	rs56224630
chr19:19376430-19376556	0.887615	0.000233517	0.00414622	rs34277109
chr22:43951490-43951616	-0.957227	0.000934758	0.0080826	rs9614293
chr2:168938410-168938536	-1.01355	6.21329e-05	0.00251944	rs482508
chr7:28156731-28156857	-0.870944	0.000261186	0.00449416	rs849135
chr17:47416397-47416523	-1.11186	0.000644256	0.00651596	rs56952963
chr10:100128158-100128284	1.50651	0.000306294	0.00468671	rs2077191
chr3:113284163-113284289	-1.19573	0.000349696	0.00503716	rs9864630
chr10:77766945-77767071	-1.67117	0.00122115	0.00917584	rs1866437
chr2:100992245-100992371	0.462403	0.000640942	0.00651596	rs55752012
chr22:17977060-17977186	0.921013	0.000431828	0.00543749	rs9605463
chr2:101020484-101020610	1.15247	0.000957877	0.00810691	rs17663443
chr7:28121697-28121823	-0.773072	0.00119436	0.00905973	rs6962289
chr9:6672947-6673073	1.05624	0.000842027	0.0077331	rs1003178091
chr1:88900722-88900848	-1.11001	0.00127141	0.00947856	rs4284240
chr4:145835511-145835637	-0.323787	0.00103258	0.00841304	rs13112857
chr3:37032814-37032940	-0.32457	0.000865515	0.00783419	rs3821826
chr2:113945562-113945688	-0.809549	0.00112142	0.00873594	rs11680166
chr3:142946070-142946196	-1.85787	0.000931615	0.0080826	rs12330903
chr17:67895885-67896011	0.684541	0.00089121	0.00790073	rs11653507
chr7:135258012-135258138	-0.599989	0.00135659	0.00976331	rs736168
chr16:58583966-58584092	0.69723	4.94295e-05	0.00241597	rs112974366
chr6:32640381-32640507	0.722585	0.000592053	0.00641276	rs9272640
chr17:17981170-17981296	-0.471464	3.21288e-05	0.0019278	rs4072738
chr1:88913141-88913267	-0.542898	0.000439884	0.00543749	rs9787246
chr9:133273750-133273876	0.954114	0.000210666	0.00392689	rs505922
chr16:79675149-79675275	-1.63601	0.000545445	0.00616713	rs11644799
chr10:99855195-99855321	0.544478	0.00060687	0.00644506	rs11816708
chr6:32609801-32609927	0.589336	0.000818442	0.00763349	rs535773
chr12:10461472-10461598	-1.2227	8.5728e-05	0.00281322	rs35078927
chr10:100116916-100117042	-0.835053	0.00100491	0.00830607	rs2862991
chr1:16104217-16104343	0.447332	0.00117186	0.00900301	rs61769927
chr11:119082429-119082555	0.40495	0.000934305	0.0080826	rs7127212
chr20:34567974-34568100	-0.542705	0.00019633	0.00377991	rs6088527
chr11:117030770-117030896	-0.710674	0.000535702	0.00611465	rs11216242
chr4:87257319-87257445	1.04462	0.000799604	0.00754587	rs28418877
chr22:17955485-17955611	0.293338	0.00026402	0.00449416	rs2099942
chr6:31757390-31757516	0.627344	0.000777026	0.00744557	rs3117574
chr6:32615259-32615385	0.633099	0.000203048	0.00383519	rs6605556
chr2:101031369-101031495	-1.08736	0.000947899	0.00810691	rs55771809
chr1:219463388-219463514	-0.58088	0.000596636	0.00641276	rs7546202
chr6:31371615-31371741	3.16195	0.000695083	0.00688477	rs2844563
