# Supplementary material for: Integrative functional genomics reveals transcriptional regulatory function of risk alleles for metabolic liver disease
Source: Research Square preprint supplement (doi:10.21203/rs.3.rs-6984670/v1), 2025-10-23
Supplement: Supplementary file 7 [file 5c8480de961c344fa701acf9.xlsx]

## Sheet: CRISPRia plasmid construction
Primer Name	Sequence (5' to 3')	Application
pUC19-5'AAVS1-F	CCTGCAGGTCGACTCTAGAGTGCTTTCTCTGACCTGCATTC	pUC19-AAVS1-dCas9-KRAB/MeCP2 plasmid construction
pUC19-5'AAVS1-R	CTGCAGGGACCACCTCCCTGTGGGGTGGAGGGGACAG
pUC19-3'AAVS1-F	TCATGTCTGTATACCGTCGACGTGGGGCCACTAGGGACAG
pUC19-3'AAVS1-R	TTGTAAAACGACGGCCAGTGGCTCAGTCTGAAGAGCAGAG
UCOE 0.7k-F	GGGAGGTGGTCCCTGCAG
UCOE 0.7k-R	GCCCTCCGCGCCTACAGC
VSC11712_CAGpro-F	GCTGTAGGCGCGGAGGGCCGCGTTACATAACTTACGGTA
VSC11712_CAGpro-R	CGAATTCGCTAGCTCTAGACCCTGTAGGAAAAAGAAGAAGGCA
#140690_dCas9-KRAB/MeCP2-F	GGTCTAGAGCTAGCGAATTCG
#140690_dCas9-KRAB/MeCP2-R	TGAGACTCTCTCAGTCACGG
#140690_T2A-BSD-WPRE-F	ACCCGTGACTGAGAGAGTCTCAGAGGGCAGAGGAAGTCTTCT
#140690_T2A-BSD-WPRE-R	TCGAAATCTCGTAGCACGTGTCGAGGTCGACGGTATCGA
#140690_SV40-polyA-F	CACGTGCTACGAGATTTCGATGCAATTGTTGTTGTTAACTTG
#140690_SV40-polyA-R	GTCGACGGTATACAGACATGACAGTTGATCCAGACATGATAAG
sgAAVS1_human_top	CACCGGGGCCACTAGGGACAGGAT	PX330-sgAAVS1_human plasmid construction
sgAAVS1_human_bottom	AAACATCCTGTCCCTAGTGGCCCC
#63798_VPR-F	GGGAGCAACGGCAGCAGCGGATCCgacgcattggacgattttg	pLX-TRE-dCas9-VPR-BSD plasmid construction
#63798_VPR-R	CTAACCGGTAGGGATCGAACCCTTTCATCAAAACAGAGATGTGTCGAAG
#140690_backbone-1F	CCTGATTCTGTGGATAACCG
#140690_backbone-1R	CCCCTTTGGGACCACTTTC
#140690_backbone-2F	TCTAAGTGGATCTGCGATCG
#140690_backbone-2R	CTCAAAGGCGGTAATACGG
#140690_backbone-3F	AAGGGTTCGATCCCTACCGGTTAG
#140690_backbone-3R	CTGCCCACTGACGGGCACCGGAGC
#140690_TRE-dCas9-F	GAGTTCGCTGCTGAAAGTGG
#140690_TRE-dCas9-R	GGATCCGCTGCTGCCGTTGCTCCC

## Sheet: SLC22A3 plasmid construction
Primer Name	Sequence (5' to 3')	Application
pcDNA3.1-SLC22A3-F	TATAGGGAGACCCAAGCTGGatgccctccttcgacgag	pcDNA3.1-SLC22A3 OE plasmid construction
pcDNA3.1-SLC22A3-R	TAGTGGATCCGAGCTCGGTACCtcaaaggtgagagcgggaaac

## Sheet: MPRA Lib construction
Primer Name	Sequence (5' to 3')	Application
pGL4.24-GFP-F	gtactgttggtaaagccaccatggtgagcaagggcgag	pGL4.24-miniP-GFP plasmid construction
pGL4.24-GFP-R	TATCATGTCTGCTCGAAGCttatcacttgtacagctcgtcc
first-round_F	CTGAGTACTGTATGGGCGG	MPRA plasmids library construction
first-round_R	taccggattgccaagctggaagtcgagcttccattatataccctctaTTGACACTTTTGTCGCTAGC
second-round_F	gaacatttctctggcctaactggccggtaccCTGAGTACTGTATGGGCGG
second-round_R	cagctcctcgcccttgctcaccatggtggctttaccaacagNNNNNNNNNNNNNNNNNNNNgttagatgcgctaagtaccggattgccaagctgga
CRS/BC_F	AATGATACGGCGACCACCGAGATCTACACGCGATCTATCGTCGGCAGCGTCAGATGTGTATAAGAGACAGggcctaactggccGGTACC	CRS/barcode pairings
CRS/BC_R	CAAGCAGAAGACGGCATACGAGATTTCTGCCTGTCTCGTGGGCTCGGAGATGTGTATAAGAGACAGtcaccatggtggctttaccaacag
MPRA_BCshort_F	cttggcaatccggtacttagcg
MPRA_BCshort_R	ggtgcagatgaacttcagggtcag	first-strand cDNA library synthesis
MPRA_BClong_P5i5_F (DNA-1)	AATGATACGGCGACCACCGAGATCTACACGTAAGGAGTCGTCGGCAGCGTCAGATGTGTATAAGAGACAGcttggcaatccggtacttagcgc	MPRA_DNA_Lib generation
MPRA_BClong_P5i5_F (DNA-2)	AATGATACGGCGACCACCGAGATCTACACTAGATCGCTCGTCGGCAGCGTCAGATGTGTATAAGAGACAGcttggcaatccggtacttagcgc
MPRA_BClong_P5i5_F (DNA-3)	AATGATACGGCGACCACCGAGATCTACACACTGCATATCGTCGGCAGCGTCAGATGTGTATAAGAGACAGcttggcaatccggtacttagcgc
MPRA_BClong_P5i5_F (DNA-4)	AATGATACGGCGACCACCGAGATCTACACCTCTCTATTCGTCGGCAGCGTCAGATGTGTATAAGAGACAGcttggcaatccggtacttagcgc
MPRA_BClong_P7i7_R (DNA-1)	CAAGCAGAAGACGGCATACGAGATGCTCAGGAGTCTCGTGGGCTCGGAGATGTGTATAAGAGACAGggtgcagatgaacttcagggtcagc
MPRA_BClong_P7i7_R (DNA-2)	CAAGCAGAAGACGGCATACGAGATCATGCCTAGTCTCGTGGGCTCGGAGATGTGTATAAGAGACAGggtgcagatgaacttcagggtcagc
MPRA_BClong_P7i7_R (DNA-3)	CAAGCAGAAGACGGCATACGAGATTGCCTCTTGTCTCGTGGGCTCGGAGATGTGTATAAGAGACAGggtgcagatgaacttcagggtcagc
MPRA_BClong_P7i7_R (DNA-4)	CAAGCAGAAGACGGCATACGAGATTCCTCTACGTCTCGTGGGCTCGGAGATGTGTATAAGAGACAGggtgcagatgaacttcagggtcagc
MPRA_BClong_P5i5_F (RNA-1)	AATGATACGGCGACCACCGAGATCTACACAAGGAGTATCGTCGGCAGCGTCAGATGTGTATAAGAGACAGcttggcaatccggtacttagcgc	MPRA_RNA_Lib generation
MPRA_BClong_P5i5_F (RNA-2)	AATGATACGGCGACCACCGAGATCTACACTATCCTCTTCGTCGGCAGCGTCAGATGTGTATAAGAGACAGcttggcaatccggtacttagcgc
MPRA_BClong_P5i5_F (RNA-3)	AATGATACGGCGACCACCGAGATCTACACCTAAGCCTTCGTCGGCAGCGTCAGATGTGTATAAGAGACAGcttggcaatccggtacttagcgc
MPRA_BClong_P5i5_F (RNA-4)	AATGATACGGCGACCACCGAGATCTACACAGAGTAGATCGTCGGCAGCGTCAGATGTGTATAAGAGACAGcttggcaatccggtacttagcgc
MPRA_BClong_P7i7_R (RNA-1)	CAAGCAGAAGACGGCATACGAGATTCGCCTTAGTCTCGTGGGCTCGGAGATGTGTATAAGAGACAGggtgcagatgaacttcagggtcagc
MPRA_BClong_P7i7_R (RNA-2)	CAAGCAGAAGACGGCATACGAGATAGCGTAGCGTCTCGTGGGCTCGGAGATGTGTATAAGAGACAGggtgcagatgaacttcagggtcagc
MPRA_BClong_P7i7_R (RNA-3)	CAAGCAGAAGACGGCATACGAGATGTAGAGAGGTCTCGTGGGCTCGGAGATGTGTATAAGAGACAGggtgcagatgaacttcagggtcagc
MPRA_BClong_P7i7_R (RNA-4)	CAAGCAGAAGACGGCATACGAGATCCTCTCTGGTCTCGTGGGCTCGGAGATGTGTATAAGAGACAGggtgcagatgaacttcagggtcagc
P5	AATGATACGGCGACCACCGAGATCTACAC	MPRA_DNA/RNA_Lib generation
P7	CAAGCAGAAGACGGCATACGAGAT

## Sheet: sgRNA oligos
Oligo Name	Top oligo (5' to 3')	Bottom oligo (5' to 3')	Application
sgi_rs11009914_1	CACCGTACAGTCACCACTACTCGGC	AAACGCCGAGTAGTGGTGACTGTAC	CROPi-seq plasmid library construction (Addgene, #127458, Puro)
sgi_rs11009914_2	CACCGAGGAGTTCAAGGTTATAGTG	AAACCACTATAACCTTGAACTCCTC	CROPi-seq plasmid library construction (Addgene, #127458, Puro)
sgi_rs13395911_1	CACCGCAAAGTTAACAGGTTCAGTG	AAACCACTGAACCTGTTAACTTTGC	CROPi-seq plasmid library construction (Addgene, #127458, Puro)
sgi_rs13395911_2	CACCGTGGACACATACGGAAGGCTC	AAACGAGCCTTCCGTATGTGTCCAC	CROPi-seq plasmid library construction (Addgene, #127458, Puro)
sgi_rs2033493_1	CACCGCATCTCCATGGAGACACGCT	AAACAGCGTGTCTCCATGGAGATGC	CROPi-seq plasmid library construction (Addgene, #127458, Puro)
sgi_rs2033493_2	CACCGGGCTTTGCCTGGTTGATGGT	AAACACCATCAACCAGGCAAAGCCC	CROPi-seq plasmid library construction (Addgene, #127458, Puro)
sgi_rs133024_1	CACCGGCATTTTGAGACGAGGGCCT	AAACAGGCCCTCGTCTCAAAATGCC	CROPi-seq plasmid library construction (Addgene, #127458, Puro)
sgi_rs133024_2	CACCGCTGAGCGAGGCTTGCTCAAC	AAACGTTGAGCAAGCCTCGCTCAGC	CROPi-seq plasmid library construction (Addgene, #127458, Puro)
sgi_rs2596539_1	CACCGAACTCCGTCGCAAAAACTTT	AAACAAAGTTTTTGCGACGGAGTTC	CROPi-seq plasmid library construction (Addgene, #127458, Puro)
sgi_rs2596539_2	CACCGGCGGTCGCTTACATAACCCA	AAACTGGGTTATGTAAGCGACCGCC	CROPi-seq plasmid library construction (Addgene, #127458, Puro)
sgi_rs474513_1	CACCGAAGATAAGGAACGCGGTGCT	AAACAGCACCGCGTTCCTTATCTTC	CROPi-seq plasmid library construction (Addgene, #127458, Puro)
sgi_rs474513_2	CACCGGCCCGCACACCTCAAAGATA	AAACTATCTTTGAGGTGTGCGGGCC	CROPi-seq plasmid library construction (Addgene, #127458, Puro)
sgi_rs28639626_1	CACCGGCCAAGACGCAAGTTTTTAC	AAACGTAAAAACTTGCGTCTTGGCC	CROPi-seq plasmid library construction (Addgene, #127458, Puro)
sgi_rs28639626_2	CACCGGGTCAACCACAGGGGTAGAA	AAACTTCTACCCCTGTGGTTGACCC	CROPi-seq plasmid library construction (Addgene, #127458, Puro)
sgi_rs55645497_1	CACCGATCAACTATCCCCCTCCACT	AAACAGTGGAGGGGGATAGTTGATC	CROPi-seq plasmid library construction (Addgene, #127458, Puro)
sgi_rs55645497_2	CACCGGAAGCTGACACCCTAGTGGA	AAACTCCACTAGGGTGTCAGCTTCC	CROPi-seq plasmid library construction (Addgene, #127458, Puro)
sgi_rs10775579_1	CACCGCTTGGCTTGAGCACCAGATA	AAACTATCTGGTGCTCAAGCCAAGC	CROPi-seq plasmid library construction (Addgene, #127458, Puro)
sgi_rs10775579_2	CACCGGTGGAAGCTACCATGAGGAG	AAACCTCCTCATGGTAGCTTCCACC	CROPi-seq plasmid library construction (Addgene, #127458, Puro)
sgi_rs483082_1	CACCGCCTACTGCCAGGCTGACACG	AAACCGTGTCAGCCTGGCAGTAGGC	CROPi-seq plasmid library construction (Addgene, #127458, Puro)
sgi_rs483082_2	CACCGGGGTCTGGGAAGCAGACATC	AAACGATGTCTGCTTCCCAGACCCC	CROPi-seq plasmid library construction (Addgene, #127458, Puro)
sgi_rs10452935_1	CACCGACTGCGGCTTGTCGGACAGT	AAACACTGTCCGACAAGCCGCAGTC	CROPi-seq plasmid library construction (Addgene, #127458, Puro)
sgi_rs10452935_2	CACCGGTGCAAGTGACACAGATAAC	AAACGTTATCTGTGTCACTTGCACC	CROPi-seq plasmid library construction (Addgene, #127458, Puro)
sgi_rs201212687_1	CACCGCTATTTTGGAGGGGCAACCT	AAACAGGTTGCCCCTCCAAAATAGC	CROPi-seq plasmid library construction (Addgene, #127458, Puro)
sgi_rs201212687_2	CACCGGGTCAGTCCTCATAATGCCA	AAACTGGCATTATGAGGACTGACCC	CROPi-seq plasmid library construction (Addgene, #127458, Puro)
sgi_rs113843561_1	CACCGAGCTACTAGAGGACCTTCAG	AAACCTGAAGGTCCTCTAGTAGCTC	CROPi-seq plasmid library construction (Addgene, #127458, Puro)
sgi_rs113843561_2	CACCGAGTAGCTTGGCATTACCATA	AAACTATGGTAATGCCAAGCTACTC	CROPi-seq plasmid library construction (Addgene, #127458, Puro)
sgi_rs9270894_1	CACCGGAGCTGAAGTACACTAAGAA	AAACTTCTTAGTGTACTTCAGCTCC	CROPi-seq plasmid library construction (Addgene, #127458, Puro)
sgi_rs9270894_2	CACCGAGGCTCCCTTAAATAATACT	AAACAGTATTATTTAAGGGAGCCTC	CROPi-seq plasmid library construction (Addgene, #127458, Puro)
sgi_rs502273_1	CACCGCGTGGGTTCAGATCTCAGAT	AAACATCTGAGATCTGAACCCACGC	CROPi-seq plasmid library construction (Addgene, #127458, Puro)
sgi_rs502273_2	CACCGCAGATTGGCTACTTGTCAGC	AAACGCTGACAAGTAGCCAATCTGC	CROPi-seq plasmid library construction (Addgene, #127458, Puro)
sgi_rs687339_1	CACCGCACCATTTGTACTTATGCCC	AAACGGGCATAAGTACAAATGGTGC	CROPi-seq plasmid library construction (Addgene, #127458, Puro)
sgi_rs687339_2	CACCGGGTCCACTCTGAATATTTGC	AAACGCAAATATTCAGAGTGGACCC	CROPi-seq plasmid library construction (Addgene, #127458, Puro)
sgi_rs1883711_1	CACCGGCAGACCATGGACATTGGGA	AAACTCCCAATGTCCATGGTCTGCC	CROPi-seq plasmid library construction (Addgene, #127458, Puro)
sgi_rs1883711_2	CACCGTCATTGGTCTGGACAGTAGG	AAACCCTACTGTCCAGACCAATGAC	CROPi-seq plasmid library construction (Addgene, #127458, Puro)
sgi_rs10889356_1	CACCGCAGCACTAGACAGGAAGTTA	AAACTAACTTCCTGTCTAGTGCTGC	CROPi-seq plasmid library construction (Addgene, #127458, Puro)
sgi_rs10889356_2	CACCGGTTATGGATCTGACTAATTG	AAACCAATTAGTCAGATCCATAACC	CROPi-seq plasmid library construction (Addgene, #127458, Puro)
sgi_rs12158906_1	CACCGTAGCAAAAGATTCAAAAGGC	AAACGCCTTTTGAATCTTTTGCTAC	CROPi-seq plasmid library construction (Addgene, #127458, Puro)
sgi_rs12158906_2	CACCGAGGCTGGCTAATGTTTAGCC	AAACGGCTAAACATTAGCCAGCCTC	CROPi-seq plasmid library construction (Addgene, #127458, Puro)
sgi_rs1658973_1	CACCGTTAAGTGGGTCACCTCACTG	AAACCAGTGAGGTGACCCACTTAAC	CROPi-seq plasmid library construction (Addgene, #127458, Puro)
sgi_rs1658973_2	CACCGAGTGCTGGATTACACCACCA	AAACTGGTGGTGTAATCCAGCACTC	CROPi-seq plasmid library construction (Addgene, #127458, Puro)
sgihuCon_1	CACCGTGCACCCGGCTAGGACCGG	AAACCCGGTCCTAGCCGGGTGCAC	Negative Ctrl in CROPi-seq plasmid library construction (Addgene, #127458, Puro)
sgihuCon_2	CACCGTGTGCAACCTCCGCCGTTG	AAACCAACGGCGGAGGTTGCACAC	Negative Ctrl in CROPi-seq plasmid library construction (Addgene, #127458, Puro)
sgihuCon_3	CACCGCCCGAGCAGTGGCTCGCTA	AAACTAGCGAGCCACTGCTCGGGC	Negative Ctrl in CROPi-seq plasmid library construction (Addgene, #127458, Puro)
sgihuCon_4	CACCGGTCAGGTAGAGGGATTGAG	AAACCTCAATCCCTCTACCTGACC	Negative Ctrl in CROPi-seq plasmid library construction (Addgene, #127458, Puro)
sgihuCon_5	CACCGCGCGGAAATTTTACCGACGA	AAACTCGTCGGTAAAATTTCCGCGC	Negative Ctrl in CROPi-seq plasmid library construction (Addgene, #127458, Puro)
sgihuCon_6	CACCGCGTGTGTGGGTAAACGGAAA	AAACTTTCCGTTTACCCACACACGC	Negative Ctrl in CROPi-seq plasmid library construction (Addgene, #127458, Puro)
Oligo Name	Top oligo (5' to 3')	Bottom oligo (5' to 3')	Application
rs474513_1	CACCGGGGCTCAGGCAGATAACGAA	AAACTTCGTTATCTGCCTGAGCCCC	Exci-sgRNA plasmid construction (lentiCRISPR-v2-Puro)
rs474513_2	CACCGAAACGGCCTCAATTGAGCAT	AAACATGCTCAATTGAGGCCGTTTC	Exci-sgRNA plasmid construction (lentiCRISPR-v2-Blast)
rs10889356_1	CACCGGTTATGGATCTGACTAATTG	AAACCAATTAGTCAGATCCATAACC	Exci-sgRNA plasmid construction (lentiCRISPR-v2-Puro)
rs10889356_2	CACCGGTCAAGGCTATCACTGTACC	AAACGGTACAGTGATAGCCTTGACC	Exci-sgRNA plasmid construction (lentiCRISPR-v2-Blast)
rs1748197_1	CACCGAAGATTCCTGAGGCGATGGT	AAACACCATCGCCTCAGGAATCTTC	Exci-sgRNA plasmid construction (lentiCRISPR-v2-Puro)
rs1748197_2	CACCGACTCAATAAACATTGCAATG	AAACCATTGCAATGTTTATTGAGTC	Exci-sgRNA plasmid construction (lentiCRISPR-v2-Blast)
rs10790167_1	CACCGTATAACTATAGGGGTACTGA	AAACTCAGTACCCCTATAGTTATAC	Exci-sgRNA plasmid construction (lentiCRISPR-v2-Puro)
rs10790167_2	CACCGTGTAAACCTACGAGGTCTAG	AAACCTAGACCTCGTAGGTTTACAC	Exci-sgRNA plasmid construction (lentiCRISPR-v2-Blast)
rs1441754_1	CACCGATAAACTGGCAACTCAACAT	AAACATGTTGAGTTGCCAGTTTATc	Exci-sgRNA plasmid construction (lentiCRISPR-v2-Puro)
rs1441754_2	CACCGCTGTACTTAGCAGAGTCGCT	AAACAGCGACTCTGCTAAGTACAGc	Exci-sgRNA plasmid construction (lentiCRISPR-v2-Blast)
rs66477683_1	CACCGACATATATTGGAGTGGCCGA	AAACTCGGCCACTCCAATATATGTC	Exci-sgRNA plasmid construction (lentiCRISPR-v2-Puro)
rs66477683_2	CACCGCAGGACCCCCTTTGTAATAA	AAACTTATTACAAAGGGGGTCCTGC	Exci-sgRNA plasmid construction (lentiCRISPR-v2-Blast)
Exci-sgNC_1	CACCGCCGCGCCGTTAGGGAACGAG	AAACCTCGTTCCCTAACGGCGCGGC	Exci-sgRNA plasmid construction (lentiCRISPR-v2-Puro)
Exci-sgNC_2	CACCGGCGAGGTATTCGGCTCCGCG	AAACCGCGGAGCCGAATACCTCGCC	Exci-sgRNA plasmid construction (lentiCRISPR-v2-Blast)
Oligo Name	Top oligo (5' to 3')	Bottom oligo (5' to 3')	Application
CRISPRi/a-sg_rs2862926_1	CACCGTAGGATGATTGGTACTGTGG	AAACCCACAGTACCAATCATCCTAC	CRISPRi/a-sgRNA plasmid construction (Addgene, #127458, Puro)
CRISPRi/a-sg_rs2862926_2	CACCGGGGTAGGCCTAGTACTGTAG	AAACCTACAGTACTAGGCCTACCCC	CRISPRi/a-sgRNA plasmid construction (Addgene, #127458, Puro)
CRISPRi/a-sg_rs2862926_3	CACCGTGATTGGTACTGTGGCGGGT	AAACACCCGCCACAGTACCAATCAC	CRISPRi/a-sgRNA plasmid construction (Addgene, #127458, Puro)
CRISPRi/a-sg_rs3752659_1	CACCGTATAGTGGCCATACCCTAGG	AAACCCTAGGGTATGGCCACTATAC	CRISPRi/a-sgRNA plasmid construction (Addgene, #127458, Puro)
CRISPRi/a-sg_rs3752659_2	CACCGTAATGCGTCCACCTAGGGTA	AAACTACCCTAGGTGGACGCATTAC	CRISPRi/a-sgRNA plasmid construction (Addgene, #127458, Puro)
CRISPRi/a-sg_rs3752659_3	CACCGCTGCATAATGCGTCCACCTA	AAACTAGGTGGACGCATTATGCAGC	CRISPRi/a-sgRNA plasmid construction (Addgene, #127458, Puro)
CRISPRi/a-sg_rs1748197_1	CACCGAGAACAGAATCCAAAGCACA	AAACTGTGCTTTGGATTCTGTTCTC	CRISPRi/a-sgRNA plasmid construction (Addgene, #127458, Puro)
CRISPRi/a-sg_rs1748197_2	CACCGATTCTCAGTACCTATCACAC	AAACGTGTGATAGGTACTGAGAATC	CRISPRi/a-sgRNA plasmid construction (Addgene, #127458, Puro)
CRISPRi/a-sg_rs1748197_3	CACCGAAGATTCCTGAGGCGATGGT	AAACACCATCGCCTCAGGAATCTTC	CRISPRi/a-sgRNA plasmid construction (Addgene, #127458, Puro)
CRISPRi/a-sg_rs483082_1	CACCGCCTACTGCCAGGCTGACACG	AAACCGTGTCAGCCTGGCAGTAGGC	CRISPRi/a-sgRNA plasmid construction (Addgene, #127458, Puro)
CRISPRi/a-sg_rs483082_2	CACCGGGGTCTGGGAAGCAGACATC	AAACGATGTCTGCTTCCCAGACCCC	CRISPRi/a-sgRNA plasmid construction (Addgene, #127458, Puro)
CRISPRi/a-sg_rs9605461_1	CACCGACATAAGTTCTGAGTATTAA	AAACTTAATACTCAGAACTTATGTC	CRISPRi/a-sgRNA plasmid construction (Addgene, #127458, Puro)
CRISPRi/a-sg_rs9605461_2	CACCGTTCTGAGTATTAAAGGTTA	AAACTAACCTTTAATACTCAGAAC	CRISPRi/a-sgRNA plasmid construction (Addgene, #127458, Puro)
CRISPRi/a-sg_rs12158906_1	CACCGGGCCCATCTATGTACTTCCT	AAACAGGAAGTACATAGATGGGCCC	CRISPRi/a-sgRNA plasmid construction (Addgene, #127458, Puro)
CRISPRi/a-sg_rs12158906_2	CACCGAGGCTGGCTAATGTTTAGCC	AAACGGCTAAACATTAGCCAGCCTC	CRISPRi/a-sgRNA plasmid construction (Addgene, #127458, Puro)
CRISPRi/a-sg_rs1306476_1	CACCGGAGGTGGGAGATCACAAGCC	AAACGGCTTGTGATCTCCCACCTCC	CRISPRi/a-sgRNA plasmid construction (Addgene, #127458, Puro)
CRISPRi/a-sg_rs1306476_2	CACCGGATCACAAGCCTGGAGTCTG	AAACCAGACTCCAGGCTTGTGATCC	CRISPRi/a-sgRNA plasmid construction (Addgene, #127458, Puro)
CRISPRi/a-sg_rs1658973_1	CACCGGACAGAGCTTTACACCAAC	AAACGTTGGTGTAAAGCTCTGTCC	CRISPRi/a-sgRNA plasmid construction (Addgene, #127458, Puro)
CRISPRi/a-sg_rs1658973_2	CACCGCATTTGAGATAAAACACCCA	AAACTGGGTGTTTTATCTCAAATGC	CRISPRi/a-sgRNA plasmid construction (Addgene, #127458, Puro)
CRISPRi/a-sg_rs474513_1	CACCGAAGATAAGGAACGCGGTGCT	AAACAGCACCGCGTTCCTTATCTTC	CRISPRi/a-sgRNA plasmid construction (Addgene, #127459, Puro)
CRISPRi/a-sg_rs474513_2	CACCGGCCCGCACACCTCAAAGATA	AAACTATCTTTGAGGTGTGCGGGCC	CRISPRi/a-sgRNA plasmid construction (Addgene, #127460, Puro)
CRISPRi/a-sg_rs10889356_1	CACCGCAGCACTAGACAGGAAGTTA	AAACTAACTTCCTGTCTAGTGCTGC	CRISPRi/a-sgRNA plasmid construction (Addgene, #127461, Puro)
CRISPRi/a-sg_rs10889356_2	CACCGGTTATGGATCTGACTAATTG	AAACCAATTAGTCAGATCCATAACC	CRISPRi/a-sgRNA plasmid construction (Addgene, #127462, Puro)
CRISPRi/a-sg_rs10452935_1	CACCGACTGCGGCTTGTCGGACAGT	AAACACTGTCCGACAAGCCGCAGTC	CRISPRi/a-sgRNA plasmid construction (Addgene, #127463, Puro)
CRISPRi/a-sg_rs10452935_2	CACCGGTGCAAGTGACACAGATAAC	AAACGTTATCTGTGTCACTTGCACC	CRISPRi/a-sgRNA plasmid construction (Addgene, #127464, Puro)
CRISPRi/a-sgNC_1	CACCGTGCACCCGGCTAGGACCGG	AAACCCGGTCCTAGCCGGGTGCAC	CRISPRi/a-sgRNA plasmid construction (Addgene, #127458, Puro)
CRISPRi/a-sgNC_2	CACCGTGTGCAACCTCCGCCGTTG	AAACCAACGGCGGAGGTTGCACAC	CRISPRi/a-sgRNA plasmid construction (Addgene, #127458, Puro)

## Sheet: Gene editing
epegRNA_dsODN for rs474513(G>A)				ATCTTGTGGAAAGGACGAAACACCGTCTCTGGGGTGAGCGACGTGTTTTAGAGCTAGAAATAGCAAGTTAAAATAAGGCTAGTCCGTTATCAACTTGAAAAAGTGGCACCGAGTCGGTGCACCCTGGAGACCATAAGCGAATCCGGAACTGCCAACGTCGCTCACCCCAGCGCGGTTCTATCTAGTTACGCGTT
nickRNA_dsODN for rs474513				ATCTTGTGGAAAGGACGAAACACCGTTCGCCCTTTCCTTTGACCCGTTTTAGAGCTAGAAATAGCAAGTTAAAATAAGGCTAGTCCGTTATCAACTTGAAAAAGTGGCACCGAGTCGGTGCCGCGTTTTTTTAAGCTTGGGCCGC

## Sheet: CROPi-seq sgRNA Enrichment
Primer Name	Sequence (5' to 3')	Application
1st_erPCR_F	TTTCCCATGATTCCTTCATATTTGC	sgRNA Enrichment for CROPi-seq
1st_erPCR_R	CTACACGACGCTCTTCCGATCT
2nd_erPCR_F	GTGACTGGAGTTCAGACGTGTGCTCTTCCGATCTCTTGTGGAAAGGACGAAACAC
3rd_erPCR_F	CAAGCAGAAGACGGCATACGAGATTTCTGCCTGTGACTGGAGTTCAGACGTGT
2nd/3rd_erPCR_R	AATGATACGGCGACCACCGAGATCTACACGCGATCTAACACTCTTTCCCTACACGACGCTC

## Sheet: Deletion effect PCR primer
Primer Name	Sequence (5' to 3')	Application
pEE-rs474513-F	GGAAGTGCCGCGTCGTAAATG	for deletion effect estimation
pEE-rs474513-R	CATCCAAGTCCATGCCCTGTCC
pEE-rs10889356-F	TGTCCTGGTGGAATATGTTGG
pEE-rs10889356-R	CGTACTTACCATGAACCAGGC
pEE-rs1748197-F	AGGGTCAGGAATAAAAAGGAGGT
pEE-rs1748197-R	TGGCTGCAGTGTGATTCTGT
pEE-rs10790167-F	CTGTAACAGCGCACTGGGTA
pEE-rs10790167-R	GACTATGTGTTAAGTCCAGGC
pEE-rs1441754-F	TTAGTTAGGAAGCCATGGCAA
pEE-rs1441754-R	ATCATCCAGCACCAATTCCC
pEE-rs66477683-F	TTACATAGGAGATAATAGCAGCACACTT
pEE-rs66477683-R	GTCATGATTTCTGGCTTACAACTCC

## Sheet: RT-qPCR primer
Primer Name	Sequence (5' to 3')	Application
hRT_GLDC_F	CCAGACACGACGACTTCGC	qRT-PCR
hRT_GLDC_R	CAATTCATCAATGCTCGCCAG
hRT_KDM4C_F	ATGCCCGATTTCTCTGCGATG
hRT_KDM4C_R	GGGCTCCTTTAGACTCCATGTAT
hRT_BAZ1B_F	GAACTCCAGTCAGATTGCTCAG
hRT_BAZ1B_R	GCGATCTACGTGCTCTGTCATTA
hRT_FZD9_F	TGCGAGAACCCCGAGAAGT
hRT_FZD9_R	GGGACCAGAACACCTCGAC
hRT_MICAL3_F	TCCAAGGACTTATACAGCCTCC
hRT_MICAL3_R	CAAGGTGTTCCTCCGACCAT
hRT_TOMM40_F	GTTCCCTGTACTGGTGGGTG
hRT_TOMM40_R	TGGGCTACGAGGATTCCTGA
hRT_ABCB4_F	CAACTATCCCACCCGAGCAA
hRT_ABCB4_R	AACCAAAGTCCACAAACACTGTC
hRT_ANGPTL3_F	CATCTAGTTGCGATTACTGGCA
hRT_ANGPTL3_R	CCTCCTGAATAACCCTCTGGA
hRT_IL18R1_F	CCTTGACCCTTTGGGTGCTTA
hRT_IL18R1_R	CTCATGTGCAAGTGAACACGA
hRT_CPN1_F	CATCACGCGGGTCTACAGC
hRT_CPN1_R	CTTCGTTGCCGTGCATGTT
hRT_SLC22A3_F	CCTTGTCTGTGTCAATGCGTGG
hRT_SLC22A3_R	CCAACACCAAGGCAGGATAGCA
hRT_LPA_F	CATTCCAGGGACAAATAAATGGGC
hRT_LPA_R	TCAAATGAAGAGGATGCACAGAGA
hRT_USP1_F	GCTTTGGGCCATGACCAGATATAA
hRT_USP1_R	ACTGTGCTGCAGGAACAACT
hRT_HPRT1_F	TGACACTGGCAAAACAATGCA
hRT_HPRT1_R	GGTCCTTTTCACCAGCAAGCT
hRT_OCT4_F	GACAGGGGGAGGGGAGGAGCTAGG
hRT_OCT4_R	CTTCCCTCCAACCAGTTGCCCCAAAC
hRT_SOX17_F	CAAGGGCGAGTCCCGTATC
hRT_SOX17_R	CGACTTGCCCAGCATCTTGC
hRT_CYP2A9_F	CAAGATTTTGAGCAGCCCCTG
hRT_CYP2A9_R	TGGTTGTGCTTTTCCTTCTCCA
hRT_AFP_F	GCAGAGGAGATGTGCTGGATTG
hRT_AFP_R	CGTGGTCAGTTTGCAGCATTCTG
hRT_Albumin_F	GCACAGAATCCTTGGTGAACAG
hRT_Albumin_R	ATGGAAGGTGAATGTTTCAGCA
hRT_PLIN2_F	CAGGCGACATCTACTCAGTGT
hRT_PLIN2_R	TAAAAGGGACCTACCAGCCAGT
hRT_CK7_F	TGTGGATGCTGCCTACATGAGC
hRT_CK7_R	AGCACCACAGATGTGTCGGAGA
hRT_CD68_F	GGAAATGCCACGGTTCATCCA
hRT_CD68_R	TGGGGTTCAGTACAGAGATGC
hRT_APOA5_F	GCTGGTGGGCTGGAATTTG
hRT_APOA5_R	CTCGGCGTATGGGTGGAAG
hRT_LPL_F	ACAAGAGAGAACCAGACTCCAA
hRT_LPL_R	GCGGACACTGGGTAATGCT
hRT_MERTK_F	CTCTGGCGTAGAGCTATCACT
hRT_MERTK_R	AGGCTGGGTTGGTGAAAACA
hRT_TIMP1_F	CTGTTGGCTGTGAGGAATGC
hRT_TIMP1_R	CTGGAAGCCCTTTTCAGAGC
hRT_COL1A1_F	GAGACACTGGTGCTAAGGGA
hRT_COL1A1_R	TCGCTTTCCTTCCTCTCCAG
hRT_ACTA2_F	CTGCTGAGCGTGAGATTGTC
hRT_ACTA2_R	TCAAGGGAGGATGAGGATGC
