# Supplementary material for: Integrative functional genomics reveals transcriptional regulatory function of risk alleles for metabolic liver disease
Source: Research Square preprint supplement (doi:10.21203/rs.3.rs-6984670/v1), 2025-10-23
Supplement: Supplementary file 8 [file bfc08cbd3cf616067ccf819a.xlsx]

## Sheet: CROP-seq (20)
Table S6. 20 DAVs for CROP-seq
DAV (rsid)	HepG2 MPRA data					overlapping cell-type-specific peaks			DAV target genes
	Ctrl_log2FC	Ctrl_FDR	PAOA_log2FC	PAOA_FDR		Hepatocyte	Stellate	Kupffer
rs11009914	1.94311	0.00783376	2.32971	0.00641276		Yes	NO	NO	PARD3
rs13395911	1.05534	0.0143147	1.08273	0.00326978		Yes	NO	NO	EFHD1;RN7SL359P;GIGYF2
rs2033493	1.03299	0.00235251	0.952961	0.00449416		NO	Yes	NO	DNMT1;S1PR2;MRPL4
rs133024	0.800144	0.00529189	0.835587	0.00334663		Yes	NO	NO	PLA2G6;BAIAP2L2;MAFF;PDXP
rs2596539	1.03327	0.0656385	0.83446	0.0409332		Yes	Yes	Yes	HCP5;HLA-S;MICA;APOM;BRD2;DDX39B;MCCD1;RPL15P4;SYNGAP1;UBR2
rs474513	0.678258	0.0163168	0.790731	0.00281322		Yes	Yes	NO	SLC22A3;LPA;CHP1P2;PLG
rs28639626	0.689716	0.0018918	0.542088	0.00186154		Yes	NO	NO	MLXIP
rs55645497	0.555556	0.00783376	0.580353	0.0130814		Yes	NO	NO	GPAM;ACSL5;TECTB;
rs10775579	-0.646307	0.00823966	-0.582237	0.0182768		Yes	NO	NO	CEBPG;PEPD;AKR1B1P7;CEBPA
rs483082	-0.659864	0.0215739	-0.5014	0.012471		Yes	NO	Yes	APOC1;APOC1P1;APOE;TOMM40;APOC2;APOC4-APOC2
rs10452935	-0.569575	0.00527665	-0.670516	0.00487905		Yes	NO	NO	ABCB4;ABCB1;CROT;DBF4;DMTF1;SLC25A40;STEAP2;TMEM243;TP53TG1
rs201212687	-0.771222	0.00976958	-0.790957	0.00276089		Yes	NO	NO	EFHD1;RN7SL359P
rs113843561	-1.18678	0.00842713	-0.989923	0.012471		NO	NO	Yes	PPARG
rs9270894	-0.821167	0.006302	-1.10978	0.00543749		Yes	Yes	Yes	HLA-DRB1;AGPAT1;C4A;HLA-DMA;HLA-DRB5;HLA-DMB;HLA-DQA1;HLA-DQB1;HLA-DRB9
rs502273	-1.24171	0.00213102	-1.1404	0.00377991		Yes	NO	NO	SESN2;ATP5IF1;DNAJC8;MED18;RCC1;SNHG3;SNORA73A;SNORA73B
rs678339	-1.23845	0.0133153	-1.25718	0.0161035		Yes	NO	NO	MSL2;RPL31P23;PCCB
rs1883711	-1.40595	0.00505154	-1.36703	0.00371014		Yes	Yes	Yes	MAFB
rs10889356	-1.753	0.00134275	-1.78264	0.00300025		Yes	NO	NO	DOCK7;USP1
rs12158906	-1.96882	6.08295e-05	-1.89022	0.00222728		Yes	NO	NO	MICAL3;PEX26
rs1658973	-2.23876	0.000960857	-2.45478	0.00129712		Yes	Yes	Yes	GLDC;RN7SL123P;RNF2P1;RPL35AP20;RPS3AP54;BRD10;KDM4C
