# Supplementary material for: Integrative functional genomics reveals transcriptional regulatory function of risk alleles for metabolic liver disease
Source: Research Square preprint supplement (doi:10.21203/rs.3.rs-6984670/v1), 2025-10-23
Supplement: Supplementary file 9 [file cdb18a66f49f0fa0e4980ef1.xlsx]

## Sheet: Lx2_Ctrl_DAVs
Table S3. DAVs identified in LX-2 cells.
coordination	log2(Fold change)	pValue	FDR	rsid
chr1:16199329-16199455	0.416853	0.000126202	0.00311128	rs221033
chr1:16206547-16206673	-0.352062	0.000300154	0.00430138	rs221054
chr1:23172845-23172971	-1.65449	3.90344e-05	0.00201398	rs116399264
chr1:28287896-28288022	0.78244	6.28125e-05	0.00225856	rs61551936
chr1:62670221-62670347	0.975478	0.0006074	0.00553923	rs181835401
chr1:62689615-62689741	-0.86731	0.000376135	0.0045327	rs10889356
chr1:88653952-88654078	-1.27199	6.70955e-05	0.0023546	rs7530690
chr1:93287362-93287488	-0.468082	0.00024793	0.00397478	rs61799516
chr10:100046432-100046558	2.5774	0.000651483	0.00583552	rs4919420
chr10:100046506-100046632	1.9238	2.58501e-05	0.00179555	rs7897739
chr10:100095603-100095729	0.602214	3.77801e-05	0.00201398	rs4375373
chr10:112240595-112240721	1.53163	0.000946597	0.0070524	rs12416473
chr10:112924155-112924281	-0.3786	0.00133383	0.0084126	rs12255439
chr10:77920578-77920704	0.708938	0.000292838	0.00423605	rs2278218
chr10:79145213-79145339	-0.837306	4.52959e-05	0.00201398	rs780156
chr10:99848910-99849036	-0.854856	6.18137e-05	0.00225856	rs111866537
chr11:116859959-116860085	-0.319913	0.000203589	0.00370367	rs567312
chr11:117010019-117010145	0.232346	0.00113759	0.00784468	rs7127881
chr11:117030770-117030896	-4.59385	3.14262e-05	0.00192926	rs11216242
chr11:61781490-61781616	-0.254903	0.00148279	0.00888559	rs174533
chr11:61842215-61842341	2.56192	0.000370468	0.0045327	rs174583
chr12:10464069-10464195	-2.61345	0.000121244	0.00305171	rs7342353
chr12:121176472-121176598	0.212067	0.000616861	0.00560011	rs2686377
chr12:121179841-121179967	-1.02637	5.7618e-07	0.000725123	rs2686380
chr12:121182900-121183026	1.68939	0.000159397	0.00341284	rs2915641
chr12:122116679-122116805	-0.321234	0.000841392	0.00658205	rs28737311
chr12:123266138-123266264	0.149597	0.000210385	0.00370367	rs4553407
chr12:20897000-20897126	-0.584068	4.56085e-05	0.00201398	rs2417886
chr12:26287702-26287828	-0.453007	0.000102735	0.00297444	rs12814794
chr12:52872846-52872972	-0.56738	8.58976e-05	0.00288272	rs11829175
chr14:103098970-103099096	-0.375449	0.000171714	0.00345764	rs62006947
chr15:78683450-78683576	-0.507409	1.7785e-05	0.00165796	rs72743199
chr15:78761712-78761838	0.303179	0.0016406	0.0092587	rs12898346
chr15:78767298-78767424	0.426903	0.000158814	0.00341284	rs1809424
chr15:89804044-89804170	-0.377337	0.000527444	0.00513235	rs41276914
chr16:53786091-53786217	2.62165	9.59736e-06	0.00134203	rs11075992
chr16:53786838-53786964	0.370563	0.00150521	0.00891336	rs9937709
chr16:58568098-58568224	-2.61918	4.89321e-06	0.0009474	rs112412326
chr17:18051351-18051477	1.31001	0.000686105	0.00590898	rs8080602
chr17:18063147-18063273	0.494515	0.000272775	0.00411123	rs1597700112
chr17:63685762-63685888	4.81608	2.17164e-05	0.0017428	rs3785574
chr17:63810138-63810264	0.666121	0.00010806	0.00297444	rs2584630
chr17:63882961-63883087	-1.38167	0.000343939	0.0045327	rs2727318
chr17:66194739-66194865	0.502781	7.27788e-05	0.00247546	rs9906486
chr17:67818203-67818329	-1.19078	0.000151822	0.00341284	rs3936134
chr17:67852815-67852941	0.411706	0.000667417	0.00587481	rs4791048
chr17:68052500-68052626	-0.4805	0.00174633	0.0096393	rs34503060
chr17:68065005-68065131	-0.697316	0.000210419	0.00370367	rs62084740
chr17:75320535-75320661	0.0953438	0.00138637	0.0086588	rs8079197
chr18:58473892-58474018	-0.408786	0.000991654	0.00721349	rs12455073
chr19:15870152-15870278	0.153151	0.000275137	0.00411138	rs7252638
chr19:17392545-17392671	-0.814493	0.000236792	0.00389217	rs8107160
chr19:17733765-17733891	0.733133	0.000128555	0.00311128	rs3787026
chr19:17747477-17747603	1.65764	0.00101633	0.00730287	rs28736584
chr19:19164441-19164567	1.21884	0.000193304	0.00365824	rs66907536
chr19:19172832-19172958	1.1737	9.67171e-07	0.000811457	rs60636572
chr19:19209953-19210079	1.63854	3.84668e-06	0.0009474	rs150057262
chr19:19373136-19373262	0.170855	0.00133692	0.0084126	rs59148799
chr19:33415154-33415280	-1.29483	0.000202999	0.00370367	rs4805885
chr19:41319223-41319349	-0.572758	0.000524041	0.00513235	rs73045269
chr19:48706019-48706145	-1.30473	0.000113553	0.00297722	rs2548459
chr19:48737695-48737821	-0.676976	9.06361e-05	0.00294873	rs427248
chr2:113818678-113818804	-0.335503	4.33393e-06	0.0009474	rs6739861
chr2:164775495-164775621	0.278569	0.00133408	0.0084126	rs355871
chr2:226059455-226059581	-0.554708	0.00155034	0.00901201	rs1522810
chr2:27385185-27385311	-1.7446	1.17628e-05	0.00140986	rs1647284
chr2:27388539-27388665	3.2491	0.000119277	0.00303253	rs7594812
chr20:40601676-40601802	-0.133133	0.00133037	0.0084126	rs6102060
chr21:39093545-39093671	-0.377682	0.000378082	0.0045327	rs2836878
chr22:17956409-17956535	0.489994	9.87094e-05	0.00297444	rs2003617
chr22:17967780-17967906	-0.19852	0.00181349	0.00987997	rs11704636
chr22:17975807-17975933	-0.590308	2.71407e-05	0.00179555	rs5992139
chr22:17976829-17976955	-1.6416	3.92464e-07	0.000725123	rs9605461
chr22:17977030-17977156	-0.713847	0.000471211	0.00489461	rs9605462
chr22:17980779-17980905	-0.386368	0.000417396	0.00468348	rs8140977
chr22:24599633-24599759	0.453583	0.000672382	0.00587634	rs2003757
chr22:24669154-24669280	-0.627119	0.00057071	0.00539484	rs131467
chr22:38174842-38174968	-0.509782	0.00166197	0.00929595	rs133013
chr22:38176567-38176693	0.122974	0.000970922	0.0071242	rs133017
chr22:38177996-38178122	0.313043	0.000440119	0.00479558	rs133024
chr22:43951022-43951148	0.27219	0.000507819	0.00508503	rs5764043
chr22:50424731-50424857	1.18266	3.4044e-05	0.00201398	rs10854887
chr3:12252640-12252766	-2.05148	0.000467694	0.00489461	rs9826367
chr3:12643450-12643576	0.298768	0.000439097	0.00479558	rs9837418
chr3:12654871-12654997	0.33712	0.00130759	0.0083823	rs7637392
chr3:36978396-36978522	-0.304971	0.000823015	0.00655547	rs7615360
chr3:37034430-37034556	-0.203743	0.000500682	0.00506111	rs6784088
chr3:37167393-37167519	-0.49218	0.000563236	0.00536994	rs11706079
chr3:37183284-37183410	-0.917076	0.000238138	0.00389217	rs11711937
chr4:99360007-99360133	-0.97276	0.000566553	0.00538118	rs1229860
chr5:133097542-133097668	-0.865157	0.00023428	0.00389217	rs62375243
chr5:157309540-157309666	-0.300703	0.000803385	0.00647788	rs17051932
chr5:56500186-56500312	1.30474	1.34014e-05	0.00146658	rs72754139
chr6:139513669-139513795	-0.114666	0.00146926	0.0088472	rs654689
chr6:139514199-139514325	0.262042	0.000899409	0.00681871	rs2908522
chr6:139518244-139518370	-0.881906	0.000158925	0.00341284	rs608662
chr6:31395649-31395775	-0.252953	0.000747051	0.00624693	rs2523464
chr6:31793373-31793499	-1.04246	0.0010213	0.00730287	rs2607014
chr6:32400622-32400748	0.21397	0.00117863	0.00801552	rs3129956
chr6:32484062-32484188	-0.501751	0.000491453	0.0050284	rs71565333
chr6:32584337-32584463	-0.487667	4.50433e-05	0.00201398	rs9269962
chr6:32604032-32604158	-0.237819	0.00123626	0.00818858	rs9270894
chr6:32607056-32607182	-0.155458	0.00144879	0.00880178	rs7770010
chr6:32614838-32614964	0.347195	0.00052812	0.00513235	rs9271333
chr6:32637292-32637418	-0.217854	0.000488859	0.00502228	rs9272422
chr6:32640821-32640947	1.27286	0.000594791	0.00550501	rs9272659
chr6:34199861-34199987	-0.640138	0.00069811	0.00597667	rs373112324
chr6:34210013-34210139	-0.281609	4.16199e-05	0.00201398	rs185139895
chr6:34216534-34216660	-0.153009	0.000472542	0.00489461	rs141130394
chr6:42952168-42952294	0.39899	0.000153368	0.00341284	rs2104616
chr6:42956101-42956227	1.92213	4.30581e-05	0.00201398	rs12524845
chr6:42956240-42956366	-0.486653	0.00148659	0.00888559	rs112122607
chr6:42966699-42966825	-0.896286	0.000544846	0.00527453	rs2274514
chr7:28110126-28110252	0.181558	0.000208225	0.00370367	rs11767776
chr7:28118280-28118406	-0.306648	0.000949847	0.0070524	rs6945413
chr7:28122992-28123118	-0.18113	0.000555273	0.00531415	rs12531540
chr8:125467057-125467183	-0.530092	0.000280953	0.00411138	rs6982502
chr8:19958045-19958171	0.615709	0.000401404	0.00465805	rs289
chr8:71523206-71523332	-0.360852	0.000242427	0.00391147	rs71525127
chr8:94914599-94914725	-0.650974	0.000370516	0.0045327	rs13262110
chr8:94976193-94976319	-0.443716	0.000109902	0.00297444	rs6471502
chr9:133317628-133317754	1.55221	0.000519136	0.00513235	rs11244079
chr9:95484859-95484985	-1.77144	9.98963e-05	0.00297444	rs28474857
chr15:40084828-40084954	1.31915	0.000278653	0.00411138	rs7183977
chr6:32548889-32549015	-2.55127	0.000363574	0.0045327	rs62405640
chr4:87252477-87252603	1.0726	0.000199693	0.00370367	rs7656630
chr8:125465454-125465580	-1.30782	0.000604901	0.0055365	rs2954019
chr1:93304752-93304878	-0.320524	0.000840935	0.00658205	rs11164897
chr1:62449739-62449865	-1.53152	0.00128347	0.00834079	rs11207970
chr6:32637251-32637377	0.347826	0.000209652	0.00370367	rs9272418
chr19:44887013-44887139	3.62825	0.000805553	0.00647788	rs283815
chr10:77819430-77819556	-2.26118	5.92543e-05	0.00225856	rs2289308
chr6:32431497-32431623	-1.48921	5.1017e-05	0.00214016	rs3129856
chr10:113026117-113026243	0.444586	9.87876e-05	0.00297444	rs4128598
chr6:32481886-32482012	-5.00491	4.35795e-05	0.00201398	rs2187822
chr7:130739148-130739274	3.3662	0.000148028	0.00341284	rs6973807
chr19:19187156-19187282	0.621548	0.000972283	0.0071242	rs73537449
chr19:7907667-7907793	2.3186	0.000418611	0.00468348	rs8107967
chr10:113013786-113013912	0.503853	0.00124877	0.00820667	rs55899248
chr22:38174119-38174245	0.685485	2.78876e-05	0.00179555	rs133010
chr6:42973009-42973135	1.06142	2.02237e-05	0.00169677	rs9296406
chr6:32490674-32490800	-2.62942	5.76767e-06	0.000954973	rs190685297
chr3:37076187-37076313	1.33496	0.000604676	0.0055365	rs726769
chr6:34260409-34260535	0.514378	0.00141992	0.00874001	rs151214526
chr8:19992418-19992544	0.521956	4.10069e-06	0.0009474	rs73600084
chr10:113053225-113053351	-0.663655	0.000581952	0.00542509	rs12718338
chr17:18046786-18046912	1.2146	0.000445211	0.0048107	rs12939020
chr15:66569931-66570057	0.281275	0.00118714	0.00801552	rs58507315
chr19:19468174-19468300	-1.84139	2.21572e-05	0.0017428	rs10405625
chr22:43928733-43928859	-0.578871	0.00122832	0.00815746	rs139051
chr20:40551119-40551245	-1.07024	0.000138385	0.00329864	rs1883711
chr3:12635596-12635722	3.44962	0.000379976	0.0045327	rs7610956
chr17:75321500-75321626	-2.77638	0.000157257	0.00341284	rs12946365
chr6:80602660-80602786	-4.34914	5.91645e-06	0.000954973	rs76207624
chr12:122123545-122123671	-0.830807	0.00166074	0.00929595	rs11608788
chr5:133074244-133074370	0.621198	0.000412114	0.00468348	rs72801456
chr20:34482291-34482417	-0.774018	1.31377e-05	0.00146658	rs6058059
chr10:100111928-100112054	-0.863358	0.000168133	0.00341284	rs12783521
chr20:40602403-40602529	4.30253	0.000113101	0.00297722	rs6124255
chr22:38175987-38176113	-0.468432	0.000401588	0.00465805	rs75387
chr2:164696369-164696495	-2.96853	3.68542e-06	0.0009474	rs6752978
chr6:32327812-32327938	-0.352099	4.47171e-05	0.00201398	rs4392743
chr6:31750556-31750682	0.621265	0.000436916	0.00479558	rs3117573
chr20:62374223-62374349	-1.1316	4.03718e-05	0.00201398	rs2427301
chr1:28263745-28263871	-0.699449	0.000165974	0.00341284	rs502273
chr3:37224571-37224697	0.682559	0.00110205	0.00769521	rs11926827
chr6:32639810-32639936	-3.16924	0.000207665	0.00370367	rs9272600
chr12:26319566-26319692	-0.779096	0.000678116	0.00588558	rs7132434
chr12:121168193-121168319	0.626485	2.01981e-05	0.00169677	rs2857590
chr1:155156484-155156610	1.40606	9.13789e-05	0.00294873	rs4971078
chr11:119066376-119066502	-3.38906	2.44358e-05	0.00179537	rs622478
chr5:157299268-157299394	0.974197	7.23299e-05	0.00247546	rs62383011
chr19:19307994-19308120	-0.51329	0.000763275	0.00627831	rs73001020
chr21:29024094-29024220	-0.84003	0.000108987	0.00297444	rs3761337
chr2:226099183-226099309	-1.06057	0.000710146	0.00601831	rs13430421
chr12:121171947-121172073	-2.57388	0.000252841	0.00402021	rs1718137
chr2:226057833-226057959	1.68167	0.000525316	0.00513235	rs16866798
chr18:58487097-58487223	-0.426357	0.000267091	0.00407645	rs7238710
chr7:135257518-135257644	1.41338	4.93495e-05	0.0021053	rs67633646
chr1:2234416-2234542	0.488597	0.0015622	0.00903556	rs12061341
chr6:31384237-31384363	0.860197	0.000344886	0.0045327	rs28752475
chr11:119083421-119083547	-1.62975	0.000762816	0.00627831	rs7952700
chr4:99546402-99546528	2.02336	3.02465e-06	0.0009474	rs6532820
chr10:100285639-100285765	1.15434	0.000220319	0.00379824	rs61871345
chr2:113096009-113096135	-0.469515	0.00117076	0.00800758	rs58865280
chr8:125447685-125447811	-1.42635	3.87412e-05	0.00201398	rs4871598
chr20:34477415-34477541	3.2045	0.000834972	0.00658205	rs6058057
chr16:58625340-58625466	-1.63574	3.50588e-06	0.0009474	rs149165
chr11:116860426-116860552	-0.477198	0.00118784	0.00801552	rs4938315
chr9:95470409-95470535	2.60583	4.16053e-05	0.00201398	rs56149656
chr6:32413440-32413566	2.29811	0.000329616	0.0044366	rs3129966
chr2:226059430-226059556	-0.638386	0.000146432	0.00341284	rs62189028
chr18:58444298-58444424	-0.788086	0.000604551	0.0055365	rs7234602
chr10:112922731-112922857	0.445858	0.000351982	0.0045327	rs3862012
chr17:18049070-18049196	1.41089	4.78222e-05	0.00207532	rs8070731
chr4:87318638-87318764	-2.81033	0.000509109	0.00508503	rs13119654
chr7:6416397-6416523	-0.294083	0.000937586	0.00702353	rs13235365
chr16:58576290-58576416	-1.82366	0.000277953	0.00411138	rs9936144
chr6:32543144-32543270	0.713189	0.000234647	0.00389217	rs559903629
chr6:158799423-158799549	-3.23957	0.000111306	0.00297722	rs3102994
chr6:32592064-32592190	-0.892012	4.82254e-06	0.0009474	rs35743245
chr22:28705306-28705432	0.246398	0.000106489	0.00297444	rs6005840
chr8:71556778-71556904	-0.231515	0.00183741	0.00996715	rs10216619
chr7:73556838-73556964	2.21665	0.00143175	0.00877548	rs13233571
chr1:62705329-62705455	3.0477	0.000303153	0.00430138	rs6682423
chr1:16102414-16102540	-1.5532	0.000399271	0.00465805	rs4434833
chr3:37193816-37193942	-0.853169	0.000706057	0.00600387	rs6762716
chr2:27525694-27525820	0.446195	0.000527543	0.00513235	rs1260333
chr8:54509146-54509272	0.230368	0.000844115	0.00658205	rs56204645
chr20:34410315-34410441	2.69711	0.0005949	0.00550501	rs1978829484
chr22:17997342-17997468	1.48256	0.000328965	0.0044366	rs9604818
chr22:43975064-43975190	1.3278	0.000152667	0.00341284	rs79564131
chr2:164760516-164760642	3.076	0.000507277	0.00508503	rs355833
chr3:37057471-37057597	-2.26453	0.000337797	0.00451708	rs2087234432
chr15:66569660-66569786	0.185843	0.000212322	0.00371121	rs57117342
chr6:32621465-32621591	-1.53127	0.000870743	0.00670233	rs9271502
chr8:125488872-125488998	-0.495919	0.00134332	0.00843177	rs2980858
chr7:73467414-73467540	-0.203071	0.000716552	0.00603237	rs71556715
chr2:111978315-111978441	-2.46534	0.00016355	0.00341284	rs7605527
chr15:78761409-78761535	-0.652491	3.91391e-05	0.00201398	rs1809419
chr6:32545535-32545661	-2.41524	0.000761705	0.00627831	rs74950807
chr3:12424871-12424997	-2.00245	0.00019161	0.00365366	rs1175543
chr20:46967676-46967802	0.931264	0.000493679	0.00503073	rs6063046
chr10:113031668-113031794	-1.34931	0.000176715	0.00349148	rs12260037
chr17:67851146-67851272	0.918516	6.20787e-05	0.00225856	rs7212293
chr3:125207841-125207967	-0.919159	0.000801767	0.00647788	rs9872582
chr17:67930052-67930178	-2.22776	0.000279804	0.00411138	rs916195966
chr6:32390361-32390487	-0.908741	0.000181824	0.0035204	rs3129950
chr8:144507788-144507914	1.7208	0.000209073	0.00370367	rs55776530
chr19:19584356-19584482	-2.19039	0.000651369	0.00583552	rs73004951
chr19:4338241-4338367	-0.302889	0.00159388	0.00903556	rs4140985
chr10:99847895-99848021	-1.24914	2.42766e-05	0.00179537	rs72838136
chr4:99545415-99545541	2.41431	9.93229e-05	0.00297444	rs11946292
chr5:56508662-56508788	0.605701	0.000846328	0.00658205	rs40270
chr1:219537981-219538107	3.24056	2.68442e-05	0.00179555	rs2785984
chr10:100053982-100054108	-2.54707	6.73544e-05	0.0023546	rs7084921
chr8:20062081-20062207	-0.163334	0.00110368	0.00769521	rs4128744
chr6:32478170-32478296	-3.33512	0.000166624	0.00341284	rs17209873
chr16:53766779-53766905	-1.15015	5.25286e-05	0.00216271	rs9940128
chr2:111926731-111926857	-2.8433	0.00122504	0.00815719	rs4468823
chr19:17393649-17393775	-2.88771	0.000167098	0.00341284	rs8112017
chr6:32622661-32622787	-0.744783	1.61077e-05	0.00155935	rs9271573
chr3:37059595-37059721	-2.0009	5.41491e-05	0.00216338	rs7372657
chr6:32343023-32343149	3.31608	0.000801234	0.00647788	rs2849018
chr3:37123093-37123219	-2.11699	0.000405809	0.00466402	rs6787539
chr10:112143006-112143132	-0.42337	3.45522e-05	0.00201398	rs2803606
chr19:19553205-19553331	-0.308435	0.000990247	0.00721349	rs17216588
chr3:160359793-160359919	-2.61313	0.000580845	0.00542509	rs140746547
chr19:15870932-15871058	-0.558929	0.000876571	0.00670756	rs55954696
chr11:116927765-116927891	-1.62072	0.000361224	0.0045327	rs1446105
chr11:94137109-94137235	-0.394673	0.00154231	0.00898608	rs7117339
chr22:28569997-28570123	3.21017	1.05264e-05	0.00139447	rs34593692
chr12:122114751-122114877	1.74049	0.000118121	0.00303253	rs28385906
chr19:10230115-10230241	1.08223	0.000235827	0.00389217	rs2033493
chr17:2075606-2075732	2.77401	0.000525329	0.00513235	rs9303241
chr6:158780738-158780864	-0.522497	0.00163614	0.00925429	rs3123108
chr6:127128239-127128365	2.28259	0.000267229	0.00407645	rs2745352
chr3:37159564-37159690	0.665839	0.00120967	0.00809771	rs2175881
chr6:42961732-42961858	0.541468	0.0013059	0.0083823	rs9471978
chr3:37105804-37105930	1.05853	0.000151194	0.00341284	rs6550455
chr1:11832495-11832621	-1.61187	0.000241316	0.00391147	rs2236796
chr19:33403877-33404003	-1.36093	0.00068394	0.00590898	rs10422861
chr7:73591383-73591509	-0.697901	0.000394451	0.00463941	rs35866503
chr22:28734249-28734375	1.61759	0.000228521	0.0038864	rs1033667
chr3:160610717-160610843	0.53265	0.000433231	0.00479558	rs4679903
chr19:19184684-19184810	-0.714885	0.000627767	0.00566341	rs11668300
chr6:15464825-15464951	2.15097	0.000370392	0.0045327	rs2237137
chr5:31020351-31020477	1.63382	2.49655e-05	0.00179537	rs6888304
chr6:32641862-32641988	-0.606754	0.000319652	0.00442349	rs9272741
chr19:18111222-18111348	2.44377	0.000470491	0.00489461	rs2038585390
chr19:33482944-33483070	-2.24146	0.000270849	0.00410679	rs10420551
chr1:219464233-219464359	-2.63453	6.0488e-05	0.00225856	rs1572385114
chr3:37052051-37052177	1.02107	0.000618527	0.00560011	rs4678930
chr7:73573676-73573802	-0.74833	0.000447349	0.00481168	rs35659126
chr1:11802658-11802784	1.54269	0.000487856	0.00502228	rs17367504
chr21:39094310-39094436	1.5752	0.000847841	0.00658205	rs2836881
chr19:17743651-17743777	1.47406	0.000355928	0.0045327	rs9630902
chr8:19994944-19995070	2.53649	0.000774364	0.00632816	rs17489282
chr6:32605722-32605848	0.510013	8.66982e-06	0.00128364	rs602457
chr6:31392832-31392958	-0.839524	0.000178944	0.00349148	rs3094591
chr3:37074488-37074614	2.09689	0.000962278	0.00712369	rs7651033
chr6:32615259-32615385	-1.43389	0.000425281	0.00473643	rs6605556
chr19:19325357-19325483	-0.58719	0.001473	0.00884853	rs111234557
chr8:20072204-20072330	2.7875	0.00108814	0.00762913	rs13439782
chr9:95504510-95504636	0.817319	0.000720748	0.00604707	rs28446321
chr16:79711712-79711838	0.405105	0.000404055	0.00466402	rs1916161596
chr2:226155874-226156000	0.794547	3.30712e-06	0.0009474	rs7578326
chr22:43975463-43975589	0.591339	0.00131297	0.00838768	rs61473277
chr11:61776426-61776552	1.06225	0.00104418	0.007406	rs174529
chr6:31978997-31979123	0.581859	0.00153935	0.00898608	rs386480
chr8:20075515-20075641	-0.583926	0.000687855	0.00590898	rs79445051
chr7:28117982-28118108	-1.28164	0.00118317	0.00801552	rs2391591
chr11:116833399-116833525	0.386175	5.94102e-05	0.00225856	rs7123454
chr21:39096849-39096975	-1.30162	0.000379341	0.0045327	rs4817988
chr19:19365648-19365774	-0.542733	0.00165698	0.00929595	rs4808196
chr6:32626017-32626143	0.805909	0.00124379	0.00820282	rs9271751
chr1:28258639-28258765	1.49873	0.00118555	0.00801552	rs580800
chr6:31834261-31834387	1.16112	0.000217847	0.00378152	rs3130476
chr12:52901547-52901673	1.40012	0.000105051	0.00297444	rs1799872
chr21:32426485-32426611	0.944665	0.000464131	0.00488794	rs7275247
chr8:20023484-20023610	1.60737	0.000226965	0.0038862	rs78404258
chr16:53787887-53788013	0.705737	0.00119378	0.00803406	rs7201850
chr21:29026915-29027041	-0.979534	0.00173268	0.00960606	rs1034123
chr20:34375057-34375183	0.487501	0.00158032	0.00903556	rs2378135
chr10:69334685-69334811	1.11694	0.000831115	0.00658205	rs17476364
chr2:201337777-201337903	0.467915	0.00075355	0.00627831	rs6745435
chr8:71577171-71577297	1.71468	0.000812738	0.00651484	rs2383837
chr2:111976057-111976183	-2.01726	0.000104274	0.00297444	rs66477683
chr15:78767290-78767416	-0.453021	0.00111791	0.00775142	rs116901435
chr8:115545665-115545791	2.25328	2.85348e-05	0.00179555	rs12056626
chr22:23924476-23924602	-0.733005	0.000102291	0.00297444	rs5751775
chr8:20009920-20010046	-0.756411	0.000572277	0.00539484	rs34327087
chr5:56574505-56574631	-0.298264	0.00157245	0.00903556	rs71624138
chr6:160349448-160349574	2.39391	0.0011535	0.00791108	rs655185
chr2:164747706-164747832	-0.276139	6.09169e-05	0.00225856	rs7601375
chr6:32618597-32618723	1.10432	0.000678047	0.00588558	rs562462
chr22:44001201-44001327	0.748114	0.000303059	0.00430138	rs8141994
chr18:58464570-58464696	0.299716	0.00105355	0.00744349	rs4640266
chr5:31039072-31039198	-1.92149	0.000716598	0.00603237	rs113131318
chr22:24602677-24602803	0.613577	0.000450787	0.00481168	rs2073397
chr2:201352130-201352256	0.938777	0.00145763	0.00880285	rs6726823
chr8:20007935-20008061	-0.958763	3.69197e-06	0.0009474	rs35495249
chr22:36159361-36159487	1.61799	0.000440008	0.00479558	rs4821460
chr6:32645391-32645517	-1.18773	0.00139189	0.00867176	rs9273173
chr19:19472120-19472246	-0.620004	0.00127675	0.00832536	rs73002960
chr12:123406599-123406725	0.943528	0.000947382	0.0070524	rs73216931
chr10:77811287-77811413	0.964385	0.00138291	0.00865865	rs2289309
chr3:37081696-37081822	-0.782578	0.00178719	0.00980034	rs6550451
chr5:56545934-56546060	1.48401	0.000167307	0.00341284	rs16885714
chr1:50874863-50874989	0.453682	0.00036974	0.0045327	rs58235906
chr1:62453130-62453256	1.36458	0.000255556	0.00402021	rs630144
chr7:87464868-87464994	-0.301198	0.00159357	0.00903556	rs10452935
chr1:62547662-62547788	1.61989	5.32728e-05	0.00216271	rs11207984
chr7:116759014-116759140	-0.359569	0.000391919	0.00463127	rs10215153
chr8:20010716-20010842	-1.71475	0.00130212	0.0083823	rs1837842
chr3:36970545-36970671	-1.07463	0.000703349	0.00600112	rs11718237
chr22:43929688-43929814	-0.704536	1.1631e-05	0.00140986	rs12484809
chr2:111983457-111983583	-0.22412	0.00141004	0.00872009	rs10188640
chr2:226227371-226227497	0.585699	1.95684e-05	0.00169677	rs2972149
chr22:24608578-24608704	0.54547	0.000968517	0.0071242	rs4822516
chr10:77876340-77876466	1.05433	0.00104455	0.007406	rs11002319
chr6:21939629-21939755	-1.10145	0.000371113	0.0045327	rs72657622
chr2:164706320-164706446	-0.835388	0.00154034	0.00898608	rs13017482
chr10:77830083-77830209	0.742173	0.000973669	0.0071242	rs55854323
chr6:130051776-130051902	0.527025	0.000553285	0.00531415	rs6914670
chr9:114372602-114372728	-0.608271	0.000880226	0.00671372	rs7032795
chr8:19996926-19997052	0.666277	0.000412024	0.00468348	rs4425772
chr15:78731361-78731487	0.467709	0.000311298	0.00435298	rs11639166
chr17:68003469-68003595	-0.604446	0.000906141	0.00682862	rs6504568
chr3:12605467-12605593	1.40978	0.0014584	0.00880285	rs6442319
chr1:88766017-88766143	0.497454	0.00111354	0.0077425	rs12021820
chr2:164774250-164774376	-1.18822	0.000116056	0.00301148	rs355866
chr2:232645018-232645144	1.5515	0.000184709	0.00354896	rs7604500
chr3:37216239-37216365	-0.265256	0.000356907	0.0045327	rs11129752
chr5:133106508-133106634	0.750332	0.00030419	0.00430138	rs56083805
chr1:23145492-23145618	-0.485223	0.00122067	0.0081497	rs1200993
chr8:20071008-20071134	-0.843317	0.000462354	0.00488794	rs9644568
chr12:122056840-122056966	0.952068	0.000159183	0.00341284	rs11835818
chr7:28144020-28144146	1.8125	0.000126708	0.00311128	rs849140
chr22:43929622-43929748	0.245678	0.000451155	0.00481168	rs12484801
chr17:63795884-63796010	1.79322	1.43032e-05	0.00150005	rs2665840
chr3:37051510-37051636	-1.47418	0.000773843	0.00632816	rs1558529
chr6:35225933-35226059	1.00993	0.000445329	0.0048107	rs763155
chr11:116903422-116903548	-2.13227	8.92384e-05	0.00294873	rs17120139
chr10:112227727-112227853	-0.300618	0.000378682	0.0045327	rs4573621
chr19:15868447-15868573	-1.22796	0.0015097	0.00891336	rs76183871
chr10:77921686-77921812	-0.255518	0.000577809	0.00542509	rs12220311
chr2:168947101-168947227	2.2066	0.00140056	0.0086828	rs853784
chr10:77814257-77814383	-1.15739	0.00142021	0.00874001	rs11002301
chr1:219454725-219454851	-0.256958	0.000460855	0.00488794	rs12024459
chr1:88722798-88722924	0.948053	9.34649e-05	0.00297444	rs7533835
chr6:32604121-32604247	-2.13053	0.000290595	0.00422791	rs17425622
chr6:32606902-32607028	-2.22225	0.000161098	0.00341284	rs515185
chr10:100278865-100278991	0.63645	0.000105465	0.00297444	rs12254005
chr11:94190332-94190458	0.316634	0.00132197	0.0084126	rs10765656
chr20:33712802-33712928	-0.385999	0.000321235	0.00442349	rs34587839
chr5:131984706-131984832	-0.895658	0.00149851	0.00889566	rs253942
chr22:17967047-17967173	0.454853	0.000849888	0.00658205	rs5992926
chr10:99855195-99855321	0.362194	0.0013088	0.0083823	rs11816708
chr12:122141382-122141508	0.333739	0.00166074	0.00929595	rs7953704
chr2:101045371-101045497	-0.940107	0.00179533	0.00980463	rs67648215
chr6:32641814-32641940	0.783824	0.000378153	0.0045327	rs9272734
chr11:47406125-47406251	-0.581189	0.00157648	0.00903556	rs11039221
chr19:15867713-15867839	-1.71587	0.000237998	0.00389217	rs12611308
chr12:26303192-26303318	-0.235594	0.00100916	0.00729903	rs10842703
chr6:160351747-160351873	-1.18139	0.000782213	0.00637162	rs539958
chr6:15476325-15476451	0.214265	0.00032337	0.00442349	rs2064097
chr1:219453746-219453872	1.54598	0.00105575	0.00744349	rs11118305
chr5:133061215-133061341	0.799181	0.000551825	0.00531415	rs4705989
chr1:62608708-62608834	0.653526	0.000934053	0.00701794	rs6678483
chr1:11067325-11067451	-0.489885	0.00126264	0.00825468	rs11576271
chr17:67831264-67831390	-1.63819	0.000498886	0.00506111	rs62084208
chr17:68024439-68024565	-0.904651	0.00178357	0.00980034	rs189628481
chr7:36045469-36045595	0.668229	0.000369175	0.0045327	rs2700938
chr19:35528557-35528683	-0.923359	0.000350085	0.0045327	rs4805129
chr16:79678801-79678927	-1.72311	1.54485e-05	0.00155535	rs28773265
chr3:37089388-37089514	0.237278	4.55361e-05	0.00201398	rs3821824
chr3:155848692-155848818	-1.00554	0.00151212	0.00891336	rs62286778
chr5:133097863-133097989	-1.45682	0.000310166	0.00435298	rs4705880
chr2:164653006-164653132	-0.48885	0.00114844	0.00789789	rs7607886
chr8:20011365-20011491	-0.533452	0.000902836	0.00682414	rs1441754
chr5:157295355-157295481	-0.714104	0.00133307	0.0084126	rs17054431
chr6:32591167-32591293	-0.998605	0.00020489	0.00370367	rs9270475
chr10:34764057-34764183	1.38019	0.000757261	0.00627831	rs10827420
chr8:115583898-115584024	1.5458	0.00183377	0.00996715	rs6469603
chr6:80712958-80713084	-0.487847	0.00178067	0.00980034	rs75940653
chr10:96717601-96717727	-0.584177	0.000265886	0.00407645	rs61856817
chr6:31387685-31387811	-1.0015	0.000659003	0.00586117	rs2596558
chr3:37032025-37032151	0.74863	0.00143643	0.00877548	rs6765395
chr5:133107955-133108081	-1.25073	0.00102687	0.00732189	rs62375250
chr1:16199408-16199534	1.04574	0.00148976	0.00888559	rs221034
chr10:17834641-17834767	1.23139	0.000892928	0.00679003	rs545193344
chr10:99849842-99849968	-0.659175	0.00101911	0.00730287	rs72838150
chr12:121170407-121170533	-1.40021	0.00149626	0.00889566	rs2567988
chr1:219495821-219495947	1.38375	0.00158977	0.00903556	rs765751
chr7:73596049-73596175	1.47316	0.00145123	0.00880178	rs13247874
chr14:77046767-77046893	0.682112	9.52882e-05	0.00297444	rs55715661
chr20:14701154-14701280	-1.17945	0.000657081	0.00586117	rs1932951
chr4:145893102-145893228	-0.498418	0.000364369	0.0045327	rs7678352
chr22:23910347-23910473	-0.663437	0.000388086	0.00460761	rs5760107
chr15:78668124-78668250	-0.31083	6.07055e-06	0.000954973	rs6495314
chr10:34737150-34737276	-0.350136	0.000876753	0.00670756	rs10450314
chr6:32614693-32614819	-0.422723	0.00170727	0.00948608	rs9271327
chr3:12350251-12350377	0.616731	0.000138918	0.00329864	rs7647481
chr3:12227041-12227167	-0.548166	0.000667539	0.00587481	rs7641325
chr10:69217489-69217615	1.00354	0.000264615	0.00407645	rs10998647
chr22:44000590-44000716	-0.805744	0.00169664	0.00944787	rs75848795
chr22:28248830-28248956	1.22445	0.00179576	0.00980463	rs134188
chr6:34271633-34271759	-0.76202	0.00143479	0.00877548	rs1187130
chr6:31384447-31384573	0.820947	0.000358112	0.0045327	rs28366089
chr11:94142258-94142384	0.764282	0.000863197	0.00666462	rs7948455
chr19:15877094-15877220	-0.545821	0.00099447	0.00721349	rs3093211
chr19:33365447-33365573	-0.399629	0.000339185	0.00451708	rs1559191
chr5:56563256-56563382	-1.02326	0.000418667	0.00468348	rs71624137
chr7:73633455-73633581	-0.770214	0.000665235	0.00587481	rs35703204
chr13:110366319-110366445	0.380561	0.000833211	0.00658205	rs7333748
chr8:8775975-8776101	0.905165	0.00139673	0.00868041	rs609958
chr22:43952503-43952629	0.479547	0.00108694	0.00762913	rs34912062
chr7:130753709-130753835	0.572293	0.0017371	0.00960938	rs201632637
chr5:157333947-157334073	0.752648	0.00144287	0.00879345	rs1900156
chr17:18016372-18016498	-0.273176	0.00152377	0.00894744	rs9913277
chr10:112190597-112190723	0.409143	0.0012948	0.00837794	rs7096937
chr4:99367727-99367853	-0.687114	0.00125431	0.00822159	rs1154446
chr17:63890579-63890705	0.54781	0.00128575	0.00834079	rs2854183
chr10:100184411-100184537	0.679529	0.00159177	0.00903556	rs11190416
chr2:111986873-111986999	0.339145	0.00113548	0.00784468	rs1996326
chr10:77835110-77835236	-0.465544	0.00158136	0.00903556	rs11002309
chr11:57850533-57850659	-0.799912	0.00152501	0.00894744	rs7932091
chr6:32611868-32611994	0.716409	0.00017881	0.00349148	rs13207945
chr2:226230441-226230567	-0.752174	0.000254311	0.00402021	rs2222018
chr3:113284163-113284289	-0.554469	0.000128476	0.00311128	rs9864630
chr7:73637539-73637665	-0.26551	0.000259432	0.00405584	rs799166
chr19:19324808-19324934	-0.845462	0.00158781	0.00903556	rs4808194
chr6:32463284-32463410	-0.514508	0.000418238	0.00468348	rs7747529
chr1:16121737-16121863	-0.680828	0.000174845	0.00349148	rs10796410
chr17:67838558-67838684	0.421888	0.00082117	0.00655547	rs2052187
chr12:123347014-123347140	-0.532194	0.00101282	0.00730287	rs200910396
chr4:99358112-99358238	-0.446974	0.00156169	0.00903556	rs1614377
chr8:20028152-20028278	0.33945	0.000672266	0.00587634	rs11984636
chr8:54536658-54536784	-0.15766	0.00120482	0.00808673	rs28571765
chr11:61814229-61814355	-0.39179	0.000321882	0.00442349	rs174560
chr6:32637808-32637934	1.24569	0.000327248	0.0044366	rs9272464
chr2:201363816-201363942	0.586084	0.00169509	0.00944787	rs11687854
chr6:32684441-32684567	0.502489	0.00124493	0.00820282	rs2856694
